# Supplementary material for: Knee arthroscopy versus conservative management in patients with degenerative knee disease: a systematic review
Source: PubMed Central journal article supplement — BMJ Open. 2017 May 11;7(5):e016114. doi: 10.1136/bmjopen-2017-016114 (PMC5541494; doi:10.1136/bmjopen-2017-016114), 2017-05-11
Supplement: bmjopen-2017-016114.draft_revisions.pdf [file bmjopen-2017-016114.draft_revisions.pdf]

# BMJ Open

## Knee arthroscopy versus conservative management in patients with degenerative knee disease: a systematic review

|                                 |                                                                                                                                                                                                                                                                                                                                                                                                                                                                                                                                                                                                                                                                                                                                                                                                                                                                                                                       |
|---------------------------------|-----------------------------------------------------------------------------------------------------------------------------------------------------------------------------------------------------------------------------------------------------------------------------------------------------------------------------------------------------------------------------------------------------------------------------------------------------------------------------------------------------------------------------------------------------------------------------------------------------------------------------------------------------------------------------------------------------------------------------------------------------------------------------------------------------------------------------------------------------------------------------------------------------------------------|
| Journal:                        | <i>BMJ Open</i>                                                                                                                                                                                                                                                                                                                                                                                                                                                                                                                                                                                                                                                                                                                                                                                                                                                                                                       |
| Manuscript ID                   | bmjopen-2017-016114                                                                                                                                                                                                                                                                                                                                                                                                                                                                                                                                                                                                                                                                                                                                                                                                                                                                                                   |
| Article Type:                   | Research                                                                                                                                                                                                                                                                                                                                                                                                                                                                                                                                                                                                                                                                                                                                                                                                                                                                                                              |
| Date Submitted by the Author:   | 25-Jan-2017                                                                                                                                                                                                                                                                                                                                                                                                                                                                                                                                                                                                                                                                                                                                                                                                                                                                                                           |
| Complete List of Authors:       | Brignardello-Petersen, Romina; University of Toronto, Clinical Epidemiology and Health Care Research<br>Siemieniuk, Reed; McMaster University, Clinical Epidemiology & Biostatistics; University of Toronto, Medicine<br>Guyatt, Gordon; McMaster University,<br>Buchbinder, Rachele; Cabrini Hospital, Monash Department of Clinical Epidemiology<br>Poolman, Rudolf; Onze Lieve Vrouwe Gasthuis, Orthopaedic Surgery<br>Schandelmaier, Stefan; McMaster University Department of Clinical Epidemiology and Biostatistics<br>Chang, Yaping; McMaster University, Department of Clinical Epidemiology and Biostatistics<br>Sadeghirad, Behnam ; Kerman University of Medical Sciences, Research Center for Modeling in Health, Institute for Futures Studies in Health<br>Evaniew, Nathan; McMaster University, Orthopaedic Surgery<br>Vandvik, Per; Innlandet Hospital Trust-divisjon Gjøvik, Department of Medicine |
| <b>Primary Subject Heading</b>: | Rheumatology                                                                                                                                                                                                                                                                                                                                                                                                                                                                                                                                                                                                                                                                                                                                                                                                                                                                                                          |
| Secondary Subject Heading:      | Evidence based practice, General practice / Family practice, Surgery, Sports and exercise medicine                                                                                                                                                                                                                                                                                                                                                                                                                                                                                                                                                                                                                                                                                                                                                                                                                    |
| Keywords:                       | Knee < ORTHOPAEDIC & TRAUMA SURGERY, arthritis, Osteoarthritis, knee pain, meniscus tear, GRADE                                                                                                                                                                                                                                                                                                                                                                                                                                                                                                                                                                                                                                                                                                                                                                                                                       |
|                                 |                                                                                                                                                                                                                                                                                                                                                                                                                                                                                                                                                                                                                                                                                                                                                                                                                                                                                                                       |

SCHOLARONE™  
Manuscripts

1  
2  
3  
4  
5  
6  
7  
8  
9  
10  
11  
12  
13  
14  
15  
16  
17  
18  
19  
20  
21  
22  
23  
24  
25  
26  
27  
28  
29  
30  
31  
32  
33  
34  
35  
36  
37  
38  
39  
40  
41  
42  
43  
44  
45  
46  
47  
48  
49  
50  
51  
52  
53  
54  
55  
56  
57  
58  
59  
60

## KNEE ARTHROSCOPY VERSUS CONSERVATIVE MANAGEMENT IN PATIENTS WITH DEGENERATIVE KNEE DISEASE: A SYSTEMATIC REVIEW

Romina Brignardello-Petersen, *Postdoctoral Fellow*,<sup>1,2</sup> Gordon H. Guyatt, *Distinguished Professor*,<sup>1</sup>  
Rachelle Buchbinder, *Professor and rheumatologist*,<sup>3,4</sup> Rudolf W. Poolman, *Consultant Orthopaedic  
Surgeon*,<sup>5</sup> Stefan Schandelmaier, *PhD Student*,<sup>1,5=6</sup> Yaping Chang, *PhD Student*,<sup>1</sup> Behnam Sadeghirad,  
*PhD Student*,<sup>1,7</sup> Nathan Evaniew, *Resident*,<sup>8</sup> Per O. Vandvik, *Associate Professor*.<sup>9,10</sup>

<sup>1</sup> Department of Health Research Methods, Evidence, and Impact, McMaster University, 1280 Main St  
West, Hamilton, Ontario, L8S 4L8, Canada

<sup>2</sup> Evidence-Based Dentistry Unit, Faculty of Dentistry, Universidad de Chile, Sergio Livingstone 943,  
Independencia, Santiago, Chile

<sup>3</sup> Department of Epidemiology and Preventive Medicine, School of Public Health & Preventive  
Medicine, Monash University, Melbourne, Vic 3004, Australia

<sup>4</sup> Monash Department of Clinical Epidemiology, Cabrini Institute, Suite 41 Cabrini Medical Centre, 183  
Wattletree Road, Malvern, Vic 3144, Australia

<sup>5</sup> Department of Orthopedic Surgery and Traumatology, Joint Research, OLVG, Postbus 95500, 1090  
HM, Amsterdam, The Netherlands

<sup>6</sup> Institute for Clinical Epidemiology and Biostatistics, University Hospital Basel, Spitalstrasse 12, 1<sup>st</sup>  
floor, CH-4031, Basel, Switzerland

<sup>7</sup> HIV/STI Surveillance Research Center, and WHO Collaborating Center for HIV Surveillance, Institute  
for Futures Studies in Health, Kerman University of Medical Sciences, Medical University Campus, Haft-  
Bagh Highway, 7616913555, Kerman, Iran

<sup>8</sup> Division of Orthopaedics, Department of Surgery, McMaster University, 1280 Main St West, Hamilton,  
Ontario, L8S 4L8, Canada

<sup>9</sup> Department of Medicine, Innlandet Hospital Trust- Division Gjøvik, Kyrre Grepps gate 11, 2819  
Gjøvik, Norway

<sup>10</sup> Institute of Health and Society, Faculty of Medicine, University of Oslo, P.O Box 1130, Blindern 0318,  
Oslo, Norway

### Correspondence to:

Romina Brignardello-Petersen (brignarr@mcmaster.ca)  
Department of Health Research Methods, Evidence, and Impact  
1280 Main Street West, Hamilton, Ontario, L8S 4K1, Canada

## ARTICLE SUMMARY

### ABSTRACT

**Objective:** To determine the effects and complications of arthroscopic surgery compared to conservative management strategies in patients with degenerative knee disease

**Design:** Systematic review

**Main Outcome Measures:** Pain, function, adverse events

**Data sources:** MEDLINE, EMBASE, the Cochrane Central Register of Controlled Trials (CENTRAL), Google Scholar and Open Grey up to August 2016.

**Eligibility criteria:** For effects, randomized clinical trials (RCTs) comparing arthroscopic surgery with a conservative management strategy (including sham surgery) in patients with degenerative knee disease.

For complications, RCTs and observational studies.

**Review methods:** Two reviewers independently extracted data and assessed risk of bias for patient-important outcomes. A parallel guideline committee (*BMJ* Rapid Recommendations) provided input on the design and interpretation of the systematic review, including selection of patient-important outcomes. We used the GRADE approach to rate the certainty (quality) of the evidence.

**Results:** We included 13 RCTs and 12 observational studies. With respect to pain, the review identified high certainty evidence that knee arthroscopy results in a very small reduction in pain up to 3 months (mean difference= 5.4 on a 100-point scale, 95% CI 2.0; 8.8) and very small or no pain reduction up to 2 years (mean difference= 3.1, 95% CI -0.2; 6.4) when compared to conservative management. With respect to function, the review identified moderate certainty evidence that knee arthroscopy results in a very small improvement in the short-term (mean difference= 4.9 on a 100-point scale, 95% CI 1.5; 8.4) and very small or no improved function up to 2 years (3.2, 95% CI -0.5; 6.8). Alternative presentations of magnitude of effect, and associated sensitivity analyses, were consistent with the findings of the primary analysis. Low quality evidence suggested a very low probability of serious complications after knee arthroscopy.

**Conclusion:** Over the long term, patients who undergo knee arthroscopy versus those who receive conservative management strategies do not have important benefits in pain or function.

**Systematic review registration:** PROSPERO CRD42016046242

**STRENGTHS AND LIMITATIONS OF THIS STUDY**

- This is an update of previously published systematic reviews on the topic.
- This review is linked to a BMJ Rapid Recommendations project. We conducted the review directed by a guideline panel that included patient representatives. This guideline panel provided detailed input with regards to the patients, interventions and outcomes, and the interpretation of the results from this review.
- We included 7 new studies, analyzed data focusing on clinical interpretability, and explicitly assessed the certainty in the estimates of effect.
- We performed meta-analyses using different measures of effect, and conducted subgroup and sensitivity analyses that strengthened our conclusions.

### WHAT IS ALREADY KNOWN IN THIS TOPIC:

- Although systematic reviews have failed to establish that knee arthroscopy has clear benefits over conservative management strategies, orthopaedic surgeons often offer this procedure to patients with degenerative knee disease
- Current guideline recommendations on managements of knee pain and associated functional limitation provide conflicting guidance and exclude many patients with degenerative knee disease (eg. those with meniscal tears with or without radiographic evidence of osteoarthritis)

### WHAT THIS STUDY ADDS

- Moderate to high certainty evidence shows that there are at best only very small differences in pain, function, and quality of life of patients who underwent knee arthroscopy compared to those who received conservative management strategies over the short term, and no benefit over the long term.
- Patients can expect, on average, to achieve small but important improvement over the period of two years, irrespective of what treatment they receive.
- Patients and their health care providers must trade off the marginal short-term benefits against the burden and potential complications of the surgical procedure

### INTRODUCTION

As a result of degenerative knee disease (osteoarthritis in the knee which can involve the joint lining and/or menisci), approximately 25% of people over 45 years experience pain and other symptoms that may be severe and negatively impact quality of life.<sup>1 2 3</sup> Total knee arthroplasty is the only definitive therapy available, but is reserved for patients with severe disease who fail conservative management.

In the United States, arthroscopic knee surgery in people with degenerative knee disease is the most common ambulatory orthopaedic procedure, and the ninth most commonly performed ambulatory procedure overall.<sup>4</sup> Such surgery results in transient increase in pain and the necessity for restriction in activities for a period of 2 to 6 weeks. Current guidelines recommend against arthroscopic lavage and/or debridement for patients with symptomatic knee osteoarthritis, but do not make specific recommendations for or against partial meniscectomy in those with degenerative meniscal tears (with or without other concomitant degenerative changes).<sup>5 6</sup> Further, many orthopedic surgeons suggest that patients with mechanical symptoms and meniscal tears – typically locking or catching of the knee – may benefit from arthroscopic partial meniscectomy.<sup>7 8</sup>

1  
2  
3 Our systematic review informs the second *BMJ* Rapid Recommendations,<sup>9</sup> a new *BMJ* series of  
4 trustworthy clinical practice recommendations published in response to potentially practice-changing  
5 evidence.<sup>10</sup> A trial that compared the outcomes of exercise therapy versus knee arthroscopic partial  
6 meniscectomy in 140 middle-aged patients with degenerative meniscal tears, published in July 2016  
7 triggered this systematic review.<sup>11</sup> Previous systematic reviews addressing the impact of arthroscopic  
8 knee surgery did not consider all patient-important outcomes; did not consider patient importance when  
9 addressing patient-reported outcomes such as pain, function, and quality of life (QoL); and did not  
10 include all currently available randomized controlled trials (RCTs).<sup>12 13</sup>  
11  
12

13  
14  
15  
16  
17  
18 To determine the effects and complications in patients with symptomatic degenerative knee disease, we  
19 performed a systematic review and meta-analysis of arthroscopic surgery with debridement, and/or partial  
20 meniscectomy compared to conservative management strategies.  
21  
22

## 23 24 25 26 **METHODS**

27  
28 Readers can access the protocol of this systematic review in PROSPERO (CRD42016046242). According  
29 to the *BMJ* Rapid Recommendations process,<sup>10</sup> a guideline panel provided critical oversight to the review  
30 and identified populations, subgroups, and outcomes of interest. The panel included eight content experts  
31 and front line clinicians (three orthopaedic surgeons, one rheumatologist, one epidemiologist, one general  
32 practitioner and two physiotherapists), four methodologists (three of them whom are also front line  
33 clinicians and general internists) and three patients with lived experience of degenerative knee disease.  
34  
35  
36  
37

38  
39 All patients received personal training and support to optimize contributions throughout the guideline  
40 development process. The patient panel members led the interpretation of the results based on what they  
41 expected the typical patient values and preferences to be, as well as the variation between patients. We  
42 also considered patients' values and preferences by using the minimally important difference (MID) to  
43 interpret the results obtained in the meta-analyses. These MIDs were obtained from a systematic review  
44 of studies in which patients were directly asked about the magnitude of change they had experienced, and  
45 whether that change was trivial, small but important, or larger.<sup>14</sup> Clinical experts who were part of the  
46 team of that systematic review judged the applicability of such studies to the target population and raised  
47 no concerns.  
48  
49  
50  
51  
52

## 53 54 55 **Eligibility criteria**

56  
57  
58  
59  
60

1  
2  
3 For the effects of arthroscopic surgery, we included RCTs comparing arthroscopic surgery, including any  
4 or all of debridement and/or partial meniscectomy to any conservative management strategy (exercise  
5 therapy, injections, drugs, sham surgery) in patients with symptomatic degenerative knee disease (defined  
6 as persistent knee pain that affects the patient's quality of life and does not respond to conservative  
7 treatment), with or without osteoarthritis, of any age. We excluded studies that enrolled patients with  
8 acute trauma and those that enrolled fewer than 10 patients. For the complications of arthroscopic  
9 surgery, we also included observational studies (cohort studies, registry studies, and case series) in  
10 patients with degenerative knee disease undergoing arthroscopic surgery, with or without a comparison  
11 group. We excluded studies published before the year 2000 when considering complications (but not  
12 effects).  
13  
14  
15  
16  
17  
18  
19  
20

### 21 **Literature search**

22 We performed an update of a previously published systematic review<sup>13</sup> including MEDLINE (Pubmed),  
23 EMBASE (Ovid) and CENTRAL (See Appendix 1) from January 1 2014, to August 16, 2016. In  
24 addition, we constructed specific search strategies for these three databases for one outcome not studied in  
25 the previous review (nerve damage), with no date limits. We also searched for grey literature using the  
26 first 500 hits from Google Scholar and Open Grey. We did not limit any of the searches by language of  
27 publication.  
28  
29  
30  
31  
32  
33

### 34 **Study selection and data abstraction**

35 Teams of two reviewers, working independently, performed all study selection and data abstraction using  
36 standardized forms, and reviewed the titles and abstract of all the references resulting from the searches.  
37 We retrieved and reviewed the full text of all references identified as potentially eligible by at least one  
38 reviewer. We also reviewed the full text of all references excluded at the full text screening stage in the  
39 prior review.<sup>15</sup> We included all studies judged as eligible by the two reviewers. Reviewers resolved  
40 disagreements by discussion.  
41  
42  
43  
44  
45  
46

47 Reviewers abstracted characteristics of eligible studies including study design, number of patients  
48 enrolled, age and sex distribution, number of patients followed-up, whether partial meniscectomy was  
49 performed, co-interventions, and outcomes, including pain, function, quality of life, and knee  
50 replacement. When authors reported results from more than one measure of pain or function, we decided  
51 a priori to use only the measure ranked highest in a hierarchy of patient-reported outcomes specific to the  
52 patients of interest.<sup>16</sup> When studies had more than two arms, we only used the data from the arms relevant  
53  
54  
55  
56  
57  
58  
59  
60

1  
2  
3 to this study. The review addressed these outcomes at 3 months or less, and at the longest follow-up  
4 reported.  
5  
6

7  
8 The review addressed complication outcomes of mortality, venous thromboembolism (VTE), infection,  
9 and nerve damage. Reviewers abstracted the absolute number of patients who experienced the outcomes  
10 over the follow-up period. When studies did not report VTE but reported pulmonary embolism and deep-  
11 vein thrombosis separately instead, we used these numbers to estimate the number of VTEs, considering  
12 the potential overlap due to patients experiencing both.<sup>17</sup> We examined these outcomes over the three  
13 months following surgery.  
14  
15  
16  
17

### 18 19 **Summary measures and data synthesis**

20 We summarized continuous outcomes (pain, function and quality of life) at the study level using the  
21 difference in change from baseline between groups. When baseline mean and standard deviation per  
22 group at baseline and follow-up, but not change measures, were available, we assumed a within group  
23 correlation of 0.5 to estimate the standard deviation of the change from baseline per study arm. If arm  
24 level data were not reported, we abstracted the difference in change from baseline between the groups.  
25 When standard deviations at follow up were not reported, we assumed the same standard deviation as at  
26 baseline. When no standard deviations were available, we used the weighted average from all the other  
27 RCTs measuring the outcome with the same instrument. When studies reported medians and interquartile  
28 ranges, we converted to means and standard deviations.<sup>18</sup>  
29  
30  
31  
32  
33  
34  
35  
36

37 We performed meta-analyses, and present results for patient reported continuous outcomes in two ways.  
38 First, we transformed all scores to the scale of an index instrument, the highest in the hierarchy, and  
39 pooled results of all studies using the mean difference as the summary measure. This resulted in scores  
40 that could range from 0 to 100, in which higher scores signified better outcomes (less pain, better  
41 function, better quality of life). Second, we used the minimally important difference (MID) of each of the  
42 instruments to determine the proportion of patients who reached a change in the outcome that was larger  
43 than a MID. To inform this analysis, a parallel team performed a linked systematic review to establish the  
44 most credible MIDs for each of the instruments used to measure pain, function, and QoL. The most  
45 credible MID was the median of all the credible MIDs. Details of this review are available in a  
46 publication related to this *BMJ* Rapid Recommendation.<sup>14</sup> We then estimated and pooled the difference in  
47 the proportion of patients between groups achieving this difference.<sup>15</sup> When no credible MID was found  
48 for a particular instrument, we used the MID of the index instrument. Data for time-to-knee replacement  
49 was not available, so we summarized the data for knee replacement using the proportion of patients who  
50  
51  
52  
53  
54  
55  
56  
57  
58  
59  
60



1  
2  
3 had the outcome per group and pooled those data using relative risk as the summary measure. These  
4 meta-analyses were performed using random effects models using the Hartung-Knapp-Sidik-Jonkman  
5 method.<sup>19 20</sup> All analyses were performed using an intention-to-treat approach. When authors did not  
6 report data in a way that allowed incorporation it in the meta-analyses, we summarized the results  
7 narratively.  
8  
9

10  
11  
12 For complications, we used the number of patients having the event and the total number of patients  
13 undergoing knee arthroscopy, and pooled these data using a generalized linear mixed effects model that  
14 allowed inclusion of studies with no events without a continuity correction.<sup>21</sup>  
15  
16  
17

18  
19 We planned to perform four subgroup analyses for the outcomes pain and function: trials in which there  
20 was more than 50% of patients with radiographic osteoarthritis (defined as Kellgren-Lawrence grades 2 to  
21 4) versus trials with equal or less than 50% of patients with radiographic osteoarthritis; trials in which  
22 patients were blinded versus not blinded; trials in which meniscectomy was performed versus those in  
23 which it was not; and trials in which a control group received an active intervention (e.g. exercise therapy,  
24 injections) versus control groups without such interventions (e.g. waiting list, no treatment). We  
25 performed sensitivity analyses for calculating the difference in patients who achieve a change higher than  
26 the MID in two ways: 1) using the lowest and highest value of the MID of each instrument, based on the  
27 range of the MIDs that were deemed credible, and 2) calculating the standardized mean difference and  
28 then transforming the standardized mean difference into a risk difference<sup>15</sup> (this method does not use an  
29 MID). All data analyses used the package *meta* in the software R, version 3.3.1.<sup>22</sup>  
30  
31  
32  
33  
34  
35  
36  
37  
38

### 39 **Certainty of the evidence assessments**

40 We assessed the certainty of the estimates of effect (quality of evidence) using the GRADE approach.<sup>23</sup>  
41 We considered potential limitations in risk of bias, inconsistency, imprecision, indirectness, and  
42 publication bias.<sup>24-27</sup> We used a modification of the Cochrane Risk of Bias tool<sup>28</sup> to assess the risk of bias  
43 of the studies informing on the effects of arthroscopic surgery, and the relevant items of the  
44 Methodological Index for Non-Randomized Studies (MINORS) tool<sup>29</sup> to assess the risk of bias of the  
45 studies informing on the complications of knee arthroscopy. All authors, in consultation with the parallel  
46 *BMJ* Rapid Recommendation guideline panel<sup>30</sup> participated in, and came to consensus regarding,  
47 certainty of estimates ratings.  
48  
49  
50  
51  
52  
53

54  
55 The median of the change in score in the control arm from the studies that reported this information and  
56 did not use sham surgery as a control provided estimates of expected outcome in the control group (which  
57  
58  
59  
60

1  
2  
3 is the equivalent of the baseline risk in dichotomous outcomes), which informed calculation of absolute  
4 estimates of effect. Summary of findings tables<sup>31</sup> created using MAGICapp<sup>32</sup> summarized key  
5 information for all patient-important outcomes.  
6  
7  
8  
9  
10

## 11 RESULTS

12 Of 710 unique references screened in title and abstract, 149 articles underwent full text screening, of  
13 which 13 RCTs informing the effects of knee arthroscopy<sup>11 33-45</sup> and 15 studies informing the  
14 complications of knee arthroscopy (12 OS<sup>46-57</sup> and 3 RCTs<sup>11 37 42</sup>) proved eligible (Figure 1).  
15  
16  
17  
18

### 19 Effects

#### 20 *Study Characteristics*

21 The 13 eligible RCTs were published between 1993 and 2016, recruited a median of 119 patients, and  
22 enrolled patients with mean age from 48.9<sup>43</sup> to 62.8<sup>33</sup> years old, and a sex distribution from 5%<sup>39</sup> to  
23 81.7%<sup>41</sup> women. Two studies performed sham surgery in the control group,<sup>39 42</sup> while most of the other  
24 studies used exercise therapy.<sup>11 34 35 37 38 40 43 45</sup> Table 1 presents details of study characteristics.  
25  
26  
27  
28  
29  
30  
31  
32  
33  
34  
35  
36  
37  
38  
39  
40  
41  
42  
43  
44  
45  
46  
47  
48  
49  
50  
51  
52  
53  
54  
55  
56  
57  
58  
59  
60

Table 1: Characteristics of randomised clinical trials included in systematic review of effects

| Study                                             | Number of patients enrolled | Comparator                | Patients age (mean) | % females | ROA > 50% <sup>1</sup> | Pain measure <sup>2</sup>       | Baseline mean intervention (SD) | Baseline mean control (SD) | Function measure <sup>2</sup>   | Baseline mean (SD) | Baseline mean control (SD) |
|---------------------------------------------------|-----------------------------|---------------------------|---------------------|-----------|------------------------|---------------------------------|---------------------------------|----------------------------|---------------------------------|--------------------|----------------------------|
| Chang, 1993 <sup>33</sup>                         | 34                          | Close needle joint lavage | 62.8                | 71.6      | Y                      | AIMS pain                       | 65 (20)                         | 61 (21)                    | AIMS physical function          | 23 (16)            | 17 (10)                    |
| Gauffin, 2014 <sup>34</sup>                       | 150                         | Exercise therapy          | 54.5                | 27.3      | N                      | KOOS pain                       | 55 (18)                         | 58 (18)                    | KOOS ADL                        | 65 (18)            | 68 (22)                    |
| Herrlin, 2007 <sup>35</sup><br>2013 <sup>36</sup> | 96                          | Exercise therapy          | 54                  | 38.9      | N                      | KOOS pain                       | 56 (18)                         | 63 (21)                    | KOOS ADL                        | 68 (21)            | 73 (20)                    |
| Katz, 2013 <sup>37</sup>                          | 351                         | Exercise therapy          | 58.4                | 56.7      | Y                      | KOOS pain                       | 54 (16)                         | 53 (16)                    | WOMAC function                  | 37 (18)            | 38 (18)                    |
| Kirkley, 2008 <sup>38</sup>                       | 188                         | Exercise therapy          | 59.6                | 62.9      | Y                      | WOMAC pain                      | 52 (21)                         | 43 (24)                    | WOMAC function                  | 51 (21)            | 43 (23)                    |
| Kise, 2016 <sup>11</sup>                          | 140                         | Exercise therapy          | 49.6                | 39        | Y                      | KOOS pain                       | 68 (15)                         | 63 (21)                    | KOOS ADL                        | 80 (16)            | 75 (22)                    |
| Moseley, 2002 <sup>39</sup>                       | 119                         | Sham surgery              | 52.8                | 5         | Y                      | SF-36 body pain                 | 39 (19)                         | 38 (18)                    | SF-36 physical function         | 42 (22)            | 47 (23)                    |
| Osteras, 2012 <sup>40</sup>                       | 17                          | Exercise therapy          | 49.7                | 23.6      | N                      | VAS                             | 37 (10)                         | 35 (17)                    | NM                              | -                  | -                          |
| Saeed, 2015 <sup>41</sup>                         | 120                         | Hyaluronic acid injection | NR                  | 81.7      | NR                     | Knee society score <sup>3</sup> | NR                              | NR                         | Knee society score <sup>3</sup> | NR                 | NR                         |
| Sihvonen, 2013 <sup>58</sup>                      | 146                         | Sham surgery              | 52                  | 39        | N                      | VAS                             | 58 (20)                         | 61 (20)                    | Lysholm knee score <sup>3</sup> | NA                 | NA                         |
| Stensrud, 2015 <sup>43</sup>                      | 82                          | Exercise therapy          | 48.9                | 35.4      | N                      | Ordinal scale                   | NR                              | NR                         | Ordinal scale                   | NR                 | NR                         |
| Vermesan, 2013 <sup>44</sup>                      | 114                         | Steroid injection         | 58.4                | 79.2      | NR                     | Oxford knee score <sup>3</sup>  | NR                              | NR                         | Oxford knee score <sup>3</sup>  | NR                 | NR                         |
| Yim, 2013 <sup>45</sup>                           | 108                         | Exercise therapy          | 56.8                | 79.4      | N                      | VAS                             | 52 (18)                         | 49 (15)                    | Lysholm score <sup>3</sup>      | NA                 | NA                         |

ROA: Radiographic osteoarthritis, NR: not reported, NM: not measured, NA: not applicable

1. Based on Kellgren-Lawrence classification. Grades 2-4 were considered radiographic OA
2. All measures were converted to 0-100 scale. Higher scores mean less pain and better function
3. Instrument combines pain and function together

### *Effects of knee arthroscopy*

Table 2 presents the GRADE Summary of Findings for effects of knee arthroscopy compared to control. Patients who underwent arthroscopic surgery had a change in pain scores larger on average than patients who received control, both in the short (5.4 points on a 100-point scale, 95% CI 2.0; 8.8, n=10 studies, 1231 patients, Appendix Figure 1), and long-term (3.1 95% CI -0.2; 6.4, n= 8 studies, 1097 patients, Appendix Figure 2). The minimally important difference for this outcome measured with the index instrument (KOOS pain subscale) was 12 points.<sup>59</sup> Using the MIDs specific to each instrument,<sup>14</sup> 12.4% more patients receiving arthroscopy achieved an improvement in pain greater than the MID (n=11 studies, 1102 patients) in the short-term.

Over the first three months of follow-up, the median average of improvement in pain was 15 points in patients who received conservative management versus 20 points in patients who underwent knee arthroscopy; over the long term, the median average improvement 19 points in patients who received conservative management, versus 22 points in patients who underwent knee arthroscopy.

Patients who underwent arthroscopic surgery had an improvement in function score that was, on average, 4.9 points larger on a 100-point scale than patients who received control in the short-term (95% CI 1.5; 8.4, n= 7 studies, 964 patients, Appendix Figure 3), and 3.2 points larger (95% CI -0.5; 6.8, n= 6 studies, 843 patients Appendix Figure 4) in the long term. The minimally important difference for this outcome measured with the index instrument (KOOS ADL subscale) was 8 points.<sup>59</sup> The probability of achieving a change in function higher than the MID was 13.4% higher in patients receiving arthroscopy (n= 6 studies, 835 patients) in the short-term.

In the short term, patients who received conservative management achieved a median average improvement in function of 9 points, versus 14 points in patients who underwent knee arthroscopy; over the long term, the median average improvement was 10 points in patients who received conservative management, versus 13 points in patients who underwent knee arthroscopy.

We were able to perform subgroup analyses according to blinding of patients and proportion of patients with radiographic osteoarthritis >50% for both of these outcomes. None of the analyses showed differences in results between groups (Appendix Figures 5-12). All RCTs performed partial meniscectomy as part of the intervention when needed, and all used active comparators. Therefore, we did not perform subgroup analyses for these variables.

1  
2  
3  
4  
5 Sensitivity analyses showed that for both short-term pain and short-term function, results using the upper  
6 and lower limit of the MID estimate, and the approach using the standardized mean difference, in all  
7 cases yielded lower estimates of the numbers with important benefit from arthroscopy than did our  
8 primary analysis (Appendix 2).  
9  
10

11  
12  
13 Changes in QoL scores were similar between patients undergoing knee arthroscopy and patients receiving  
14 control. In the short-term, the difference in change from baseline scores was 6.0 points greater for knee  
15 arthroscopy (95% CI -1.5; 13.5, n= 1 study, 120 patients). In the long-term, the difference in change from  
16 baseline was 2.1 points (95% CI -1.0; 5.2, n= 2 studies, 269 patients, Appendix Figure 13). The MID for  
17 the index instrument (EQ5D) is 15 points.<sup>60</sup> The median average of improvement in QoL was 8.0 points  
18 in patients who received conservative management versus 14.0 points in patients who underwent knee  
19 arthroscopy in the short term; and 10.3 points in patients who received conservative management, versus  
20 12.4 points in patients who underwent knee arthroscopy.  
21  
22  
23  
24  
25  
26  
27

28 The risk of undergoing knee replacement up to 1 year after the intervention was 1.89 times higher in  
29 patients undergoing knee arthroscopy (95% CI 0.51; 7, n= 2 studies, 497 patients, Appendix Figure 14).  
30  
31  
32  
33  
34  
35  
36  
37  
38  
39  
40  
41  
42  
43  
44  
45  
46  
47  
48  
49  
50  
51  
52  
53  
54  
55  
56  
57  
58  
59  
60

Table 2: Summary of findings for the effects of knee arthroscopy versus control in patients with degenerative knee disease

| Outcome<br>Timeframe                                                                                  | Study results and<br>measurements                                                                                                                                                                                                                     | Absolute effect estimates                                                                                                                                                                                                                                                                                                                                           |                               | Certainty in effect estimates<br>(Quality of evidence)                                                     | Summary                                                                                                                                                 |
|-------------------------------------------------------------------------------------------------------|-------------------------------------------------------------------------------------------------------------------------------------------------------------------------------------------------------------------------------------------------------|---------------------------------------------------------------------------------------------------------------------------------------------------------------------------------------------------------------------------------------------------------------------------------------------------------------------------------------------------------------------|-------------------------------|------------------------------------------------------------------------------------------------------------|---------------------------------------------------------------------------------------------------------------------------------------------------------|
|                                                                                                       |                                                                                                                                                                                                                                                       | Conservative<br>management                                                                                                                                                                                                                                                                                                                                          | Arthroscopy                   |                                                                                                            |                                                                                                                                                         |
| <b>Short term</b>                                                                                     |                                                                                                                                                                                                                                                       |                                                                                                                                                                                                                                                                                                                                                                     |                               |                                                                                                            |                                                                                                                                                         |
| Pain (difference in<br>change from<br>baseline)<br>3 months                                           | Measured by: Different<br>instruments converted to<br>scale of index instrument<br>(KOOS pain sub scale)<br>Scale: 0-100 High better,<br>Minimally important<br>difference 12)<br>Data from 1231 patients in<br>10 studies<br>Follow up 3 months      | <b>15.0<br/>points (Mean)</b>                                                                                                                                                                                                                                                                                                                                       | <b>20.0<br/>points (Mean)</b> | <b>High</b>                                                                                                | On average, knee<br>arthroscopy results in very<br>small extra reduction in<br>pain scores when<br>compared to control                                  |
| Pain (difference in<br>patients who<br>achieve a change<br>higher than the<br>MID)<br>3 months        | Data from 1102 patients in 9<br>studies<br>Follow up 3 months                                                                                                                                                                                         | <b>669<br/>per 1000</b>                                                                                                                                                                                                                                                                                                                                             | <b>793<br/>per 1000</b>       | <b>High</b>                                                                                                | Knee arthroscopy<br>increases the number of<br>patients with an important<br>reduction in short-term<br>pain by approximately 12<br>in 100              |
| Function<br>(difference in<br>change from<br>baseline)<br>3 months                                    | Measured by: Different<br>instruments converted to<br>scale of index instrument<br>(KOOS ADL sub scale,<br>Scale: 0-100, High better<br>Minimally important<br>difference 8)<br>Based on data from 964<br>patients in 7 studies<br>Follow up 3 months | <b>9.0<br/>points (Mean)</b>                                                                                                                                                                                                                                                                                                                                        | <b>14.0<br/>points (Mean)</b> | <b>Moderate</b><br>Due to serious risk of bias, borderline<br>inconsistency, and borderline<br>imprecision | Knee arthroscopy may<br>increase function change<br>slightly more than control                                                                          |
| Function<br>(difference in<br>patients who<br>achieve a change<br>higher than the<br>MID)<br>3 months | Based on data from 835<br>patients in 6 studies<br>Follow up 3 months                                                                                                                                                                                 | <b>519<br/>per 1000</b>                                                                                                                                                                                                                                                                                                                                             | <b>653<br/>per 1000</b>       | <b>Moderate</b><br>Due to serious risk of bias                                                             | Knee arthroscopy<br>probably increases the<br>number of patients with an<br>important improvement in<br>short-term function<br>approximately 13 in 100. |
| Quality of life<br>(difference in<br>change from<br>baseline)<br>3 months                             | Measured by: EQ5D VAS-<br>Scale: 0-100 High better<br>Minimally important<br>difference 15<br>Based on data from 120<br>patients in 1 studies<br>Follow up 3 months                                                                                   | <b>8.0<br/>points (Mean)</b>                                                                                                                                                                                                                                                                                                                                        | <b>14.0<br/>points (Mean)</b> | <b>Low</b><br>Due to serious risk of bias, Due to<br>serious imprecision                                   | Knee arthroscopy may<br>have, on average, little or<br>no difference on QoL<br>change, compared to<br>control.                                          |
| Pain and function<br>up to 3 months                                                                   | Based on data from 316<br>patients in 3 studies<br>Follow up up to 3 months                                                                                                                                                                           | Three studies evaluated the effects of<br>knee arthroscopy in pain and function<br>using measures that combined these<br>two outcomes together or that could not<br>be pooled. One study reported a<br>difference in change from baseline in<br>the Oxford knee score that favoured<br>arthroscopy by 4.9 points (95% CI<br>3.61; 6.20, 114 patients) over steroids |                               | <b>Moderate</b><br>Due to serious risk of bias                                                             | Knee arthroscopy<br>probably has little or no<br>difference in pain and<br>function when compared<br>to control                                         |

|                                                                   |                                                                                                                                                                                                                                      |                                                                                                                                                                                                                                                                                                                                                                                  |                                                                           |                                                                                                                |
|-------------------------------------------------------------------|--------------------------------------------------------------------------------------------------------------------------------------------------------------------------------------------------------------------------------------|----------------------------------------------------------------------------------------------------------------------------------------------------------------------------------------------------------------------------------------------------------------------------------------------------------------------------------------------------------------------------------|---------------------------------------------------------------------------|----------------------------------------------------------------------------------------------------------------|
|                                                                   |                                                                                                                                                                                                                                      | injections. A second study reported no differences in the median in an overall self- assessment based on a 7-point ordinal scale (82 patients) when comparing knee arthroscopy to exercise therapy. The third study reported that patients who received intra-articular hyaluronic acid injections reported less pain than patients who received knee arthroscopy (120 patients) |                                                                           |                                                                                                                |
| <b>Long term</b>                                                  |                                                                                                                                                                                                                                      |                                                                                                                                                                                                                                                                                                                                                                                  |                                                                           |                                                                                                                |
| Pain (difference in change from baseline)<br>1-2 years            | Measured by: Different instruments converted to scale of index instrument (KOOS pain sub scale- Minimally Important Difference 12)<br>Scale: 0-100 High better<br>Based on data from 1097 patients in 8 studies<br>Follow up 2 years | <b>19.0 points (Mean)</b><br><b>22.0 points (Mean)</b><br><b>Difference: Mean Difference 3.13 more</b><br>(CI 95% 0.17 fewer - 6.43 more)                                                                                                                                                                                                                                        | <b>High</b>                                                               | On average, knee arthroscopy results in no difference, or a very small reduction, in pain                      |
| Function (difference in change from baseline)<br>1-2 years        | Measured by: Different instruments converted to scale of index instrument (KOOS ADL sub scale- Minimally Important Difference 8)<br>Scale: 0-100 High better<br>Based on data from 843 patients in 6 studies<br>Follow up 2 years    | <b>10.0 points (Mean)</b><br><b>13.0 points (Mean)</b><br><b>Difference: Mean Difference 3.16 more</b><br>(CI 95% 0.48 less - 6.8 more)                                                                                                                                                                                                                                          | <b>Moderate</b><br>Due to serious risk of bias and borderline imprecision | On average, knee arthroscopy probably does results in no improvement, or a very small improvement, in function |
| Quality of life (difference in change from baseline)<br>1-2 years | Measured by: EQ5D VAS, 15D (converted to EQ5D scale- MID 15)<br>Scale: 0-100 High better<br>Based on data from 269 patients in 2 studies<br>Follow up 1 year                                                                         | <b>10.3 points (Mean)</b><br><b>12.4 points (Mean)</b><br><b>Difference: Mean Difference 2.12 more</b><br>(CI 95% 0.96 fewer - 5.21 more)                                                                                                                                                                                                                                        | <b>High</b>                                                               | On average, knee arthroscopy does not result in an important improvement in quality of life                    |
| Knee replacement<br>1-2 years                                     | Relative risk: 1.89 (CI 95% 0.51 - 7.0)<br>Based on data from 497 patients in 2 studies<br>Follow up 1 year                                                                                                                          | <b>12 per 1000</b><br><b>23 per 1000</b><br><b>Difference: 11 more per 1000</b><br>(CI 95% 107 more - 6 fewer)                                                                                                                                                                                                                                                                   | <b>Moderate</b><br>Due to serious imprecision                             | On average, knee arthroscopy does not result in an increase in the risk of knee replacement                    |
| Pain and function<br>1-2 years                                    | Based on data from 114 patients in 1 studies<br>Follow up 1 year                                                                                                                                                                     | One study measured pain and function using a composite score. The study showed that patients who receive arthroscopy have a change in Oxford knee score 2.6 points higher than patients receiving steroids injections (95% CI 1.14; 4.06)                                                                                                                                        | <b>Moderate</b><br>Due to serious risk of bias                            | Knee arthroscopy probably has little or no difference on pain and function                                     |

*Certainty of the evidence*

There was high certainty in the estimates of effects for the outcome pain and moderate certainty in the estimates of effect for the outcome function. Although risk of bias due to lack of blinding that could affect the patient-reported outcomes was a concern in most of the trials, and the proportion of losses to follow-up was higher than desirable (Appendix Figure 15), for pain, trials with a low risk of bias reported similar

1  
2  
3 results to those in which there were risk of bias concerns (Appendix Figures 5 and 7). For function, there  
4 was less evidence from trials at low risk of bias, so we rated down our certainty in evidence for risk of  
5 bias (Appendix Figures 9 and 11)). In addition, the estimates for this outcome were imprecise. There was  
6 no evidence of publication bias (Appendix Figure 16)  
7  
8  
9

10  
11 The certainty of the estimates of quality of life was low in the short term due to risk of bias and  
12 imprecision, but high in the long term. The certainty of the estimates for knee replacement was moderate  
13 due to imprecision. Table 2 presents the details of the assessments per outcome.  
14  
15  
16

## 17 **Complications**

### 18 *Study Characteristics*

19  
20 The studies included in the complications systematic review reported data from a median of 20,770  
21 patients. Average patient age ranged from 42<sup>51</sup> to 62.4<sup>55</sup> years, and the proportion of females from 39%<sup>11</sup>  
22 to 64.6%.<sup>48</sup> Table 3 presents detailed study characteristics.  
23  
24  
25  
26  
27  
28  
29  
30  
31  
32  
33  
34  
35  
36  
37  
38  
39  
40  
41  
42  
43  
44  
45  
46  
47  
48  
49  
50  
51  
52  
53  
54  
55  
56  
57  
58  
59  
60



Table 3: Characteristics of studies included in systematic review of complications

| Study                          | Design                          | Number of patients | Age (mean) | % females |
|--------------------------------|---------------------------------|--------------------|------------|-----------|
| Basques, 2015 <sup>46</sup>    | Retrospective cohort (registry) | 17774              | 53         | 46.9      |
| Bohensky, 2014 <sup>47</sup>   | Retrospective cohort (registry) | 139031             | NR         | 42.5      |
| Cancienne, 2016 <sup>48</sup>  | Prospective cohort              | 173216             | NR         | 64.6      |
| Hame, 2012 <sup>49</sup>       | Retrospective cohort (registry) | 314578             | NR         | 62        |
| Hetsroni, 2011 <sup>50</sup>   | Retrospective cohort (registry) | 418323             | 45.5       | 46.8      |
| Hoppener, 2006 <sup>51</sup>   | Retrospective cohort (registry) | 335                | 42         | 43.3      |
| Jameson, 2011 <sup>52</sup>    | Retrospective cohort (registry) | 261446             | 46         | 40.7      |
| Katz, 2013 <sup>37</sup>       | RCT                             | 174                | 59         | 55.9      |
| Kise, 2016 <sup>11</sup>       | RCT                             | 70                 | 48.9       | 39        |
| Krych, 2015 <sup>53</sup>      | Retrospective cohort (registry) | 12595              | NR         | NR        |
| Maletis, 2012 <sup>54</sup>    | Retrospective cohort (registry) | 20770              | 44         | 42.8      |
| Sihvonen, 2013 <sup>58</sup>   | RCT                             | 70                 | 52         | 58        |
| Wai, 2002 <sup>55</sup>        | Retrospective cohort (registry) | 14391              | 62.4       | 49.9      |
| Yacub, 2009 <sup>56</sup>      | Retrospective cohort (registry) | 12426              | NR         | 57.3      |
| Yeranosian, 2013 <sup>57</sup> | Retrospective cohort (registry) | 432038             | NR         | NR        |

#### *Complications of knee arthroscopy*

Table 4 provides a GRADE Summary of Findings for the complications of knee arthroscopy. Patients who underwent knee arthroscopy have an extremely small risk of death that is (<1 in 1000 95% CI 0; 1, n= 7 studies, 454,086 patients, Appendix Figure 17); a risk of VTE of 5 in 1000 (95% CI 2; 10, n= 11 studies, 1 119 920 patients, Appendix Figure 18); a risk of infection of 2 in 1000 (95% CI 1; 4, n= 5 studies, 603 838 patients, Appendix Figure 19); and an extremely small risk of nerve damage (<1 in 1000 95% CI 0; 1, n=1 study, 12 426 patients).

Table 4: Summary of findings for the complications of knee arthroscopy versus control in patients with degenerative knee disease

| Outcome<br>Timeframe               | Study results and<br>measurements                                       | Absolute effect estimates  |               | Certainty in effect estimates<br>(Quality of evidence)                  | Summary                                                      |
|------------------------------------|-------------------------------------------------------------------------|----------------------------|---------------|-------------------------------------------------------------------------|--------------------------------------------------------------|
|                                    |                                                                         | Conservative<br>management | Arthroscopy   |                                                                         |                                                              |
| Mortality<br>3 months              | Based on data from 454086 patients in 7 studies<br>Follow up 3 months   | 0<br>per 1000              | 0<br>per 1000 | <b>Low</b><br>Due to serious risk of bias and serious inconsistency     | Arthroscopy may have an extremely small risk of mortality    |
| Venous thromboembolism<br>3 months | Based on data from 1119920 patients in 11 studies<br>Follow up 3 months | 0<br>per 1000              | 5<br>per 1000 | <b>Low</b><br>Due to serious risk of bias, Due to serious inconsistency | Arthroscopy may have a small risk for venous thromboembolism |
| Infection<br>3 months              | Based on data from 603838 patients in 5 studies<br>Follow up 3 months   | 0<br>per 1000              | 2<br>per 1000 | <b>Low</b><br>Due to serious risk of bias, Due to serious inconsistency | Arthroscopy may have a very small risk for infection         |
| Nerve damage<br>3 months           | Based on data from 12426 patients in 1 studies<br>Follow up 3 months    | 0<br>per 1000              | 0<br>per 1000 | <b>Low</b><br>Due to serious risk of bias, Due to serious indirectness  | Arthroscopy may have an extremely small risk of nerve damage |

### *Certainty of the evidence*

The estimates of complications of knee arthroscopy had low certainty. All studies suffered from risk of bias concerns, mainly due to the retrospective nature of the data collection (using data that had not been collected for the purposes of the study) (Appendix Figure 20). The studies informing mortality, VTE and infection showed inconsistent results from both a clinical and statistical perspective, which resulted in rating down the certainty for the pooled estimate. Finally, the only study informing nerve damage included patients with arthroscopy of the shoulder as well,<sup>56</sup> and therefore warranted rating down this estimate for indirectness. There was no evidence of publication bias (Appendix Figure 21). Table 4 presents details regarding the assessments of the certainty of the complications of knee arthroscopy per outcome.

## **DISCUSSION**

This systematic review provides high quality evidence that patients with degenerative knee disease who undergo arthroscopy experience, on average, very small benefits in pain, function, and quality of life over

1  
2  
3 periods of up to three months when compared to patients who receive a conservative management  
4 strategy (Table 2). Results up to two years failed to show benefits in pain or function, and excluded any  
5 but very small benefits (Table 2). The median of the average pain change in patients receiving  
6 conservative management was 15 points in the short-term and 19 points in the long term (MID 12 points).  
7  
8 Thus, whether patients receive arthroscopy or not, the clinical trial experience suggests, on average, a  
9 small benefit in pain reduction over both the short and long term.  
10  
11  
12

13  
14 The results for function proved similar, with very small average differences in the short term, and no  
15 convincing evidence of benefit in the long term (Table 2). Patients who received a conservative  
16 management strategy had a median average change of 9 points in the short term and 10 points in the long  
17 term, corresponding (minimally important difference 8 points). Risk of bias limitations leave this  
18 evidence less secure (moderate quality) than for pain.  
19  
20  
21  
22

23  
24 Study results provide high quality evidence that the benefits of arthroscopic surgery on quality of life over  
25 the long term are minimal, if they exist at all (Table 2). Low quality evidence raises the possibility of a  
26 higher risk of knee replacement with arthroscopic surgery.  
27  
28  
29

30  
31 We found a low risk of serious adverse effects in patients undergoing knee arthroscopy. The risk of  
32 mortality and nerve damage may be close to 0, while the risk of VTE and infection may be 5 and 2 in  
33 1000 patients, respectively. We have low certainty in this evidence, however, because the studies included  
34 were likely to be biased and showed results that were inconsistent.  
35  
36  
37

38  
39 Our systematic review has particular strengths. First, it provides the most comprehensive and trustworthy  
40 body of evidence up to date, including 10 studies not included in the most recent prior review.<sup>13</sup> While the  
41 conclusions of our systematic review may not be qualitatively different from the conclusions of previous  
42 reviews addressing the same question, we believe that all the additions in terms of studies included and  
43 methods for summarizing, presenting, and appraising the evidence strengthen the conclusions derived  
44 from this body of evidence considerably. Second, this systematic review was developed in parallel with a  
45 BMJ Rapid Recommendation according to predefined standards, methods and processes.<sup>10</sup> Extensive  
46 input from content experts and patients in the guideline panel throughout the process secured appropriate  
47 selection of outcomes and analyses as well as appropriate interpretation of the results from the systematic  
48 review. The Rapid Recommendations published together with our linked systematic review should  
49 provide clinicians and their patients with optimal guidance in practice and will also allow other guideline  
50 organizations to re-use or adapt content to their contexts, if needed. Third, by converting all the  
51  
52  
53  
54  
55  
56  
57  
58  
59  
60

1  
2  
3 instruments to the scale of an index instrument we do not only overcome the potential limitations of using  
4 the standardized mean difference (namely, the analysis depending on a similar standard deviation across  
5 studies, and the resulting measure of effect being difficult to interpret), but also provide an estimate of the  
6 proportion of patients who would achieve a minimally important change per arm, and the difference  
7 between these proportions. This allows incorporating patients' values and preferences explicitly when  
8 interpreting the results. A rigorous linked systematic review of studies addressing the issue informed our  
9 estimates of the minimally important change<sup>14</sup> and our results were robust to accounting for the  
10 uncertainty in the MID, as well as to calculating the proportion who might benefit using an approach  
11 relying on the standardized mean difference. Fourth, we provide an explicit and transparent assessment  
12 of the certainty in the absolute estimates of effect, which considers limitations of the evidence with  
13 regards to risk of bias, inconsistency, imprecision, indirectness, and publication bias.<sup>61</sup>  
14  
15  
16  
17  
18  
19  
20  
21  
22

23 Our review is limited by suboptimal reporting in many of the original studies, requiring imputing standard  
24 deviations and, in a number of studies, estimating correlations between baseline and follow-up. It is  
25 possible that there is a subgroup of patients – for instance, those with locking symptoms – who do achieve  
26 substantial benefit from arthroscopic knee surgery. The available studies do not, however, provide  
27 evidence of any such subgroup. The burden of proof now rests with those who claim that such a  
28 subpopulation exists, with compelling RCT evidence required to substantiate the claim.  
29  
30  
31  
32  
33

34 In summary, our results provide low quality evidence that knee arthroscopy is a safe procedure with a low  
35 risk of complications and moderate to high quality evidence that the procedure provides very small  
36 benefits in pain and function over conservative therapy in the short term. The evidence fails to support a  
37 persistence of these benefits over the long term. Patients and their health care providers must trade off the  
38 marginal short term benefits against the burden of the surgical procedure (pain, swelling, limited mobility,  
39 restriction of activities, over a period of 2 to 6 weeks).  
40  
41  
42  
43  
44

45 **FUNDING:** This research received no specific grant from any funding agency in the public, commercial,  
46 or not-for-profit sectors. RB is funded by an Australian National Health and Medical Research Council  
47 (NHMRC) Senior Principal Research Fellowship.  
48  
49  
50  
51

52 **CONTRIBUTORSHIP STATEMENT:** GHG and POV conceived the study idea. RBP performed the  
53 literature search. SS, BS, YC, NE and RBP performed screening, data abstraction and risk of bias  
54 assessments. RBP performed the data analysis. RBP, RB and GHG interpreted the data analysis. RBP  
55 and GHG interpreted the data performed certainty of evidence assessments. RBP wrote the first draft of  
56  
57  
58  
59  
60

1  
2  
3 the manuscript. GHG, POV, RB, and RP critically revised the manuscript. All authors approved the final  
4 version of the manuscript. RBP had full access to all of the data in the study, and takes responsibility for  
5 the integrity of the data and the accuracy of the data analysis. RBP is guarantor.  
6  
7  
8

9  
10 **ACKNOWLEDGMENTS:** We thank members of the Rapid Recommendations panel for critical  
11 feedback on outcome and subgroup selection, GRADE judgments, and manuscript feedback, including  
12 Reed Siemieniuk (panel chair and internist), Ian A. Harris (orthopaedic surgeon), Martin Englund  
13 (epidemiologist), Casey Quinlan (patient representative), (patient representative), Hazel M Wilson  
14 (patient representative), Anne Lydiatt (patient representative), Lyubov Lytvyn (patient liaison expert),  
15 Nina Rydland (physiotherapist), Stijn van de Welde (physiotherapist), Thomas Agoritsas (methodologist,  
16 internist) and Annette Kristiansen (methods editor and internist).  
17  
18  
19  
20  
21

22  
23 **COMPETING INTERESTS:** All authors have completed the ICMJE uniform disclosure form at  
24 [www.icmje.org/coi\\_disclosure.pdf](http://www.icmje.org/coi_disclosure.pdf) and declare: no support from any organization for the submitted work;  
25 no financial relationships with any organizations that might have an interest in the submitted work in the  
26 previous three years; no other financial relationships that could appear to have influenced the submitted  
27 work.  
28  
29  
30  
31

32 **ETHICAL APPROVAL:** Not required.  
33  
34

35  
36 **TRANSPARENCY DECLARATION:** RBP affirms that the manuscript is an honest, accurate, and  
37 transparent account of the study being reported; that no important aspects of the study have been omitted;  
38 and that any discrepancies from the study as planned have been explained.  
39  
40  
41

42 **DATA SHARING STATEMENT:** Extra data is available in the publication of the BMJ Rapid  
43 Recommendation in MAGICapp.  
44  
45  
46  
47  
48  
49  
50  
51  
52  
53  
54  
55  
56  
57  
58  
59  
60

1  
2  
3  
4  
5  
6  
7  
8  
9  
10  
11  
12  
13  
14  
15  
16  
17  
18  
19  
20  
21  
22  
23  
24  
25  
26  
27  
28  
29  
30  
31  
32  
33  
34  
35  
36  
37  
38  
39  
40  
41  
42  
43  
44  
45  
46  
47  
48  
49  
50  
51  
52  
53  
54  
55  
56  
57  
58  
59  
60

For peer review only

## References

1. Mahir L, Belhaj K, Zahi S, et al. Impact of knee osteoarthritis on the quality of life. *Annals of physical and rehabilitation medicine* 2016;59s:e159. doi: 10.1016/j.rehab.2016.07.355 [published Online First: 2016/09/28]
2. Alkan BM, Fidan F, Tosun A, et al. Quality of life and self-reported disability in patients with knee osteoarthritis. *Modern rheumatology / the Japan Rheumatism Association* 2014;24(1):166-71. doi: 10.3109/14397595.2013.854046 [published Online First: 2013/11/23]
3. Lawrence RC, Felson DT, Helmick CG, et al. Estimates of the prevalence of arthritis and other rheumatic conditions in the United States. Part II. *Arthritis and rheumatism* 2008;58(1):26-35. doi: 10.1002/art.23176 [published Online First: 2008/01/01]
4. Cullen KA, Hall MJ, Golosinskiy A. Ambulatory surgery in the United States, 2006. *National health statistics reports* 2009(11):1-25. [published Online First: 2009/03/20]
5. Jevsevar DS, Brown GA, Jones DL, et al. The American Academy of Orthopaedic Surgeons evidence-based guideline on: treatment of osteoarthritis of the knee, 2nd edition. *The Journal of bone and joint surgery American volume* 2013;95(20):1885-6. [published Online First: 2013/11/30]
6. Brown GA. AAOS clinical practice guideline: treatment of osteoarthritis of the knee: evidence-based guideline, 2nd edition. *The Journal of the American Academy of Orthopaedic Surgeons* 2013;21(9):577-9. doi: 10.5435/jaaos-21-09-577 [published Online First: 2013/09/03]
7. Krych AJ, Carey JL, Marx RG, et al. Does arthroscopic knee surgery work? *Arthroscopy : the journal of arthroscopic & related surgery : official publication of the Arthroscopy Association of North America and the International Arthroscopy Association* 2014;30(5):544-5. doi: 10.1016/j.arthro.2014.02.012 [published Online First: 2014/03/20]
8. Zhang W, Moskowitz RW, Nuki G, et al. OARSI recommendations for the management of hip and knee osteoarthritis, part I: critical appraisal of existing treatment guidelines and systematic review of current research evidence. *Osteoarthritis and cartilage / OARS, Osteoarthritis Research Society* 2007;15(9):981-1000. doi: 10.1016/j.joca.2007.06.014 [published Online First: 2007/08/28]
9. Vandvik PO, Otto CM, Siemieniuk RA, et al. For those with severe, symptomatic aortic stenosis is transcatheter or open surgical aortic valve replacement in those at low to intermediate risk surgical risk? A clinical practice guideline. *BMJ* (Co-submission)
10. Siemieniuk RA, Agoritsas T, Macdonald H, et al. Introduction to BMJ Rapid Recommendations. *BMJ (Clinical research ed)* 2016;354:i5191. doi: 10.1136/bmj.i5191 [published Online First: 2016/09/30]
11. Kise NJ, Risberg MA, Stensrud S, et al. Exercise therapy versus arthroscopic partial meniscectomy for degenerative meniscal tear in middle aged patients: randomised controlled trial with two year follow-up. *BMJ (Clinical research ed)* 2016;354:i3740. doi: 10.1136/bmj.i3740 [published Online First: 2016/07/22]
12. Khan M, Evaniew N, Bedi A, et al. Arthroscopic surgery for degenerative tears of the meniscus: a systematic review and meta-analysis. *CMAJ : Canadian Medical Association journal = journal de l'Association medicale canadienne* 2014;186(14):1057-64. doi: 10.1503/cmaj.140433 [published Online First: 2014/08/27]
13. Thorlund JB, Juhl CB, Roos EM, et al. Arthroscopic surgery for degenerative knee: systematic review and meta-analysis of benefits and harms. *BMJ (Clinical research ed)* 2015;350:h2747. doi: 10.1136/bmj.h2747 [published Online First: 2015/06/17]
14. Devji T, Guyatt G, Lytvyn L, et al. Application of Minimal Important Differences in Degenerative Knee Disease Outcomes: A Systematic Review and Case Study to Inform BMJ Rapid Recommendations. *BMJ OPEN (Submitted for publication)* 2016
15. Thorlund K, Walter SD, Johnston BC, et al. Pooling health-related quality of life outcomes in meta-analysis-a tutorial and review of methods for enhancing interpretability. *Research synthesis methods* 2011;2(3):188-203. doi: 10.1002/jrsm.46 [published Online First: 2011/09/01]
16. Juhl C, Lund H, Roos EM, et al. A hierarchy of patient-reported outcomes for meta-analysis of knee osteoarthritis trials: empirical evidence from a survey of high impact journals. *Arthritis* 2012;2012:136245. doi: 10.1155/2012/136245 [published Online First: 2012/07/14]
17. Tikkinen KA, Agarwal A, Craigie S, et al. Systematic reviews of observational studies of risk of thrombosis and bleeding in urological surgery (ROTBUS): introduction and methodology. *Systematic reviews* 2014;3:150. doi: 10.1186/2046-4053-3-150 [published Online First: 2014/12/30]

18. Wan X, Wang W, Liu J, et al. Estimating the sample mean and standard deviation from the sample size, median, range and/or interquartile range. *BMC medical research methodology* 2014;14:135. doi: 10.1186/1471-2288-14-135 [published Online First: 2014/12/20]
19. Hartung J, Knapp G. On tests of the overall treatment effect in meta-analysis with normally distributed responses. *Statistics in medicine* 2001;20(12):1771-82. doi: 10.1002/sim.791 [published Online First: 2001/06/15]
20. Sidik K, Jonkman JN. A simple confidence interval for meta-analysis. *Statistics in medicine* 2002;21(21):3153-9. doi: 10.1002/sim.1262 [published Online First: 2002/10/11]
21. Stijnen T, Hamza TH, Ozdemir P. Random effects meta-analysis of event outcome in the framework of the generalized linear mixed model with applications in sparse data. *Statistics in medicine* 2010;29(29):3046-67. doi: 10.1002/sim.4040 [published Online First: 2010/09/10]
22. R: A language and environment for statistical computing [program]. Vienna, Austria: R Foundation for Statistical Computing, 2016.
23. Guyatt GH, Oxman AD, Vist GE, et al. GRADE: an emerging consensus on rating quality of evidence and strength of recommendations. *BMJ (Clinical research ed)* 2008;336(7650):924-6. doi: 10.1136/bmj.39489.470347.AD [published Online First: 2008/04/26]
24. Guyatt GH, Oxman AD, Kunz R, et al. GRADE guidelines: 7. Rating the quality of evidence--inconsistency. *Journal of clinical epidemiology* 2011;64(12):1294-302. doi: 10.1016/j.jclinepi.2011.03.017 [published Online First: 2011/08/02]
25. Guyatt GH, Oxman AD, Kunz R, et al. GRADE guidelines 6. Rating the quality of evidence--imprecision. *Journal of clinical epidemiology* 2011;64(12):1283-93. doi: 10.1016/j.jclinepi.2011.01.012 [published Online First: 2011/08/16]
26. Guyatt GH, Oxman AD, Kunz R, et al. GRADE guidelines: 8. Rating the quality of evidence--indirectness. *Journal of clinical epidemiology* 2011;64(12):1303-10. doi: 10.1016/j.jclinepi.2011.04.014 [published Online First: 2011/08/02]
27. Guyatt GH, Oxman AD, Montori V, et al. GRADE guidelines: 5. Rating the quality of evidence--publication bias. *Journal of clinical epidemiology* 2011;64(12):1277-82. doi: 10.1016/j.jclinepi.2011.01.011 [published Online First: 2011/08/02]
28. GH G, JW B. Modification of Cochrane Tool to assess risk of bias in randomized trials [Available from: <http://distillercer.com/resources/2016>].
29. Slim K, Nini E, Forestier D, et al. Methodological index for non-randomized studies (minors): development and validation of a new instrument. *ANZ journal of surgery* 2003;73(9):712-6. [published Online First: 2003/09/06]
30. Siemieniuk RA, Harris IA, Agoritsas T, et al. Arthroscopic surgery for degenerative knee disease: a clinical practice guideline. *Bmj* 2016
31. Guyatt G, Oxman AD, Akl EA, et al. GRADE guidelines: 1. Introduction-GRADE evidence profiles and summary of findings tables. *Journal of clinical epidemiology* 2011;64(4):383-94. doi: 10.1016/j.jclinepi.2010.04.026 [published Online First: 2011/01/05]
32. Vandvik PO, Brandt L, Alonso-Coello P, et al. Creating clinical practice guidelines we can trust, use, and share: a new era is imminent. *Chest* 2013;144(2):381-9. doi: 10.1378/chest.13-0746 [published Online First: 2013/08/07]
33. Chang RW, Falconer J, Stulberg SD, et al. A randomized, controlled trial of arthroscopic surgery versus closed-needle joint lavage for patients with osteoarthritis of the knee. *Arthritis and rheumatism* 1993;36(3):289-96. [published Online First: 1993/03/01]
34. Gauffin H, Tagesson S, Meunier A, et al. Knee arthroscopic surgery is beneficial to middle-aged patients with meniscal symptoms: a prospective, randomised, single-blinded study. *Osteoarthritis and cartilage / OARS, Osteoarthritis Research Society* 2014;22(11):1808-16. doi: 10.1016/j.joca.2014.07.017 [published Online First: 2014/08/03]
35. Herrlin S, Hallander M, Wange P, et al. Arthroscopic or conservative treatment of degenerative medial meniscal tears: a prospective randomised trial. *Knee surgery, sports traumatology, arthroscopy : official journal of the ESSKA* 2007;15(4):393-401. doi: 10.1007/s00167-006-0243-2 [published Online First: 2007/01/12]
36. Herrlin SV, Wange PO, Lapidus G, et al. Is arthroscopic surgery beneficial in treating non-traumatic, degenerative medial meniscal tears? A five year follow-up. *Knee surgery, sports traumatology, arthroscopy : official journal of the ESSKA* 2013;21(2):358-64. doi: 10.1007/s00167-012-1960-3 [published Online First: 2012/03/23]



- 1  
2  
3 37. Katz JN, Brophy RH, Chaisson CE, et al. Surgery versus physical therapy for a meniscal tear and osteoarthritis.  
4 *The New England journal of medicine* 2013;368(18):1675-84. doi: 10.1056/NEJMoa1301408 [published  
5 Online First: 2013/03/20]
- 6 38. Kirkley A, Birmingham TB, Litchfield RB, et al. A randomized trial of arthroscopic surgery for osteoarthritis of  
7 the knee. *The New England journal of medicine* 2008;359(11):1097-107. doi: 10.1056/NEJMoa0708333  
8 [published Online First: 2008/09/12]
- 9 39. Moseley JB, O'Malley K, Petersen NJ, et al. A controlled trial of arthroscopic surgery for osteoarthritis of the  
10 knee. *The New England journal of medicine* 2002;347(2):81-8. doi: 10.1056/NEJMoa013259 [published  
11 Online First: 2002/07/12]
- 12 40. Osteras H, Osteras B, Torstensen TA. Medical exercise therapy, and not arthroscopic surgery, resulted in  
13 decreased depression and anxiety in patients with degenerative meniscus injury. *Journal of bodywork and*  
14 *movement therapies* 2012;16(4):456-63. doi: 10.1016/j.jbmt.2012.04.003 [published Online First:  
15 2012/10/06]
- 16 41. Saeed K, Khan SA, Ahmed I. Efficacy of intra articular hyaluronic acid versus arthroscopic debridement in  
17 terms of improvement in pain score in Kellgran -Lawrence Grading II & III osteoarthritis of knee joint.  
18 *Pakistan Journal of Medical and Health Sciences* 2015;9(3):1011-15.
- 19 42. Sihvonen R, Paavola M, Malmivaara A, et al. Arthroscopic partial meniscectomy versus sham surgery for a  
20 degenerative meniscal tear. *N Engl J Med* 2013;369(26):2515-24. doi: 10.1056/NEJMoa1305189
- 21 43. Stensrud S, Risberg MA, Roos EM. Effect of exercise therapy compared with arthroscopic surgery on knee  
22 muscle strength and functional performance in middle-aged patients with degenerative meniscus tears: a 3-  
23 mo follow-up of a randomized controlled trial. *American journal of physical medicine & rehabilitation /*  
24 *Association of Academic Physiatrists* 2015;94(6):460-73. doi:  
25 <http://dx.doi.org/10.1097/PHM.0000000000000209>
- 26 44. Vermesan D, Prejbeanu R, Laitin S, et al. Arthroscopic debridement compared to intra-articular steroids in  
27 treating degenerative medial meniscal tears. *European review for medical and pharmacological sciences*  
28 2013;17(23):3192-6. [published Online First: 2013/12/18]
- 29 45. Yim JH, Seon JK, Song EK, et al. A comparative study of meniscectomy and nonoperative treatment for  
30 degenerative horizontal tears of the medial meniscus. *The American journal of sports medicine*  
31 2013;41(7):1565-70. doi: 10.1177/0363546513488518 [published Online First: 2013/05/25]
- 32 46. Basques BA, Gardner EC, Varthi AG, et al. Risk factors for short-term adverse events and readmission after  
33 arthroscopic meniscectomy: does age matter? *The American journal of sports medicine* 2015;43(1):169-75.  
34 doi: 10.1177/0363546514551923 [published Online First: 2014/10/09]
- 35 47. Bohensky MA, Ademi Z, deSteiger R, et al. Quantifying the excess cost and resource utilisation for patients with  
36 complications associated with elective knee arthroscopy: a retrospective cohort study. *The Knee*  
37 2014;21(2):491-6. doi: 10.1016/j.knee.2013.11.009 [published Online First: 2013/12/18]
- 38 48. Cancienne JM, Gwathmey FW, Werner BC. Intraoperative Corticosteroid Injection at the Time of Knee  
39 Arthroscopy Is Associated With Increased Postoperative Infection Rates in a Large Medicare Population.  
40 *Arthroscopy : the journal of arthroscopic & related surgery : official publication of the Arthroscopy*  
41 *Association of North America and the International Arthroscopy Association* 2016;32(1):90-5. doi:  
42 10.1016/j.arthro.2015.09.003 [published Online First: 2015/11/11]
- 43 49. Hame SL, Nguyen V, Ellerman J, et al. Complications of arthroscopic meniscectomy in the older population.  
44 *The American journal of sports medicine* 2012;40(6):1402-5. doi: 10.1177/0363546512443043 [published  
45 Online First: 2012/04/13]
- 46 50. Hetsroni I, Lyman S, Do H, et al. Symptomatic pulmonary embolism after outpatient arthroscopic procedures of  
47 the knee: the incidence and risk factors in 418,323 arthroscopies. *The Journal of bone and joint surgery*  
48 *British volume* 2011;93(1):47-51. doi: 10.1302/0301-620x.93b1.25498 [published Online First:  
49 2011/01/05]
- 50 51. Hoppener MR, Ettema HB, Henny CP, et al. Low incidence of deep vein thrombosis after knee arthroscopy  
51 without thromboprophylaxis: a prospective cohort study of 335 patients. *Acta orthopaedica*  
52 2006;77(5):767-71. doi: 10.1080/17453670610012962 [published Online First: 2006/10/28]
- 53 52. Jameson SS, Dowen D, James P, et al. The burden of arthroscopy of the knee: a contemporary analysis of data  
54 from the English NHS. *The Journal of bone and joint surgery British volume* 2011;93(10):1327-33. doi:  
55 10.1302/0301-620x.93b10.27078 [published Online First: 2011/10/05]
- 56 53. Krych AJ, Sousa PL, Morgan JA, et al. Incidence and Risk Factor Analysis of Symptomatic Venous  
57 Thromboembolism After Knee Arthroscopy. *Arthroscopy : the journal of arthroscopic & related surgery :*  
58  
59  
60

- 1  
2  
3       *official publication of the Arthroscopy Association of North America and the International Arthroscopy*  
4       *Association* 2015;31(11):2112-8. doi: 10.1016/j.arthro.2015.04.091 [published Online First: 2015/06/25]  
5 54. Maletis GB, Inacio MC, Reynolds S, et al. Incidence of symptomatic venous thromboembolism after elective  
6       knee arthroscopy. *The Journal of bone and joint surgery American volume* 2012;94(8):714-20. doi:  
7       10.2106/jbjs.j.01759 [published Online First: 2012/04/21]  
8 55. Wai EK, Kreder HJ, Williams JL. Arthroscopic debridement of the knee for osteoarthritis in patients fifty years  
9       of age or older: utilization and outcomes in the Province of Ontario. *The Journal of bone and joint surgery*  
10       *American volume* 2002;84-a(1):17-22. [published Online First: 2002/01/17]  
11 56. Yacub JN, Rice JB, Dillingham TR. Nerve injury in patients after hip and knee arthroplasties and knee  
12       arthroscopy. *Am J Phys Med Rehabil* 2009;88(8):635-41; quiz 42-4, 91. doi:  
13       10.1097/PHM.0b013e3181ae0c9d [published Online First: 2009/07/22]  
14 57. Yerasosian MG, Petrigliano FA, Terrell RD, et al. Incidence of postoperative infections requiring reoperation  
15       after arthroscopic knee surgery. *Arthroscopy : the journal of arthroscopic & related surgery : official*  
16       *publication of the Arthroscopy Association of North America and the International Arthroscopy*  
17       *Association* 2013;29(8):1355-61. doi: 10.1016/j.arthro.2013.05.007 [published Online First: 2013/08/03]  
18 58. Sihvonen R, Paavola M, Malmivaara A, et al. Arthroscopic partial meniscectomy versus sham surgery for a  
19       degenerative meniscal tear. *The New England journal of medicine* 2013;369(26):2515-24. doi:  
20       10.1056/NEJMoa1305189 [published Online First: 2013/12/27]  
21 59. Mills KA, Naylor JM, Eyles JP, et al. Examining the Minimal Important Difference of Patient-reported Outcome  
22       Measures for Individuals with Knee Osteoarthritis: A Model Using the Knee Injury and Osteoarthritis  
23       Outcome Score. *The Journal of rheumatology* 2016;43(2):395-404. doi: 10.3899/jrheum.150398 [published  
24       Online First: 2016/01/17]  
25 60. Walters SJ, Brazier JE. Comparison of the minimally important difference for two health state utility measures:  
26       EQ-5D and SF-6D. *Quality of Life Research* 2005;14(6):1523-32.  
27 61. Balshem H, Helfand M, Schunemann HJ, et al. GRADE guidelines: 3. Rating the quality of evidence. *Journal of*  
28       *clinical epidemiology* 2011;64(4):401-6. doi: 10.1016/j.jclinepi.2010.07.015 [published Online First:  
29       2011/01/07]  
30  
31  
32  
33  
34  
35  
36  
37  
38  
39  
40  
41  
42  
43  
44  
45  
46  
47  
48  
49  
50  
51  
52  
53  
54  
55  
56  
57  
58  
59  
60

1  
2  
3 **FIGURES LEGENDS**  
4

5  
6 Figure 1: Study selection process  
7  
8  
9  
10  
11  
12  
13  
14  
15  
16  
17  
18  
19  
20  
21  
22  
23  
24  
25  
26  
27  
28  
29  
30  
31  
32  
33  
34  
35  
36  
37  
38  
39  
40  
41  
42  
43  
44  
45  
46  
47  
48  
49  
50  
51  
52  
53  
54  
55  
56  
57  
58  
59  
60

For peer review only

1  
2  
3  
4  
5  
6  
7  
8  
9  
10  
11  
12  
13  
14  
15  
16  
17  
18  
19  
20  
21  
22  
23  
24  
25  
26  
27  
28  
29  
30  
31  
32  
33  
34  
35  
36  
37  
38  
39  
40  
41  
42  
43  
44  
45  
46  
47  
48  
49  
50  
51  
52  
53  
54  
55  
56  
57  
58  
59  
60

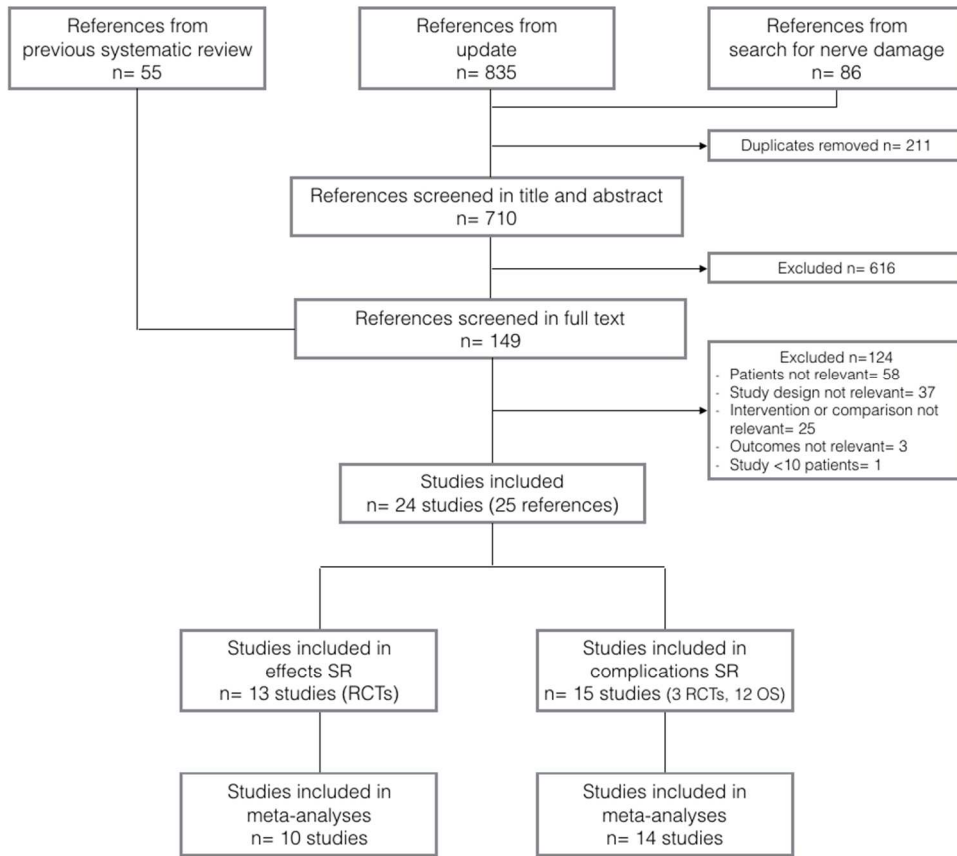

Study selection process  
Figure 1  
346x306mm (72 x 72 DPI)

only

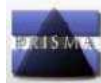

# PRISMA 2009 Checklist

1  
2  
3  
4  
5  
6  
7  
8  
9  
10  
11  
12  
13  
14  
15  
16  
17  
18  
19  
20  
21  
22  
23  
24  
25  
26  
27  
28  
29  
30  
31  
32  
33  
34  
35  
36  
37  
38  
39  
40  
41  
42  
43  
44  
45  
46  
47  
48  
49

| Section/topic                      | #  | Checklist item                                                                                                                                                                                                                                                                                              | Reported on page # |
|------------------------------------|----|-------------------------------------------------------------------------------------------------------------------------------------------------------------------------------------------------------------------------------------------------------------------------------------------------------------|--------------------|
| <b>TITLE</b>                       |    |                                                                                                                                                                                                                                                                                                             |                    |
| Title                              | 1  | Identify the report as a systematic review, meta-analysis, or both.                                                                                                                                                                                                                                         | 1                  |
| <b>ABSTRACT</b>                    |    |                                                                                                                                                                                                                                                                                                             |                    |
| Structured summary                 | 2  | Provide a structured summary including, as applicable: background; objectives; data sources; study eligibility criteria, participants, and interventions; study appraisal and synthesis methods; results; limitations; conclusions and implications of key findings; systematic review registration number. | 2                  |
| <b>INTRODUCTION</b>                |    |                                                                                                                                                                                                                                                                                                             |                    |
| Rationale                          | 3  | Describe the rationale for the review in the context of what is already known.                                                                                                                                                                                                                              | 4-5                |
| Objectives                         | 4  | Provide an explicit statement of questions being addressed with reference to participants, interventions, comparisons, outcomes, and study design (PICOS).                                                                                                                                                  | 5                  |
| <b>METHODS</b>                     |    |                                                                                                                                                                                                                                                                                                             |                    |
| Protocol and registration          | 5  | Indicate if a review protocol exists, if and where it can be accessed (e.g., Web address), and, if available, provide registration information including registration number.                                                                                                                               | 3,5                |
| Eligibility criteria               | 6  | Specify study characteristics (e.g., PICOS, length of follow-up) and report characteristics (e.g., years considered, language, publication status) used as criteria for eligibility, giving rationale.                                                                                                      | 5,6                |
| Information sources                | 7  | Describe all information sources (e.g., databases with dates of coverage, contact with study authors to identify additional studies) in the search and date last searched.                                                                                                                                  | 6                  |
| Search                             | 8  | Present full electronic search strategy for at least one database, including any limits used, such that it could be repeated.                                                                                                                                                                               | 26-28              |
| Study selection                    | 9  | State the process for selecting studies (i.e., screening, eligibility, included in systematic review, and, if applicable, included in the meta-analysis).                                                                                                                                                   | 6                  |
| Data collection process            | 10 | Describe method of data extraction from reports (e.g., piloted forms, independently, in duplicate) and any processes for obtaining and confirming data from investigators.                                                                                                                                  | 6-7                |
| Data items                         | 11 | List and define all variables for which data were sought (e.g., PICOS, funding sources) and any assumptions and simplifications made.                                                                                                                                                                       | 6-7                |
| Risk of bias in individual studies | 12 | Describe methods used for assessing risk of bias of individual studies (including specification of whether this was done at the study or outcome level), and how this information is to be used in any data synthesis.                                                                                      | 8                  |
| Summary measures                   | 13 | State the principal summary measures (e.g., risk ratio, difference in means).                                                                                                                                                                                                                               | 7                  |
| Synthesis of results               | 14 | Describe the methods of handling data and combining results of studies, if done, including measures of consistency (e.g., $I^2$ for each meta-analysis).                                                                                                                                                    | 7-8                |

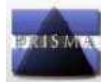

# PRISMA 2009 Checklist

Page 1 of 2

| Section/topic                                                                                                                              | #  | Checklist item                                                                                                                                                                                           | Reported on page #                |
|--------------------------------------------------------------------------------------------------------------------------------------------|----|----------------------------------------------------------------------------------------------------------------------------------------------------------------------------------------------------------|-----------------------------------|
| Risk of bias across studies                                                                                                                | 15 | Specify any assessment of risk of bias that may affect the cumulative evidence (e.g., publication bias, selective reporting within studies).                                                             | 8                                 |
| Additional analyses                                                                                                                        | 16 | Describe methods of additional analyses (e.g., sensitivity or subgroup analyses, meta-regression), if done, indicating which were pre-specified.                                                         | 8                                 |
| <b>RESULTS</b>                                                                                                                             |    |                                                                                                                                                                                                          |                                   |
| Study selection                                                                                                                            | 17 | Give numbers of studies screened, assessed for eligibility, and included in the review, with reasons for exclusions at each stage, ideally with a flow diagram.                                          | 9,25                              |
| Study characteristics                                                                                                                      | 18 | For each study, present characteristics for which data were extracted (e.g., study size, PICOS, follow-up period) and provide the citations.                                                             | 9-10, 15-16                       |
| Risk of bias within studies                                                                                                                | 19 | Present data on risk of bias of each study and, if available, any outcome level assessment (see item 12).                                                                                                | 15, 17, 41, 44                    |
| Results of individual studies                                                                                                              | 20 | For all outcomes considered (benefits or harms), present, for each study: (a) simple summary data for each intervention group (b) effect estimates and confidence intervals, ideally with a forest plot. | 30-31, 39-40, 42-43               |
| Synthesis of results                                                                                                                       | 21 | Present results of each meta-analysis done, including confidence intervals and measures of consistency.                                                                                                  | 11-13, 16-17, 30-31, 39-40, 44-43 |
| Risk of bias across studies                                                                                                                | 22 | Present results of any assessment of risk of bias across studies (see Item 15).                                                                                                                          | 15, 17                            |
| Additional analysis                                                                                                                        | 23 | Give results of additional analyses, if done (e.g., sensitivity or subgroup analyses, meta-regression [see Item 16]).                                                                                    | 11-12, 29, 32-39                  |
| <b>DISCUSSION</b>                                                                                                                          |    |                                                                                                                                                                                                          |                                   |
| Summary of evidence                                                                                                                        | 24 | Summarize the main findings including the strength of evidence for each main outcome; consider their relevance to key groups (e.g., healthcare providers, users, and policy makers).                     | 17, 18                            |
| Limitations                                                                                                                                | 25 | Discuss limitations at study and outcome level (e.g., risk of bias), and at review-level (e.g., incomplete retrieval of identified research, reporting bias).                                            | 19                                |
| Conclusions                                                                                                                                | 26 | Provide a general interpretation of the results in the context of other evidence, and implications for future research.                                                                                  | 19                                |
| <b>FUNDING</b>                                                                                                                             |    |                                                                                                                                                                                                          |                                   |
| For peer review only - <a href="http://bmjopen.bmj.com/site/about/guidelines.xhtml">http://bmjopen.bmj.com/site/about/guidelines.xhtml</a> |    |                                                                                                                                                                                                          |                                   |

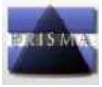

# PRISMA 2009 Checklist

|         |    |                                                                                                                                            |    |
|---------|----|--------------------------------------------------------------------------------------------------------------------------------------------|----|
| Funding | 27 | Describe sources of funding for the systematic review and other support (e.g., supply of data); role of funders for the systematic review. | 19 |
|---------|----|--------------------------------------------------------------------------------------------------------------------------------------------|----|

From: Moher D, Liberati A, Tetzlaff J, Altman DG, The PRISMA Group (2009). Preferred Reporting Items for Systematic Reviews and Meta-Analyses: The PRISMA Statement. PLoS Med 6(7): e1000097. doi:10.1371/journal.pmed1000097

For more information, visit: [www.prisma-statement.org](http://www.prisma-statement.org).

Page 2 of 2

For peer review only

## Appendix 1: Search strategies

**Update of effects and complications of knee arthroscopy****MEDLINE (Pubmed)**

1. (((("Menisci, Tibial/surgery"[MeSH Major Topic]) OR ("Menisci, Tibial/injuries"[MeSH Major Topic]) OR ("Degenerative meniscal tear"[Title/Abstract]) OR ("Arthroscopic lavage"[Title/Abstract]) OR ("Arthroscopic debridement"[Title/Abstract]) OR ("arthroscopic meniscectomy"[Title/Abstract]) OR ((arthroscopy[Title/Abstract] AND knee[Title/Abstract])))
2. (("Randomized"[Title/Abstract]) OR ("Randomized controlled trial"[Publication Type]) OR ("randomized controlled trials as topic"[MeSH Major Topic]) OR ("Random allocation"[MeSH Major Topic]) OR ("Control group"[Title/Abstract]) OR ("Control groups"[MeSH Terms]) OR ("Cross-over studies"[Title/Abstract]) OR ("Cross-over study"[Title/Abstract]))
3. (((("Menisci, Tibial/surgery"[MeSH Major Topic]) OR ("Menisci, Tibial/injuries"[MeSH Major Topic]) OR ("Degenerative meniscal tear"[Title/Abstract]) OR ("Arthroscopic lavage"[Title/Abstract]) OR ("Arthroscopic debridement"[Title/Abstract]) OR ("arthroscopic meniscectomy"[Title/Abstract]) OR ((arthroscopy[Title/Abstract] AND knee[Title/Abstract])))
4. (("adverse events"[Title/Abstract]) OR ("side effects"[Title/Abstract]) OR ("adverse effects"[Title/Abstract]) OR (complication\*[Title/Abstract]) OR ("adverse effects"[MeSH Subheading])))
5. 1 AND 2
6. 3 AND 4
7. 5 OR 6

**EMBASE (Ovid)**

1. Arthroscopic meniscectomy.ti,ab,kw.
2. Arthroscopic debridement.ti,ab,kw.
3. Arthroscopic lavage.ti,ab,kw.
4. Degenerative meniscal tear.ti,ab,kw.
5. knee meniscus/ or meniscus tibial.mp.
6. exp knee arthroscopy/
7. 1 or 2 or 3 or 4 or 5 or 6
8. randomized controlled trial/
9. randomized.ti,ab,kw.
10. randomised.ti,ab,kw.
11. Random allocation.mp.



12. randomised.mp.
13. "randomized controlled trial (topic)"/
14. Control group.mp.
15. control group/
16. crossover procedure/
17. 8 or 9 or 10 or 11 or 12 or 13 or 14 or 15 or 16
18. adverse events.mp.
19. side effects.mp.
20. adverse effects.mp.
21. complications.mp.
22. 18 or 19 or 20 or 21
23. 7 and 17
24. 7 and 22
25. 23 or 24
26. limit 25 to yr="2014-2016"

### **Cochrane Central Register of Controlled Trials**

- #1 MeSH descriptor: [Menisci, Tibial] explode all trees and with qualifier(s): [Injuries - IN, Surgery - SU]
- #2 MeSH descriptor: [Arthroscopy] explode all trees
- #3 MeSH descriptor: [Knee] explode all trees
- #4 #2 and #3
- #5 Degenerative meniscal tear:ti,ab,kw (Word variations have been searched)
- #6 Arthroscopic lavage:ti,ab,kw (Word variations have been searched)
- #7 Arthroscopic debridement:ti,ab,kw (Word variations have been searched)
- #8 arthroscopic meniscectomy:ti,ab,kw (Word variations have been searched)
- #9 #1 or #4 or #5 or #6 or #7 or #8 Publication Year from 2014 to 2016, in Trials

### **New search of outcome nerve damage**

#### **Medline Pubmed**

1  
2  
3 ("Peripheral Nerve Injuries"[Mesh]) AND ("Arthroplasty, Replacement, Knee/adverse effects"[Mesh] OR  
4 "knee arthroscopy" OR ("arthroscop\*" AND "knee"))  
5  
6

7  
8 **Embase (Ovid)**  
9

- 10 1. exp nerve injury/  
11 2. exp knee arthroscopy/  
12 3. 1 AND 2  
13  
14  
15  
16  
17  
18  
19  
20  
21  
22  
23  
24  
25  
26  
27  
28  
29  
30  
31  
32  
33  
34  
35  
36  
37  
38  
39  
40  
41  
42  
43  
44  
45  
46  
47  
48  
49  
50  
51  
52  
53  
54  
55  
56  
57  
58  
59  
60

For peer review only

Appendix 2: Results of sensitivity analyses to assess the robustness of the difference in the proportion of patients who reach a change higher than the MID

| Outcome                    | MID (range)                                   | Risk difference (95% CI) | Risk difference when using lowest value of the range (95% CI) | Risk difference when using highest value of the range (95% CI) | Risk difference based on the standardized mean difference* (95% CI) |
|----------------------------|-----------------------------------------------|--------------------------|---------------------------------------------------------------|----------------------------------------------------------------|---------------------------------------------------------------------|
| Pain in the short term     | KOOS pain <sup>58</sup><br>12 (4; 20)         | 12.4%<br>(4.4; 20.4)     | 10.5%<br>(4.3; 16.7)                                          | 11.3%<br>(2.9; 19.7)                                           | 9%<br>(1.7; 15.7)                                                   |
|                            | WOMAC pain <sup>61</sup><br>12 (2; 30)        |                          |                                                               |                                                                |                                                                     |
| Function in the short term | KOOS ADL <sup>58</sup><br>8 (3; 9)            | 13.4%<br>(4.4; 22.3)     | 11.3%<br>(3; 19.5)                                            | 11%<br>(2; 19.9)                                               | 7.3%<br>(-0.06; 15.1)                                               |
|                            | WOMAC function <sup>61 62</sup><br>13 (3; 34) |                          |                                                               |                                                                |                                                                     |

\*This method relies on the standardized mean difference. It does not use any specific threshold to calculate the risk difference.

Appendix Figure 1: Meta-analysis of pain in the short-term (difference in change from baseline)

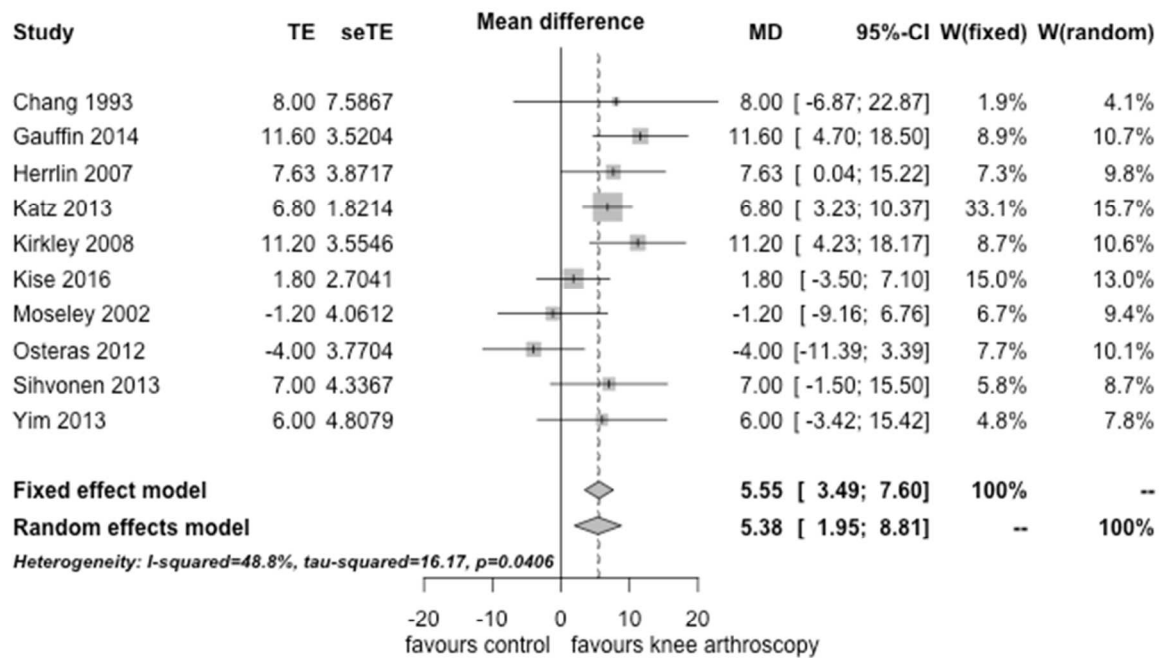

Appendix Figure 2: Meta-analysis of pain in the long-term (difference in change from baseline)

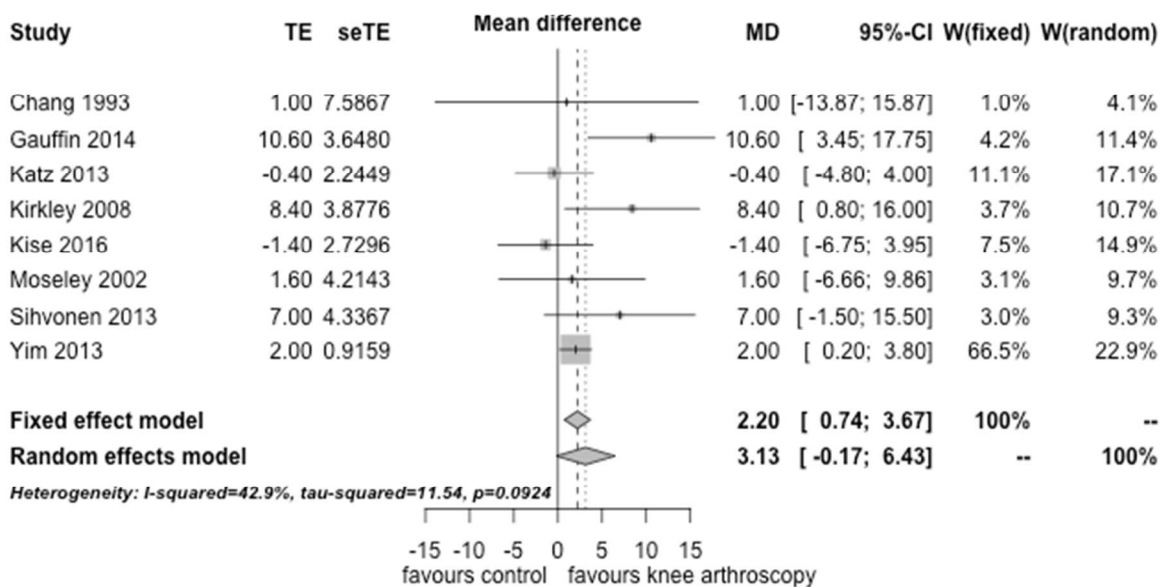

Appendix Figure 3: Meta-analysis of function in the short-term (difference in change from baseline)

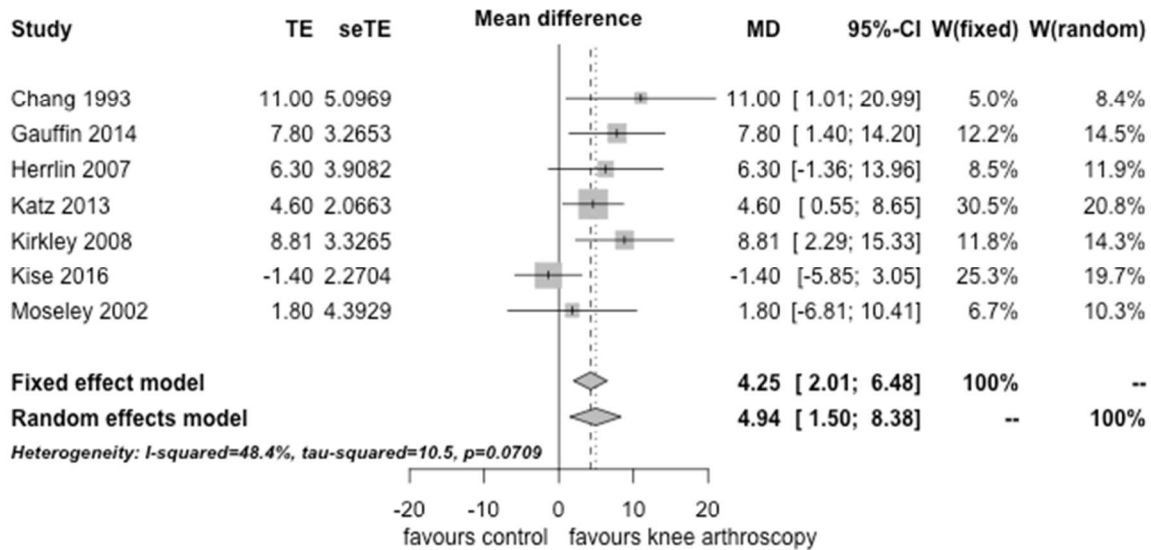

Appendix Figure 4: Meta-analysis of function in the long-term (difference in change from baseline)

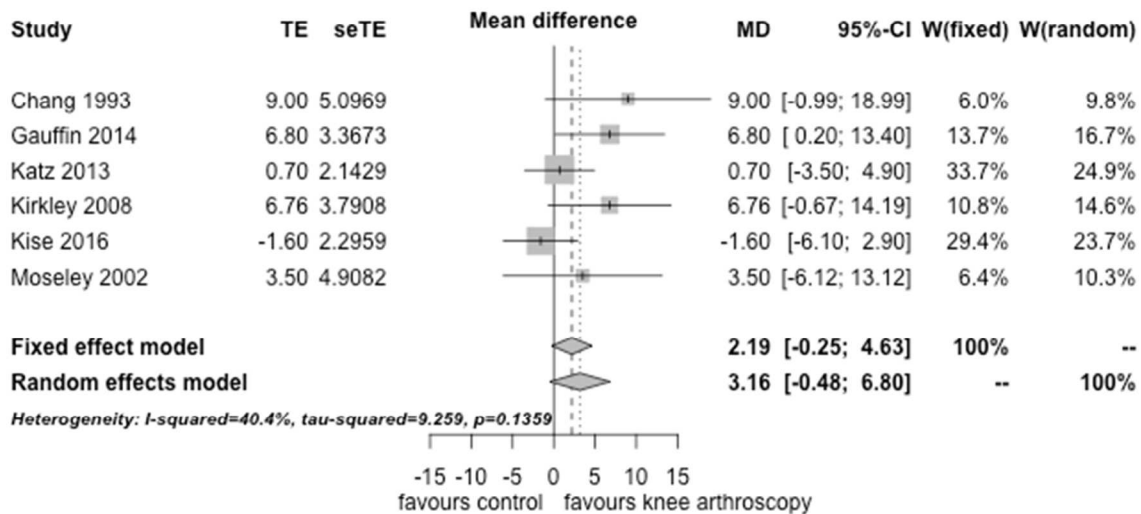

Appendix Figure 5: Subgroup analysis of pain in the short term (difference on change from baseline) according to blinding of the studies. P value of test for subgroup effect= 0.48

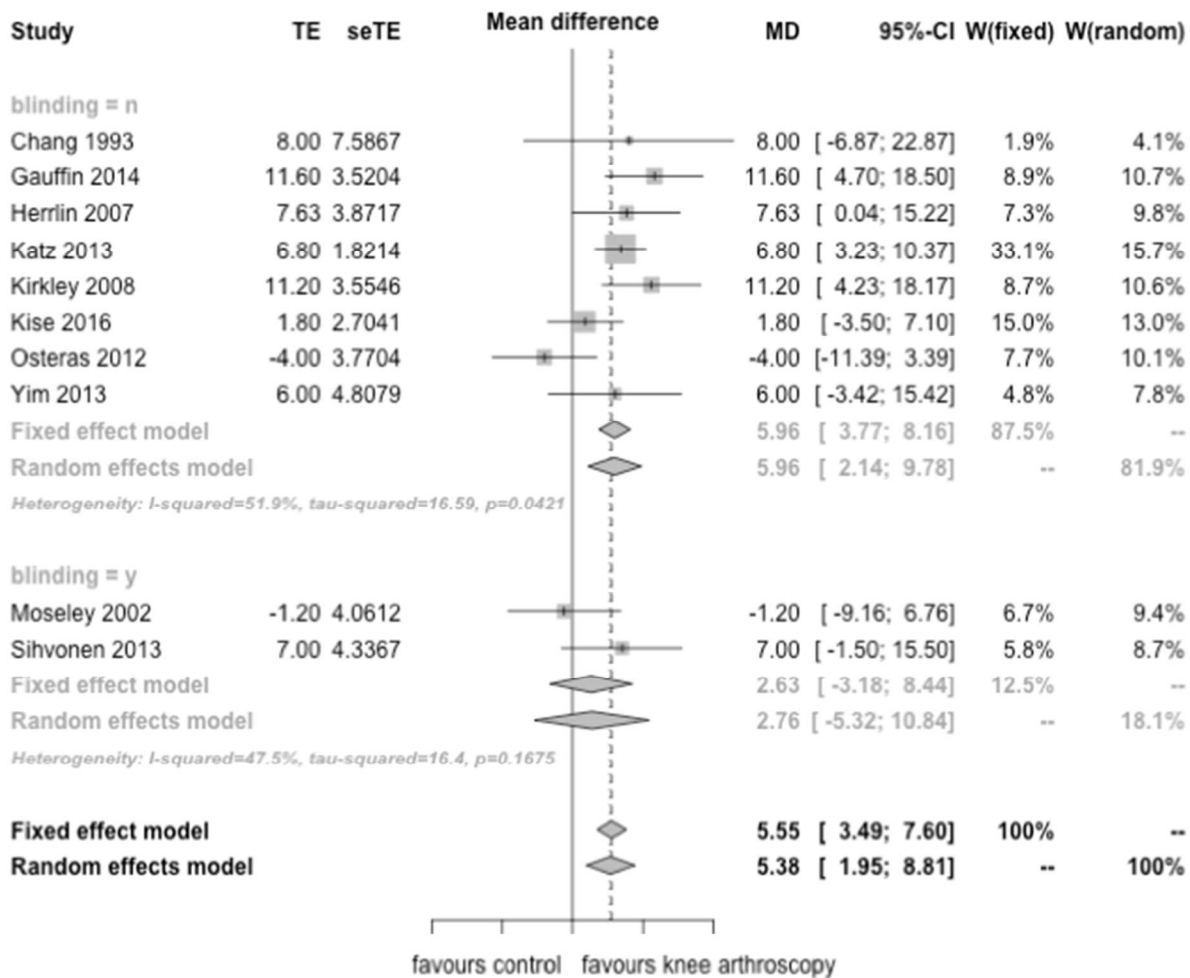

only

Appendix Figure 6: Subgroup analysis of pain in the short term (difference on change from baseline) according to percentage of patients with radiographic knee osteoarthritis (>50% patients). P value of test for subgroup effect= 0.88

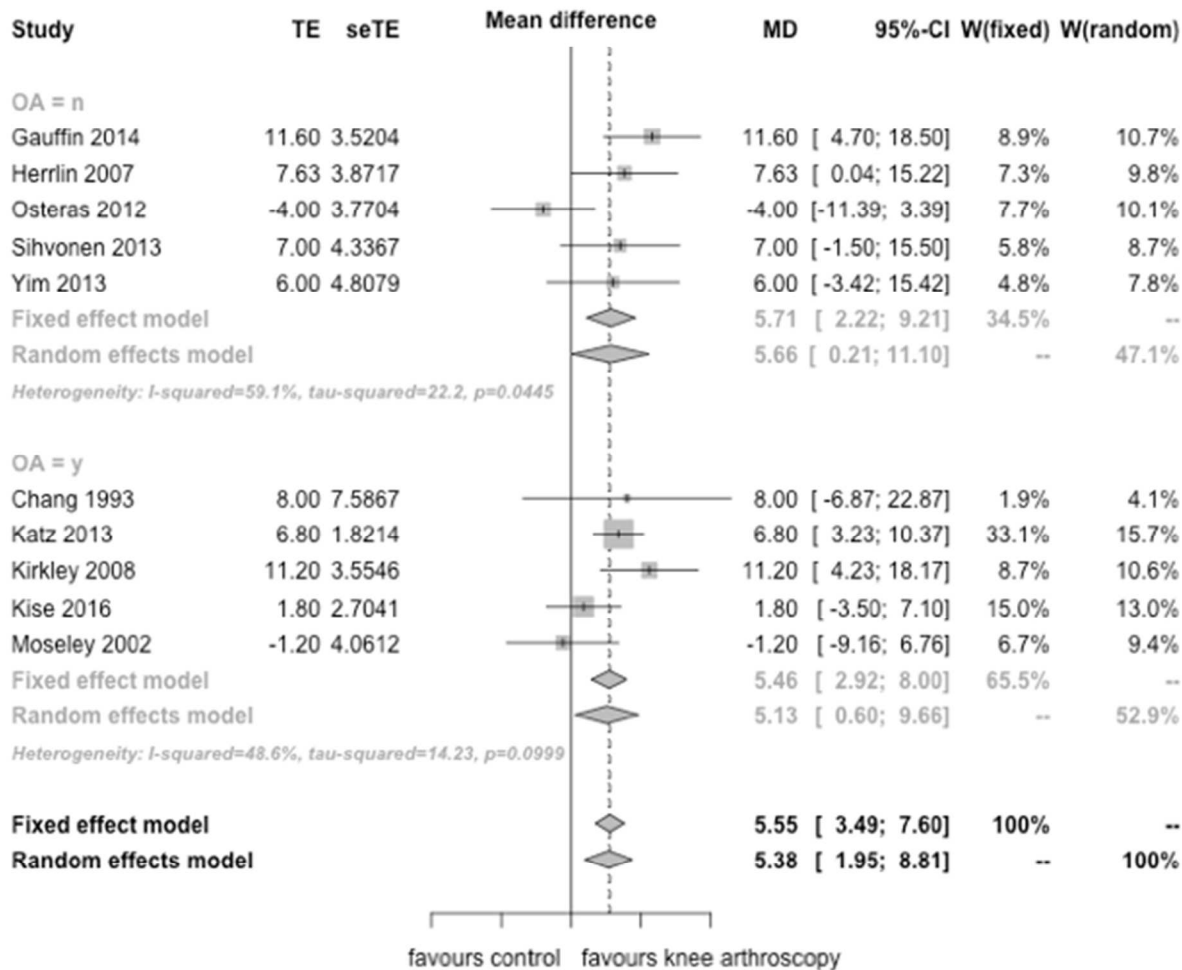

Appendix Figure 7: Subgroup analysis of pain in the long term (difference on change from baseline) according to blinding of the studies. P value of test for subgroup effect= 0.75

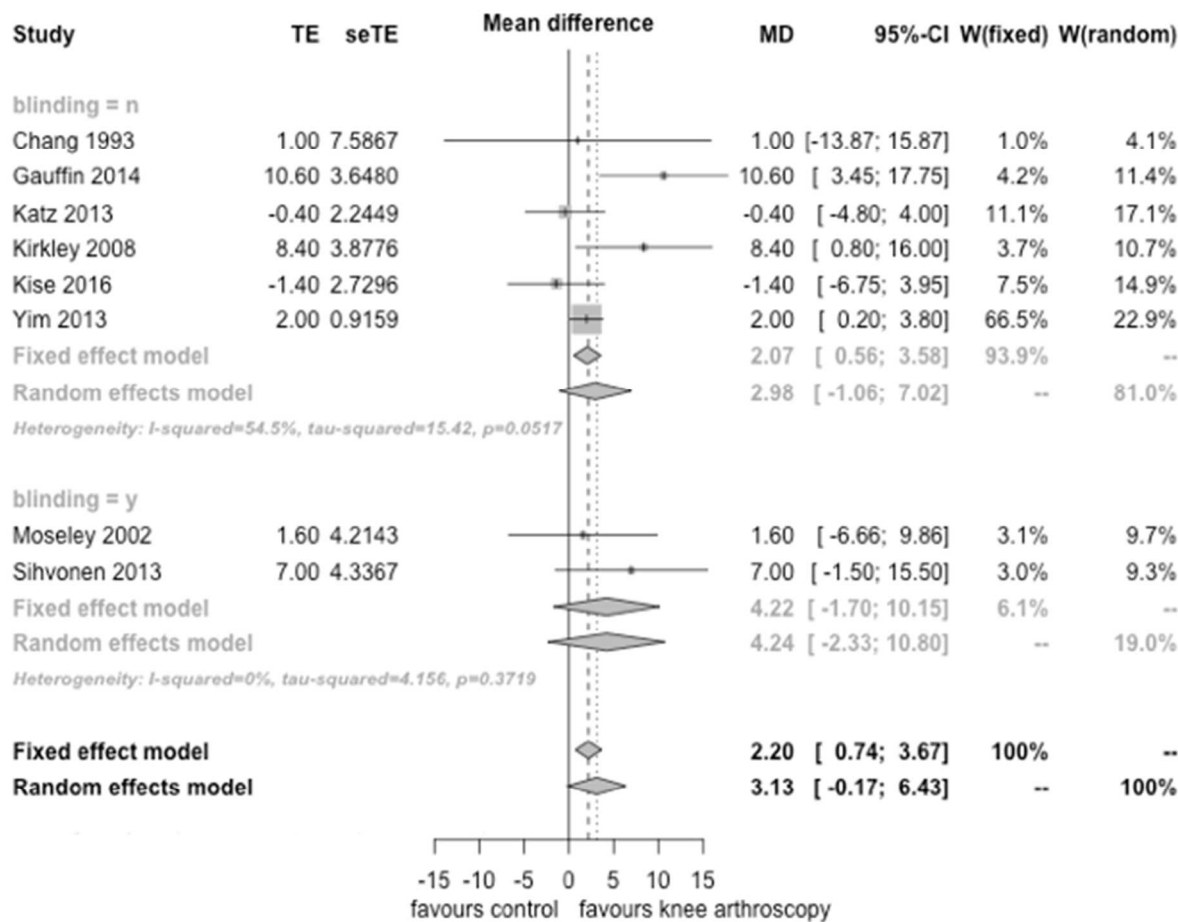



Appendix Figure 8: Subgroup analysis of pain in the long term (difference on change from baseline) according to percentage of patients with radiographic knee osteoarthritis (>50% patients). P value of test for subgroup effect= 0.22

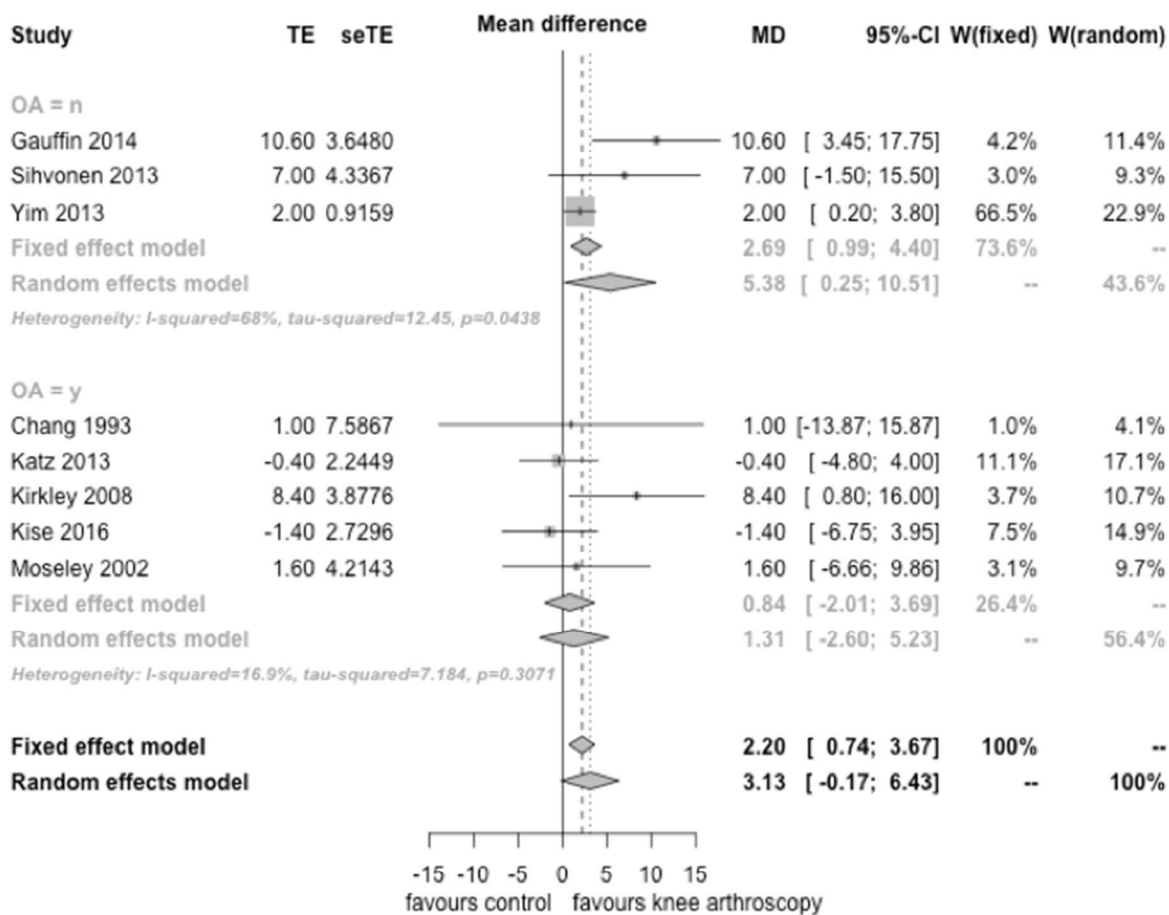

Only

Appendix Figure 9: Subgroup analysis of function in the short term (difference on change from baseline) according to blinding of the studies. P value of test for subgroup effect= 0.46

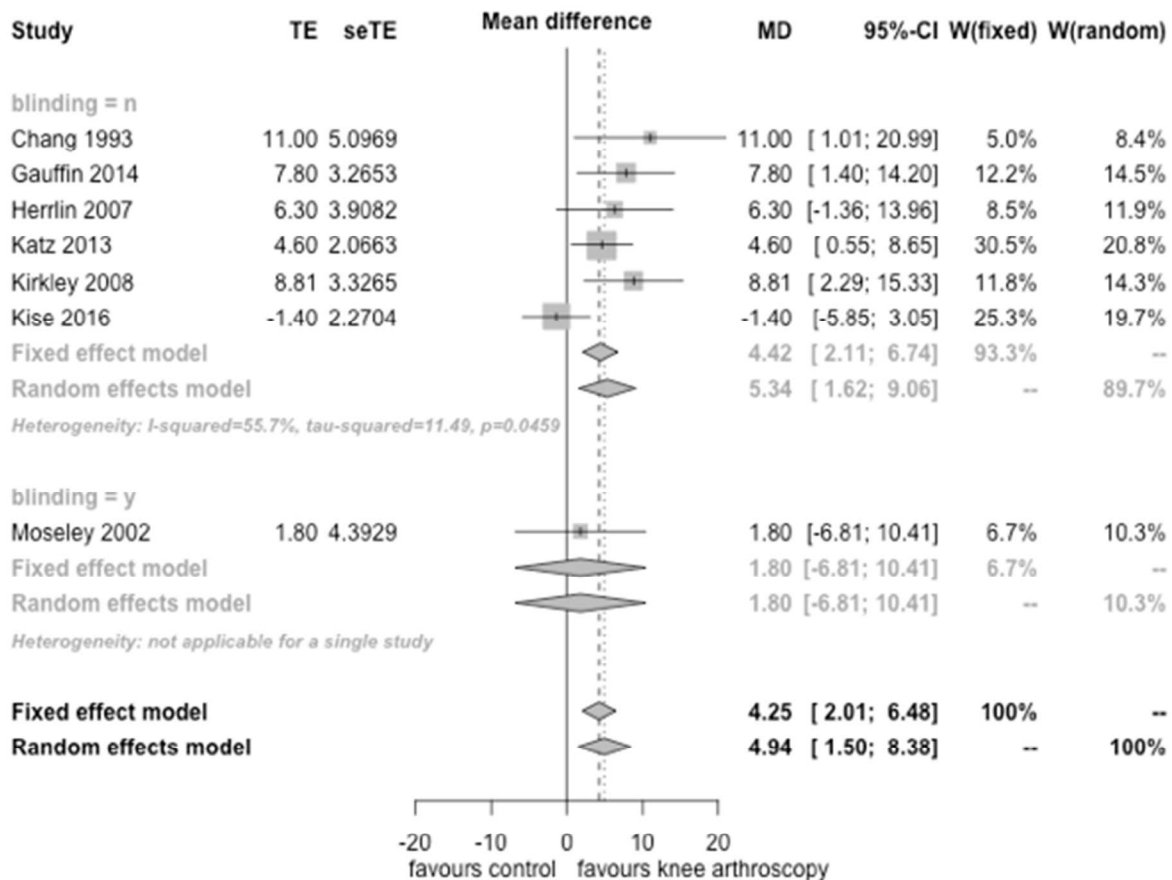

w only

Appendix Figure 10: Subgroup analysis of function in the short term (difference on change from baseline) according to percentage of patients with radiographic knee osteoarthritis (>50% patients). P value of test for subgroup effect= 0.40

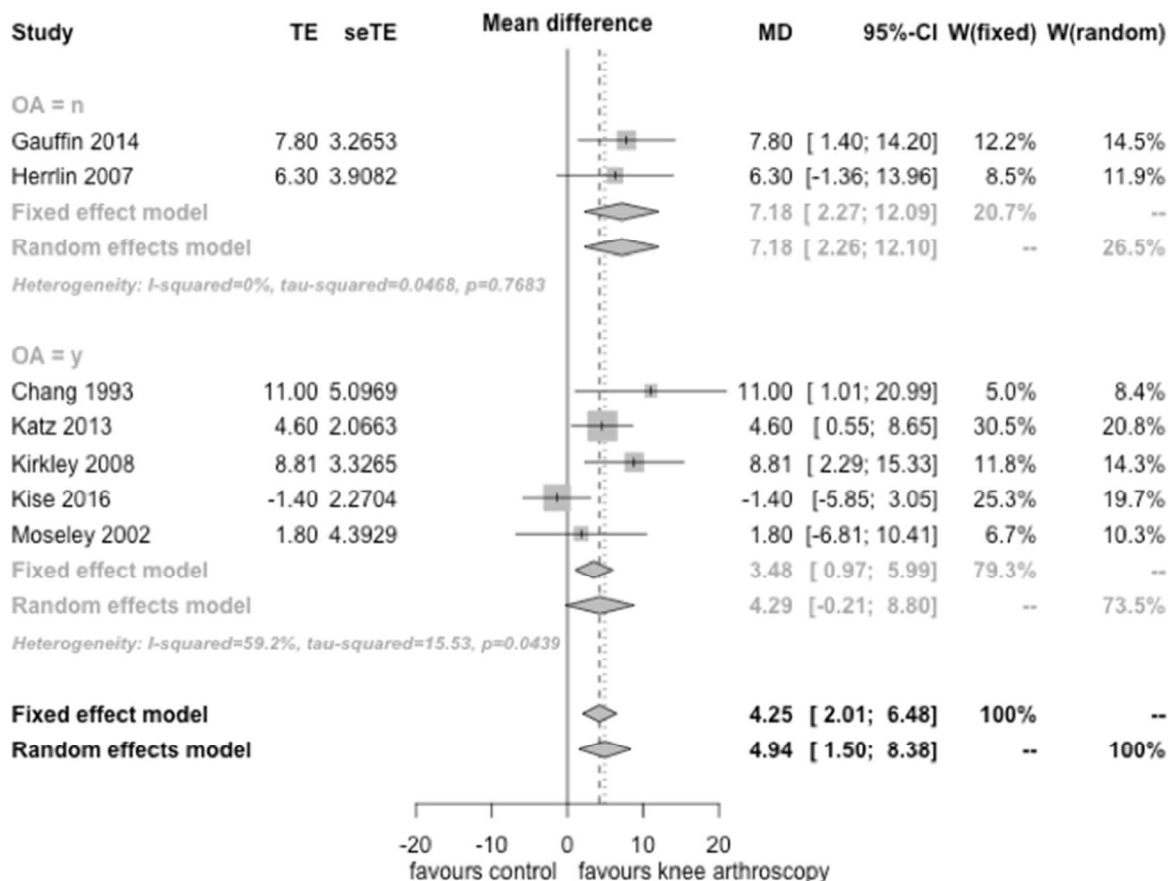

For peer review only

Appendix Figure 11: Subgroup analysis of function in the long term (difference on change from baseline) according to blinding of the studies. P value of test for subgroup effect= 0.97

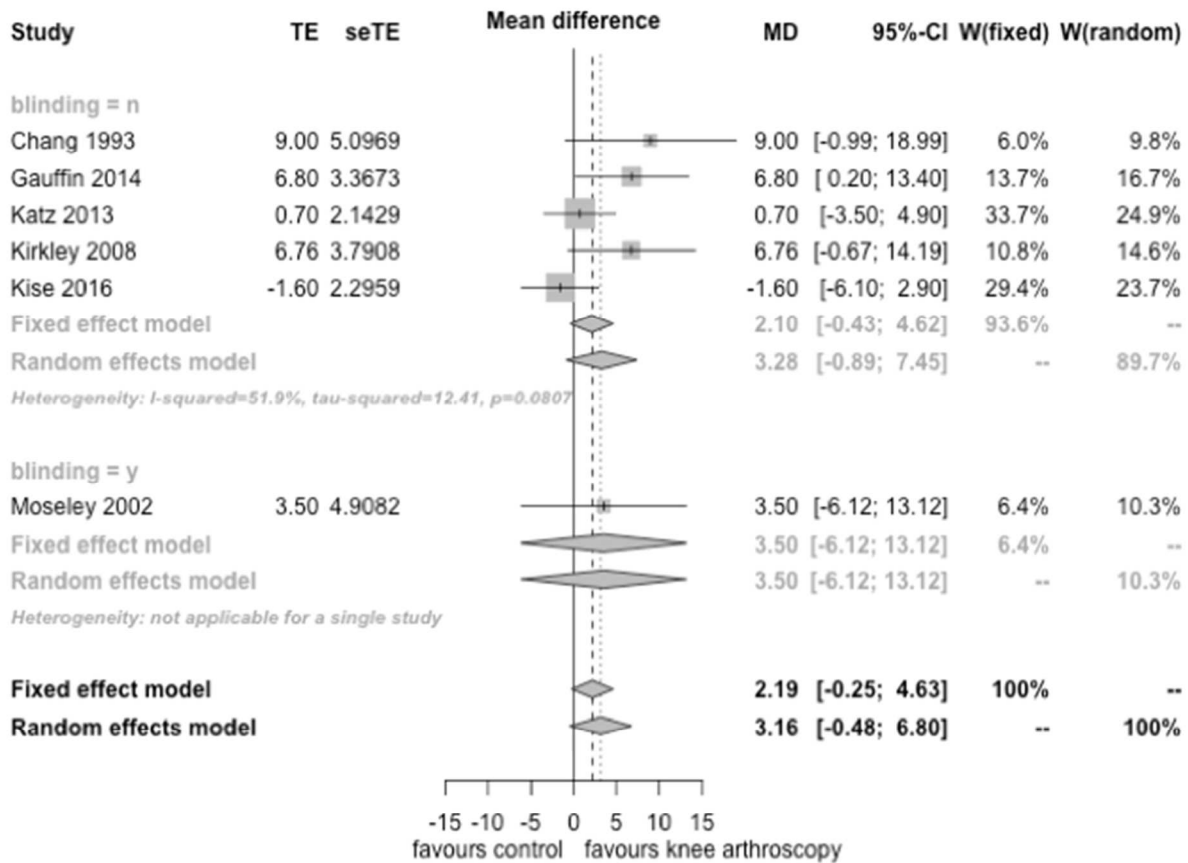

View Only

Appendix Figure 12: Subgroup analysis of function in the long term (difference on change from baseline) according to percentage of patients with radiographic knee osteoarthritis (>50% patients). P value of test for subgroup effect= 0.27

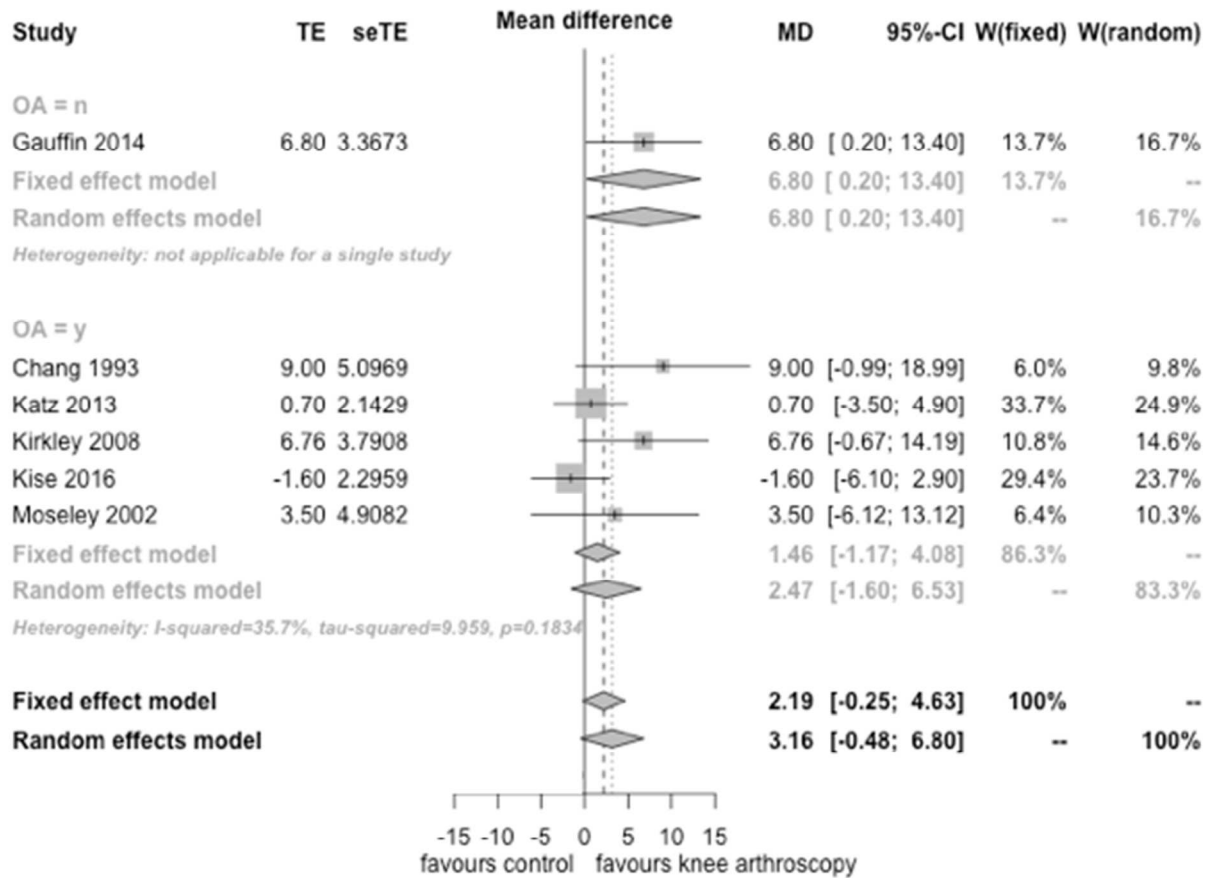

Appendix Figure 13: Meta-analysis of Quality of life in the long-term (difference in change from baseline)

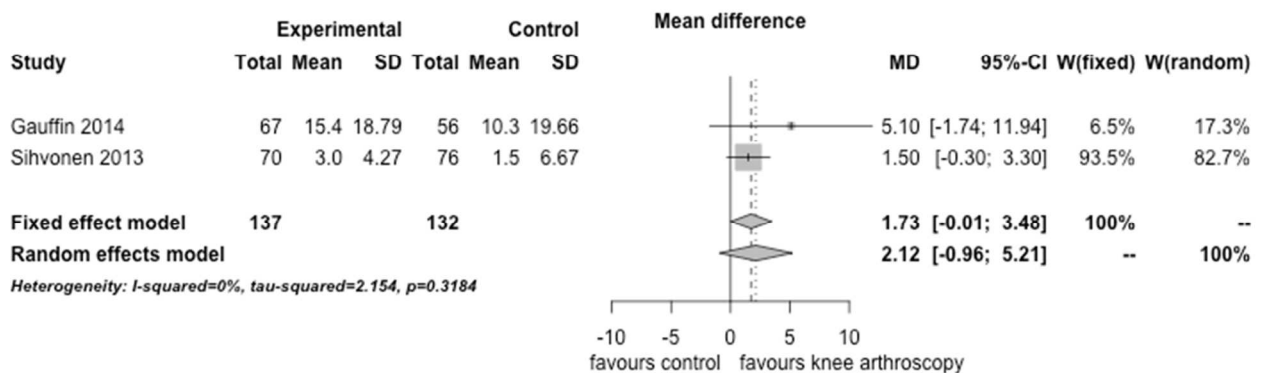

Appendix Figure 14: Meta-analysis of Knee Replacement

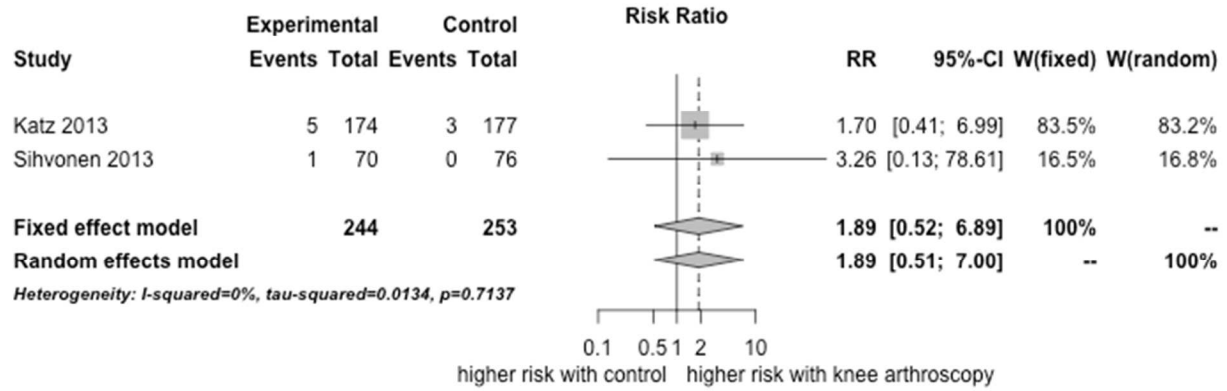

peer review only

Appendix Figure 15: Risk of bias of studies included in the systematic review of effects of knee arthroscopy

|                    | Random sequence generation (selection bias) | Allocation concealment (selection bias) | Blinding of participants (performance and detection bias) | Incomplete outcome data (attrition bias) | Selective reporting (reporting bias) | Other bias |
|--------------------|---------------------------------------------|-----------------------------------------|-----------------------------------------------------------|------------------------------------------|--------------------------------------|------------|
| Chang 1993         | +                                           | -                                       | -                                                         | +                                        | +                                    | +          |
| Gauffin 2014       | +                                           | +                                       | -                                                         | -                                        | +                                    | +          |
| Herrlin 2007, 2013 | +                                           | -                                       | -                                                         | -                                        | +                                    | -          |
| Katz 2013          | +                                           | +                                       | -                                                         | +                                        | +                                    | +          |
| Kirkley 2008       | +                                           | +                                       | -                                                         | -                                        | +                                    | +          |
| Kise 2016          | +                                           | +                                       | -                                                         | +                                        | +                                    | +          |
| Moseley 2002       | +                                           | +                                       | +                                                         | +                                        | +                                    | +          |
| Osteras 2012       | +                                           | +                                       | -                                                         | +                                        | +                                    | +          |
| Saeed 2015         | +                                           | -                                       | -                                                         | +                                        | -                                    | +          |
| Sihvonen 2013      | +                                           | +                                       | +                                                         | +                                        | +                                    | +          |
| Stensrud 2015      | +                                           | +                                       | -                                                         | -                                        | -                                    | +          |
| Vermesan 2013      | +                                           | -                                       | -                                                         | +                                        | -                                    | +          |
| Yim 2013           | +                                           | +                                       | -                                                         | +                                        | +                                    | +          |

Appendix Figure 16: Funnel plots for publication bias assessments of effects of knee arthroscopy

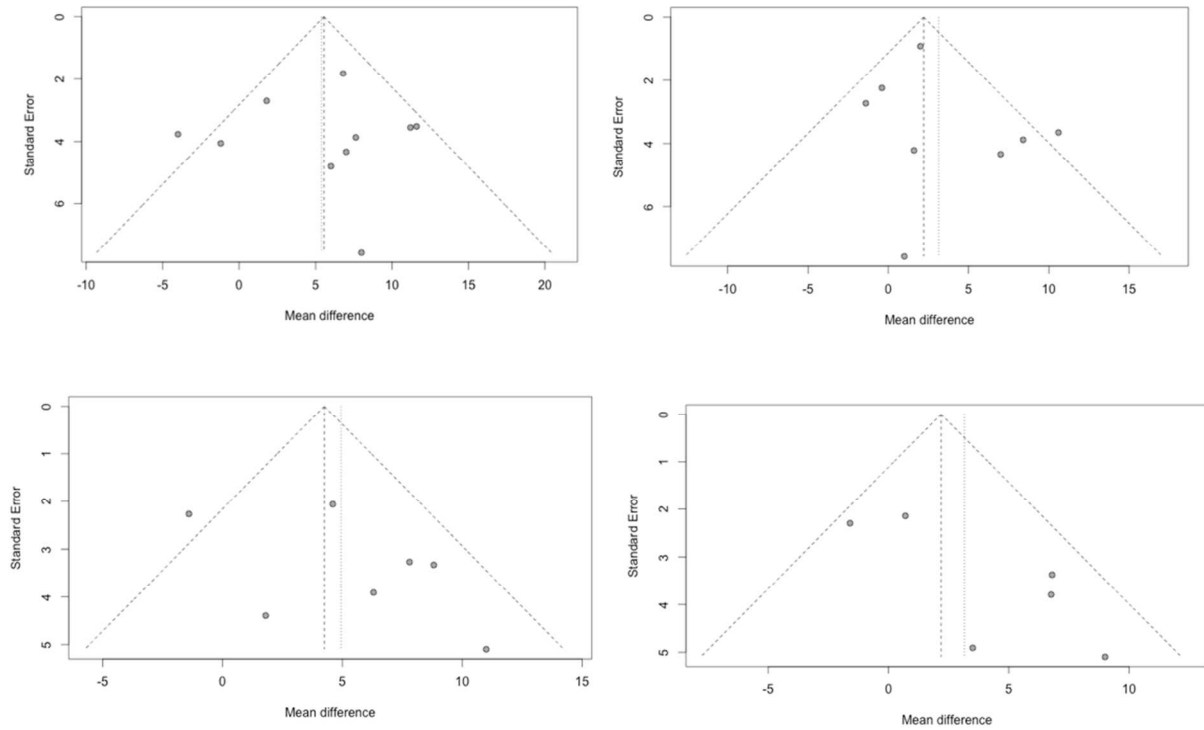

Top left: Short-term pain; Top right: Long-term pain; Bottom left: Short-term function; Bottom right: Long-term function

Appendix Figure 17: Meta-analysis of Mortality

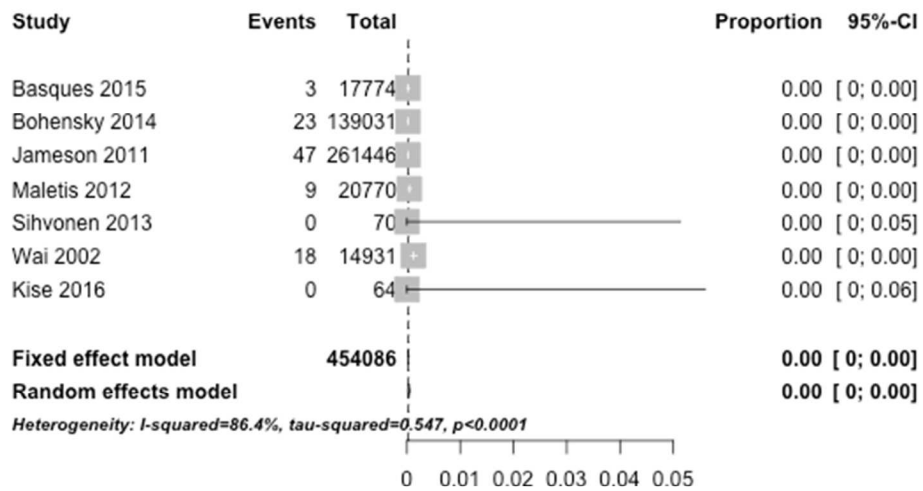



Appendix Figure 18: Meta-analysis of VTE

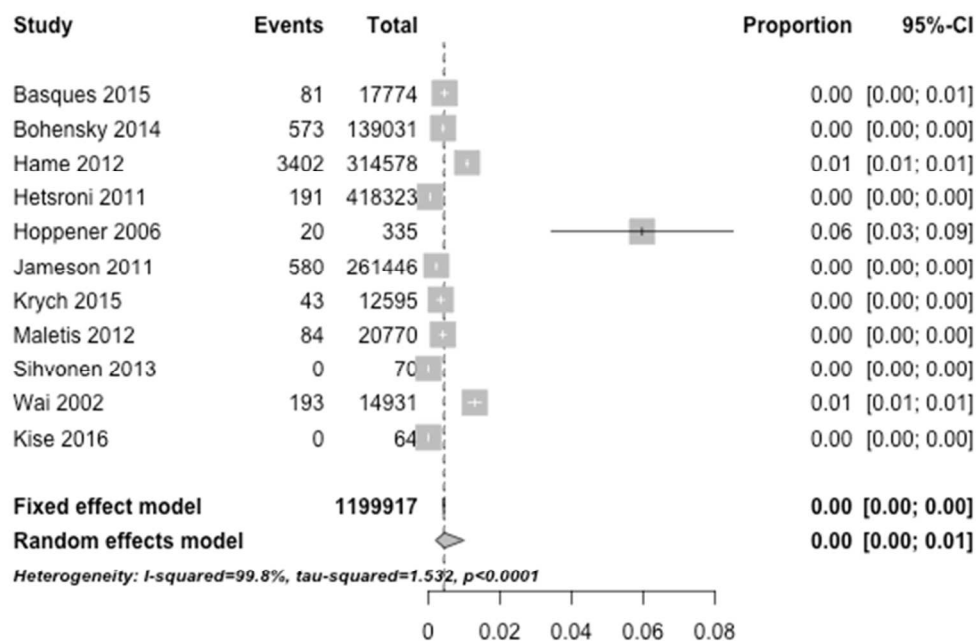

Appendix Figure 19: Meta-analysis of infection

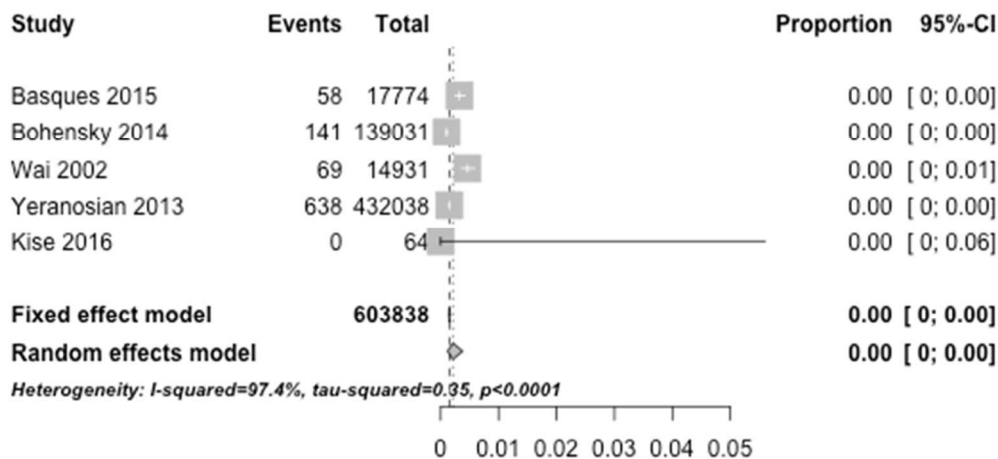

Appendix Figure 20: Risk of bias of the studies included in the systematic review of complications of knee arthroscopy

|                 | Inclusion of consecutive patients | Prospective collection of data | Unbiased assessment of outcomes | Appropriate length of follow-up | Incomplete outcome data (attrition bias) | Prospective calculation of sample size |
|-----------------|-----------------------------------|--------------------------------|---------------------------------|---------------------------------|------------------------------------------|----------------------------------------|
| Basques 2015    | +                                 | -                              | +                               | +                               | +                                        | +                                      |
| Bohensky 2014   | +                                 | -                              | +                               | +                               | +                                        | +                                      |
| Cancienne 2016  | +                                 | -                              | +                               | +                               | +                                        | +                                      |
| Hame 2012       | +                                 | -                              | +                               | +                               | +                                        | +                                      |
| Hetsroni 2011   | +                                 | -                              | +                               | +                               | +                                        | +                                      |
| Hoppener 2006   | +                                 | +                              | +                               | +                               | +                                        | -                                      |
| Jameson 2011    | +                                 | -                              | +                               | +                               | +                                        | +                                      |
| Katz 2013       | -                                 | -                              | +                               | +                               | +                                        | -                                      |
| Kise 2016       | -                                 | +                              | +                               | +                               | +                                        | -                                      |
| Krych 2015      | -                                 | -                              | +                               | +                               | -                                        | +                                      |
| Maletis 2012    | +                                 | -                              | +                               | +                               | +                                        | +                                      |
| Sihvonen 2013   | -                                 | +                              | +                               | +                               | +                                        | -                                      |
| Wai 2002        | +                                 | -                              | +                               | +                               | +                                        | +                                      |
| Yacub 2009      | +                                 | -                              | +                               | +                               | +                                        | +                                      |
| Yeranosian 2013 | -                                 | +                              | +                               | +                               | +                                        | -                                      |

Appendix Figure 21: Funnel plots for publication bias assessment of complications of knee arthroscopy

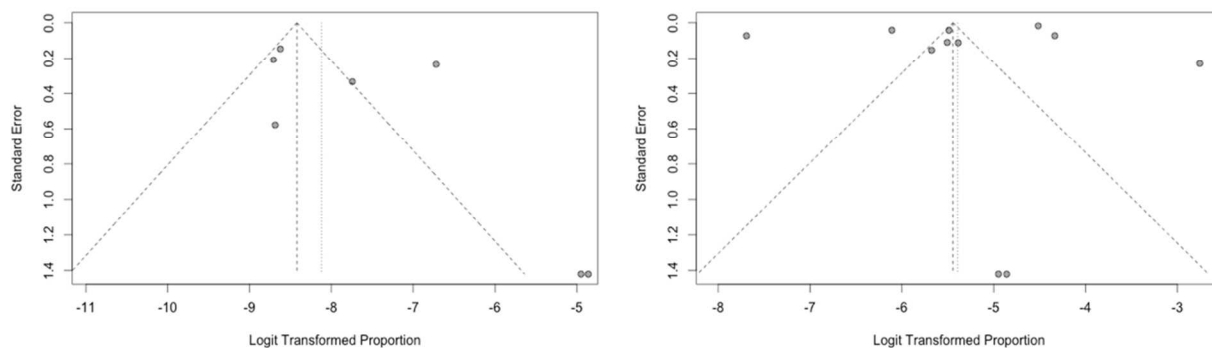

Left: Mortality; Right: VTE. Outliers represent the findings of two randomized clinical trials with small sample sizes and 0 events observed.

peer review only

1  
2  
3  
4  
5  
6  
7  
8  
9  
10  
11  
12  
13  
14  
15  
16  
17  
18  
19  
20  
21  
22  
23  
24  
25  
26  
27  
28  
29  
30  
31  
32  
33  
34  
35  
36  
37  
38  
39  
40  
41  
42  
43  
44  
45  
46  
47  
48  
49  
50  
51  
52  
53  
54  
55  
56  
57  
58  
59  
60

# BMJ Open

## Knee arthroscopy versus conservative management in patients with degenerative knee disease: a systematic review

|                                 |                                                                                                                                                                                                                                                                                                                                                                                                                                                                                                                                                                                                                                                                                                                                                                                                                                                                                                                       |
|---------------------------------|-----------------------------------------------------------------------------------------------------------------------------------------------------------------------------------------------------------------------------------------------------------------------------------------------------------------------------------------------------------------------------------------------------------------------------------------------------------------------------------------------------------------------------------------------------------------------------------------------------------------------------------------------------------------------------------------------------------------------------------------------------------------------------------------------------------------------------------------------------------------------------------------------------------------------|
| Journal:                        | <i>BMJ Open</i>                                                                                                                                                                                                                                                                                                                                                                                                                                                                                                                                                                                                                                                                                                                                                                                                                                                                                                       |
| Manuscript ID                   | bmjopen-2017-016114.R1                                                                                                                                                                                                                                                                                                                                                                                                                                                                                                                                                                                                                                                                                                                                                                                                                                                                                                |
| Article Type:                   | Research                                                                                                                                                                                                                                                                                                                                                                                                                                                                                                                                                                                                                                                                                                                                                                                                                                                                                                              |
| Date Submitted by the Author:   | 07-Feb-2017                                                                                                                                                                                                                                                                                                                                                                                                                                                                                                                                                                                                                                                                                                                                                                                                                                                                                                           |
| Complete List of Authors:       | Brignardello-Petersen, Romina; University of Toronto, Clinical Epidemiology and Health Care Research<br>Siemieniuk, Reed; McMaster University, Clinical Epidemiology & Biostatistics; University of Toronto, Medicine<br>Guyatt, Gordon; McMaster University,<br>Buchbinder, Rachele; Cabrini Hospital, Monash Department of Clinical Epidemiology<br>Poolman, Rudolf; Onze Lieve Vrouwe Gasthuis, Orthopaedic Surgery<br>Schandelmaier, Stefan; McMaster University Department of Clinical Epidemiology and Biostatistics<br>Chang, Yaping; McMaster University, Department of Clinical Epidemiology and Biostatistics<br>Sadeghirad, Behnam ; Kerman University of Medical Sciences, Research Center for Modeling in Health, Institute for Futures Studies in Health<br>Evaniew, Nathan; McMaster University, Orthopaedic Surgery<br>Vandvik, Per; Innlandet Hospital Trust-divisjon Gjøvik, Department of Medicine |
| <b>Primary Subject Heading</b>: | Rheumatology                                                                                                                                                                                                                                                                                                                                                                                                                                                                                                                                                                                                                                                                                                                                                                                                                                                                                                          |
| Secondary Subject Heading:      | Evidence based practice, General practice / Family practice, Surgery, Sports and exercise medicine                                                                                                                                                                                                                                                                                                                                                                                                                                                                                                                                                                                                                                                                                                                                                                                                                    |
| Keywords:                       | Knee < ORTHOPAEDIC & TRAUMA SURGERY, arthritis, Osteoarthritis, knee pain, meniscus tear, GRADE                                                                                                                                                                                                                                                                                                                                                                                                                                                                                                                                                                                                                                                                                                                                                                                                                       |
|                                 |                                                                                                                                                                                                                                                                                                                                                                                                                                                                                                                                                                                                                                                                                                                                                                                                                                                                                                                       |

SCHOLARONE™  
Manuscripts

1  
2  
3  
4  
5  
6  
7  
8  
9  
10  
11  
12  
13  
14  
15  
16  
17  
18  
19  
20  
21  
22  
23  
24  
25  
26  
27  
28  
29  
30  
31  
32  
33  
34  
35  
36  
37  
38  
39  
40  
41  
42  
43  
44  
45  
46  
47  
48  
49  
50  
51  
52  
53  
54  
55  
56  
57  
58  
59  
60

## KNEE ARTHROSCOPY VERSUS CONSERVATIVE MANAGEMENT IN PATIENTS WITH DEGENERATIVE KNEE DISEASE: A SYSTEMATIC REVIEW

Romina Brignardello-Petersen, *Postdoctoral Fellow*,<sup>1,2</sup> Gordon H. Guyatt, *Distinguished Professor*,<sup>1</sup>  
Rachelle Buchbinder, *Professor and rheumatologist*,<sup>3,4</sup> Rudolf W. Poolman, *Consultant Orthopaedic  
Surgeon*,<sup>5</sup> Stefan Schandelmaier, *PhD Student*,<sup>1,5=6</sup> Yaping Chang, *PhD Student*,<sup>1</sup> Behnam Sadeghirad,  
*PhD Student*,<sup>1,7</sup> Nathan Evaniew, *Resident*,<sup>8</sup> Per O. Vandvik, *Associate Professor*.<sup>9,10</sup>

<sup>1</sup> Department of Health Research Methods, Evidence, and Impact, McMaster University, 1280 Main St  
West, Hamilton, Ontario, L8S 4L8, Canada

<sup>2</sup> Evidence-Based Dentistry Unit, Faculty of Dentistry, Universidad de Chile, Sergio Livingstone 943,  
Independencia, Santiago, Chile

<sup>3</sup> Department of Epidemiology and Preventive Medicine, School of Public Health & Preventive  
Medicine, Monash University, Melbourne, Vic 3004, Australia

<sup>4</sup> Monash Department of Clinical Epidemiology, Cabrini Institute, Suite 41 Cabrini Medical Centre, 183  
Wattletree Road, Malvern, Vic 3144, Australia

<sup>5</sup> Department of Orthopedic Surgery and Traumatology, Joint Research, OLVG, Postbus 95500, 1090  
HM, Amsterdam, The Netherlands

<sup>6</sup> Institute for Clinical Epidemiology and Biostatistics, University Hospital Basel, Spitalstrasse 12, 1<sup>st</sup>  
floor, CH-4031, Basel, Switzerland

<sup>7</sup> HIV/STI Surveillance Research Center, and WHO Collaborating Center for HIV Surveillance, Institute  
for Futures Studies in Health, Kerman University of Medical Sciences, Medical University Campus, Haft-  
Bagh Highway, 7616913555, Kerman, Iran

<sup>8</sup> Division of Orthopaedics, Department of Surgery, McMaster University, 1280 Main St West, Hamilton,  
Ontario, L8S 4L8, Canada

<sup>9</sup> Department of Medicine, Innlandet Hospital Trust- Division Gjøvik, Kyrre Grepps gate 11, 2819  
Gjøvik, Norway

<sup>10</sup> Institute of Health and Society, Faculty of Medicine, University of Oslo, P.O Box 1130, Blindern 0318,  
Oslo, Norway

### Correspondence to:

Romina Brignardello-Petersen (brignarr@mcmaster.ca)  
Department of Health Research Methods, Evidence, and Impact  
1280 Main Street West, Hamilton, Ontario, L8S 4K1, Canada

## ARTICLE SUMMARY

### ABSTRACT

**Objective:** To determine the effects and complications of arthroscopic surgery compared to conservative management strategies in patients with degenerative knee disease

**Design:** Systematic review

**Main Outcome Measures:** Pain, function, adverse events

**Data sources:** MEDLINE, EMBASE, the Cochrane Central Register of Controlled Trials (CENTRAL), Google Scholar and Open Grey up to August 2016.

**Eligibility criteria:** For effects, randomized clinical trials (RCTs) comparing arthroscopic surgery with a conservative management strategy (including sham surgery) in patients with degenerative knee disease.

For complications, RCTs and observational studies.

**Review methods:** Two reviewers independently extracted data and assessed risk of bias for patient-important outcomes. A parallel guideline committee (*BMJ* Rapid Recommendations) provided input on the design and interpretation of the systematic review, including selection of patient-important outcomes. We used the GRADE approach to rate the certainty (quality) of the evidence.

**Results:** We included 13 RCTs and 12 observational studies. With respect to pain, the review identified high certainty evidence that knee arthroscopy results in a very small reduction in pain up to 3 months (mean difference= 5.4 on a 100-point scale, 95% CI 2.0; 8.8) and very small or no pain reduction up to 2 years (mean difference= 3.1, 95% CI -0.2; 6.4) when compared to conservative management. With respect to function, the review identified moderate certainty evidence that knee arthroscopy results in a very small improvement in the short-term (mean difference= 4.9 on a 100-point scale, 95% CI 1.5; 8.4) and very small or no improved function up to 2 years (3.2, 95% CI -0.5; 6.8). Alternative presentations of magnitude of effect, and associated sensitivity analyses, were consistent with the findings of the primary analysis. Low quality evidence suggested a very low probability of serious complications after knee arthroscopy.

**Conclusion:** Over the long term, patients who undergo knee arthroscopy versus those who receive conservative management strategies do not have important benefits in pain or function.

**Systematic review registration:** PROSPERO CRD42016046242

**STRENGTHS AND LIMITATIONS OF THIS STUDY**

- This is an update of previously published systematic reviews on the topic.
- This review is linked to a BMJ Rapid Recommendations project. We conducted the review directed by a guideline panel that included patient representatives. This guideline panel provided detailed input with regards to the patients, interventions and outcomes, and the interpretation of the results from this review.
- We included 7 new studies, analyzed data focusing on clinical interpretability, and explicitly assessed the certainty in the estimates of effect.
- We performed meta-analyses using different measures of effect, and conducted subgroup and sensitivity analyses that strengthened our conclusions.

### WHAT IS ALREADY KNOWN IN THIS TOPIC:

- Although systematic reviews have failed to establish that knee arthroscopy has clear benefits over conservative management strategies, orthopaedic surgeons often offer this procedure to patients with degenerative knee disease
- Current guideline recommendations on managements of knee pain and associated functional limitation provide conflicting guidance and exclude many patients with degenerative knee disease (eg. those with meniscal tears with or without radiographic evidence of osteoarthritis)

### WHAT THIS STUDY ADDS

- Moderate to high certainty evidence shows that there are at best only very small differences in pain, function, and quality of life of patients who underwent knee arthroscopy compared to those who received conservative management strategies over the short term, and no benefit over the long term.
- Patients can expect, on average, to achieve small but important improvement over the period of two years, irrespective of what treatment they receive.
- Patients and their health care providers must trade off the marginal short-term benefits against the burden and potential complications of the surgical procedure

### INTRODUCTION

As a result of degenerative knee disease (osteoarthritis in the knee which can involve the joint lining and/or menisci), approximately 25% of people over 45 years experience pain and other symptoms that may be severe and negatively impact quality of life.<sup>1 2 3</sup> Total knee arthroplasty is the only definitive therapy available, but is reserved for patients with severe disease who fail conservative management.

In the United States, arthroscopic knee surgery in people with degenerative knee disease is the most common ambulatory orthopaedic procedure, and the ninth most commonly performed ambulatory procedure overall.<sup>4</sup> Such surgery results in transient increase in pain and the necessity for restriction in activities for a period of 2 to 12 weeks.<sup>5 6</sup> Current guidelines recommend against arthroscopic lavage and/or debridement for patients with symptomatic knee osteoarthritis, but do not make specific recommendations for or against partial meniscectomy in those with degenerative meniscal tears (with or without other concomitant degenerative changes).<sup>7 8</sup> Further, many orthopedic surgeons suggest that patients with mechanical symptoms and meniscal tears – typically locking or catching of the knee – may benefit from arthroscopic partial meniscectomy.<sup>9 10</sup>



1  
2  
3 Our systematic review informs the second *BMJ* Rapid Recommendations,<sup>11</sup> a new *BMJ* series of  
4 trustworthy clinical practice recommendations published in response to potentially practice-changing  
5 evidence.<sup>12</sup> A trial that compared the outcomes of exercise therapy versus knee arthroscopic partial  
6 meniscectomy in 140 middle-aged patients with degenerative meniscal tears, published in July 2016  
7 triggered this systematic review.<sup>13</sup> Previous systematic reviews addressing the impact of arthroscopic  
8 knee surgery did not consider all patient-important outcomes; did not consider patient importance when  
9 addressing patient-reported outcomes such as pain, function, and quality of life (QoL); and did not  
10 include all currently available randomized controlled trials (RCTs).<sup>14 15</sup>  
11  
12

13  
14  
15  
16  
17  
18 To determine the effects and complications in patients with symptomatic degenerative knee disease, we  
19 performed a systematic review and meta-analysis of arthroscopic surgery with debridement, and/or partial  
20 meniscectomy compared to conservative management strategies.  
21  
22

## 23 24 25 26 **METHODS**

27  
28 Readers can access the protocol of this systematic review in PROSPERO (CRD42016046242). According  
29 to the *BMJ* Rapid Recommendations process,<sup>12</sup> a guideline panel provided critical oversight to the review  
30 and identified populations, subgroups, and outcomes of interest. The panel included eight content experts  
31 and front line clinicians (three orthopaedic surgeons, one rheumatologist, one epidemiologist, one general  
32 practitioner and two physiotherapists), four methodologists (three of them whom are also front line  
33 clinicians and general internists) and three patients with lived experience of degenerative knee disease.  
34  
35  
36

37  
38  
39 All patients received personal training and support to optimize contributions throughout the guideline  
40 development process. The patient panel members led the interpretation of the results based on what they  
41 expected the typical patient values and preferences to be, as well as the variation between patients. We  
42 also considered patients' values and preferences by using the minimally important difference (MID) to  
43 interpret the results obtained in the meta-analyses. These MIDs were obtained from a systematic review  
44 of studies in which patients were directly asked about the magnitude of change they had experienced, and  
45 whether that change was trivial, small but important, or larger.<sup>16</sup> Clinical experts who were part of the  
46 team of that systematic review judged the applicability of such studies to the target population and raised  
47 no concerns.  
48  
49  
50  
51  
52

## 53 54 55 **Eligibility criteria**

56  
57  
58  
59  
60

1  
2  
3 For the effects of arthroscopic surgery, we included RCTs comparing arthroscopic surgery, including any  
4 or all of debridement and/or partial meniscectomy to any conservative management strategy (exercise  
5 therapy, injections, drugs, sham surgery) in patients with symptomatic degenerative knee disease (defined  
6 as persistent knee pain that affects the patient's quality of life and does not respond to conservative  
7 treatment), with or without osteoarthritis, of any age. We excluded studies that enrolled patients with  
8 acute trauma and those that enrolled fewer than 10 patients. For the complications of arthroscopic  
9 surgery, we also included observational studies (cohort studies, registry studies, and case series) in  
10 patients with degenerative knee disease undergoing arthroscopic surgery, with or without a comparison  
11 group. We excluded studies published before the year 2000 when considering complications (but not  
12 effects).  
13  
14  
15  
16  
17  
18  
19  
20

### 21 **Literature search**

22 We performed an update of a previously published systematic review<sup>15</sup> including MEDLINE (Pubmed),  
23 EMBASE (Ovid) and CENTRAL (See Appendix 1) from January 1 2014, to August 16, 2016. In  
24 addition, we constructed specific search strategies for these three databases for one outcome not studied in  
25 the previous review (nerve damage), with no date limits. We also searched for grey literature using the  
26 first 500 hits from Google Scholar and Open Grey. We did not limit any of the searches by language of  
27 publication.  
28  
29  
30  
31  
32  
33

### 34 **Study selection and data abstraction**

35 Teams of two reviewers, working independently, performed all study selection and data abstraction using  
36 standardized forms, and reviewed the titles and abstract of all the references resulting from the searches.  
37 We retrieved and reviewed the full text of all references identified as potentially eligible by at least one  
38 reviewer. We also reviewed the full text of all references excluded at the full text screening stage in the  
39 prior review.<sup>17</sup> We included all studies judged as eligible by the two reviewers. Reviewers resolved  
40 disagreements by discussion.  
41  
42  
43  
44  
45  
46

47 Reviewers abstracted characteristics of eligible studies including study design, number of patients  
48 enrolled, age and sex distribution, number of patients followed-up, whether partial meniscectomy was  
49 performed, co-interventions, and outcomes, including pain, function, quality of life, and knee  
50 replacement. When authors reported results from more than one measure of pain or function, we decided  
51 a priori to use only the measure ranked highest in a hierarchy of patient-reported outcomes specific to the  
52 patients of interest.<sup>18</sup> When studies had more than two arms, we only used the data from the arms relevant  
53  
54  
55  
56  
57  
58  
59  
60

1  
2  
3 to this study. The review addressed these outcomes at 3 months or less, and at the longest follow-up  
4 reported.  
5  
6

7  
8 The review addressed complication outcomes of mortality, venous thromboembolism (VTE), infection,  
9 and nerve damage. Reviewers abstracted the absolute number of patients who experienced the outcomes  
10 over the follow-up period. When studies did not report VTE but reported pulmonary embolism and deep-  
11 vein thrombosis separately instead, we used these numbers to estimate the number of VTEs, considering  
12 the potential overlap due to patients experiencing both.<sup>19</sup> We examined these outcomes over the three  
13 months following surgery.  
14  
15  
16  
17

### 18 19 **Summary measures and data synthesis**

20 We summarized continuous outcomes (pain, function and quality of life) at the study level using the  
21 difference in change from baseline between groups. When baseline mean and standard deviation per  
22 group at baseline and follow-up, but not change measures, were available, we assumed a within group  
23 correlation of 0.5 to estimate the standard deviation of the change from baseline per study arm. If arm  
24 level data were not reported, we abstracted the difference in change from baseline between the groups.  
25 When standard deviations at follow up were not reported, we assumed the same standard deviation as at  
26 baseline. When no standard deviations were available, we used the weighted average from all the other  
27 RCTs measuring the outcome with the same instrument. When studies reported medians and interquartile  
28 ranges, we converted to means and standard deviations.<sup>20</sup>  
29  
30  
31  
32  
33  
34  
35  
36

37 We performed meta-analyses, and present results for patient reported continuous outcomes in two ways.  
38 First, we transformed all scores to the scale of an index instrument, the highest in the hierarchy, and  
39 pooled results of all studies using the mean difference as the summary measure. This resulted in scores  
40 that could range from 0 to 100, in which higher scores signified better outcomes (less pain, better  
41 function, better quality of life). Second, we used the minimally important difference (MID) of each of the  
42 instruments to determine the proportion of patients who reached a change in the outcome that was larger  
43 than a MID. To inform this analysis, a parallel team performed a linked systematic review to establish the  
44 most credible MIDs for each of the instruments used to measure pain, function, and QoL. The most  
45 credible MID was the median of all the credible MIDs. Details of this review are available in a  
46 publication related to this *BMJ* Rapid Recommendation.<sup>16</sup> We then estimated and pooled the difference in  
47 the proportion of patients between groups achieving this difference.<sup>17</sup> When no credible MID was found  
48 for a particular instrument, we used the MID of the index instrument. Data for time-to-knee replacement  
49 was not available, so we summarized the data for knee replacement using the proportion of patients who  
50  
51  
52  
53  
54  
55  
56  
57  
58  
59  
60

1  
2  
3 had the outcome per group and pooled those data using relative risk as the summary measure. These  
4 meta-analyses were performed using random effects models using the Hartung-Knapp-Sidik-Jonkman  
5 method.<sup>21 22</sup> All analyses were performed using an intention-to-treat approach. When authors did not  
6 report data in a way that allowed incorporation it in the meta-analyses, we summarized the results  
7  
8  
9  
10 narratively.

11  
12  
13 For complications, we used the number of patients having the event and the total number of patients  
14 undergoing knee arthroscopy, and pooled these data using a generalized linear mixed effects model that  
15 allowed inclusion of studies with no events without a continuity correction.<sup>23</sup>  
16  
17

18  
19 We planned to perform four subgroup analyses for the outcomes pain and function: trials in which there  
20 was more than 50% of patients with radiographic osteoarthritis (defined as Kellgren-Lawrence grades 2 to  
21 4) versus trials with equal or less than 50% of patients with radiographic osteoarthritis; trials in which  
22 patients were blinded versus not blinded; trials in which meniscectomy was performed versus those in  
23 which it was not; and trials in which a control group received an active intervention (e.g. exercise therapy,  
24 injections) versus control groups without such interventions (e.g. waiting list, no treatment). We  
25 performed sensitivity analyses for calculating the difference in patients who achieve a change higher than  
26 the MID in two ways: 1) using the lowest and highest value of the MID of each instrument, based on the  
27 range of the MIDs that were deemed credible, and 2) calculating the standardized mean difference and  
28 then transforming the standardized mean difference into a risk difference<sup>17</sup> (this method does not use an  
29 MID). All data analyses used the package *meta* in the software R, version 3.3.1.<sup>24</sup>  
30  
31  
32  
33  
34  
35  
36  
37  
38

### 39 **Certainty of the evidence assessments**

40 We assessed the certainty of the estimates of effect (quality of evidence) using the GRADE approach.<sup>25</sup>  
41 We considered potential limitations in risk of bias, inconsistency, imprecision, indirectness, and  
42 publication bias.<sup>26-29</sup> We used a modification of the Cochrane Risk of Bias tool<sup>30</sup> to assess the risk of bias  
43 of the studies informing on the effects of arthroscopic surgery, and the relevant items of the  
44 Methodological Index for Non-Randomized Studies (MINORS) tool<sup>31</sup> to assess the risk of bias of the  
45 studies informing on the complications of knee arthroscopy. All authors, in consultation with the parallel  
46 *BMJ* Rapid Recommendation guideline panel<sup>32</sup> participated in, and came to consensus regarding,  
47  
48  
49  
50  
51  
52  
53  
54  
55  
56  
57  
58  
59  
60  
certainty of estimates ratings.

The median of the change in score in the control arm from the studies that reported this information and  
did not use sham surgery as a control provided estimates of expected outcome in the control group (which

1  
2  
3 is the equivalent of the baseline risk in dichotomous outcomes), which informed calculation of absolute  
4 estimates of effect. Summary of findings tables<sup>33</sup> created using MAGICapp<sup>34</sup> summarized key  
5 information for all patient-important outcomes.  
6  
7  
8  
9

## 10 11 **RESULTS**

12  
13 Of 710 unique references screened in title and abstract, 149 articles underwent full text screening, of  
14 which 13 RCTs informing the effects of knee arthroscopy<sup>13 35-47</sup> and 15 studies informing the  
15 complications of knee arthroscopy (12 OS<sup>48-59</sup> and 3 RCTs<sup>13 39 44</sup>) proved eligible (Figure 1).  
16  
17  
18

### 19 **Effects**

#### 20 *Study Characteristics*

21  
22 The 13 eligible RCTs were published between 1993 and 2016, recruited a median of 119 patients, and  
23 enrolled patients with mean age from 48.9<sup>45</sup> to 62.8<sup>35</sup> years old, and a sex distribution from 5%<sup>41</sup> to  
24 81.7%<sup>43</sup> women. Two studies performed sham surgery in the control group,<sup>41 44</sup> while most of the other  
25 studies used exercise therapy.<sup>13 36 37 39 40 42 45 47</sup> Table 1 presents details of study characteristics.  
26  
27  
28  
29  
30  
31  
32  
33  
34  
35  
36  
37  
38  
39  
40  
41  
42  
43  
44  
45  
46  
47  
48  
49  
50  
51  
52  
53  
54  
55  
56  
57  
58  
59  
60

Table 1: Characteristics of randomised clinical trials included in systematic review of effects

| Study                                           | Number of patients enrolled | Comparator                | Patients age (mean) | % females | ROA > 50% <sup>1</sup> | Pain measure <sup>2</sup>       | Baseline mean intervention (SD) | Baseline mean control (SD) | Function measure <sup>2</sup>   | Baseline mean (SD) | Baseline mean control (SD) |
|-------------------------------------------------|-----------------------------|---------------------------|---------------------|-----------|------------------------|---------------------------------|---------------------------------|----------------------------|---------------------------------|--------------------|----------------------------|
| Chang, 1993 <sup>35</sup>                       | 34                          | Close needle joint lavage | 62.8                | 71.6      | Y                      | AIMS pain                       | 65 (20)                         | 61 (21)                    | AIMS physical function          | 23 (16)            | 17 (10)                    |
| Gauffin, 2014 <sup>36</sup>                     | 150                         | Exercise therapy          | 54.5                | 27.3      | N                      | KOOS pain                       | 55 (18)                         | 58 (18)                    | KOOS ADL                        | 65 (18)            | 68 (22)                    |
| Herrlin, 2007, <sup>37</sup> 2013 <sup>38</sup> | 96                          | Exercise therapy          | 54                  | 38.9      | N                      | KOOS pain                       | 56 (18)                         | 63 (21)                    | KOOS ADL                        | 68 (21)            | 73 (20)                    |
| Katz, 2013 <sup>39</sup>                        | 351                         | Exercise therapy          | 58.4                | 56.7      | Y                      | KOOS pain                       | 54 (16)                         | 53 (16)                    | WOMAC function                  | 37 (18)            | 38 (18)                    |
| Kirkley, 2008 <sup>40</sup>                     | 188                         | Exercise therapy          | 59.6                | 62.9      | Y                      | WOMAC pain                      | 52 (21)                         | 43 (24)                    | WOMAC function                  | 51 (21)            | 43 (23)                    |
| Kise, 2016 <sup>13</sup>                        | 140                         | Exercise therapy          | 49.6                | 39        | Y                      | KOOS pain                       | 68 (15)                         | 63 (21)                    | KOOS ADL                        | 80 (16)            | 75 (22)                    |
| Moseley, 2002 <sup>41</sup>                     | 119                         | Sham surgery              | 52.8                | 5         | Y                      | SF-36 body pain                 | 39 (19)                         | 38 (18)                    | SF-36 physical function         | 42 (22)            | 47 (23)                    |
| Osteras, 2012 <sup>42</sup>                     | 17                          | Exercise therapy          | 49.7                | 23.6      | N                      | VAS                             | 37 (10)                         | 35 (17)                    | NM                              | -                  | -                          |
| Saeed, 2015 <sup>43</sup>                       | 120                         | Hyaluronic acid injection | NR                  | 81.7      | NR                     | Knee society score <sup>3</sup> | NR                              | NR                         | Knee society score <sup>3</sup> | NR                 | NR                         |
| Sihvonen, 2013 <sup>60</sup>                    | 146                         | Sham surgery              | 52                  | 39        | N                      | VAS                             | 58 (20)                         | 61 (20)                    | Lysholm knee score <sup>3</sup> | NA                 | NA                         |
| Stensrud, 2015 <sup>45</sup>                    | 82                          | Exercise therapy          | 48.9                | 35.4      | N                      | Ordinal scale                   | NR                              | NR                         | Ordinal scale                   | NR                 | NR                         |
| Vermesan, 2013 <sup>46</sup>                    | 114                         | Steroid injection         | 58.4                | 79.2      | NR                     | Oxford knee score <sup>3</sup>  | NR                              | NR                         | Oxford knee score <sup>3</sup>  | NR                 | NR                         |
| Yim, 2013 <sup>47</sup>                         | 108                         | Exercise therapy          | 56.8                | 79.4      | N                      | VAS                             | 52 (18)                         | 49 (15)                    | Lysholm score <sup>3</sup>      | NA                 | NA                         |

ROA: Radiographic osteoarthritis, NR: not reported, NM: not measured, NA: not applicable

1. Based on Kellgren-Lawrence classification. Grades 2-4 were considered radiographic OA
2. All measures were converted to 0-100 scale. Higher scores mean less pain and better function
3. Instrument combines pain and function together

### *Effects of knee arthroscopy*

Table 2 presents the GRADE Summary of Findings for effects of knee arthroscopy compared to control. Patients who underwent arthroscopic surgery had a change in pain scores larger on average than patients who received control, both in the short (5.4 points on a 100-point scale, 95% CI 2.0; 8.8, n=10 studies, 1231 patients, Appendix Figure 1), and long-term (3.1 95% CI -0.2; 6.4, n= 8 studies, 1097 patients, Appendix Figure 2). The minimally important difference for this outcome measured with the index instrument (KOOS pain subscale) was 12 points.<sup>61</sup> Using the MIDs specific to each instrument,<sup>16</sup> 12.4% more patients receiving arthroscopy achieved an improvement in pain greater than the MID (n=11 studies, 1102 patients) in the short-term.

Over the first three months of follow-up, the median average of improvement in pain was 15 points in patients who received conservative management versus 20 points in patients who underwent knee arthroscopy; over the long term, the median average improvement 19 points in patients who received conservative management, versus 22 points in patients who underwent knee arthroscopy.

Patients who underwent arthroscopic surgery had an improvement in function score that was, on average, 4.9 points larger on a 100-point scale than patients who received control in the short-term (95% CI 1.5; 8.4, n= 7 studies, 964 patients, Appendix Figure 3), and 3.2 points larger (95% CI -0.5; 6.8, n= 6 studies, 843 patients Appendix Figure 4) in the long term. The minimally important difference for this outcome measured with the index instrument (KOOS ADL subscale) was 8 points.<sup>61</sup> The probability of achieving a change in function higher than the MID was 13.4% higher in patients receiving arthroscopy (n= 6 studies, 835 patients) in the short-term.

In the short term, patients who received conservative management achieved a median average improvement in function of 9 points, versus 14 points in patients who underwent knee arthroscopy; over the long term, the median average improvement was 10 points in patients who received conservative management, versus 13 points in patients who underwent knee arthroscopy.

We were able to perform subgroup analyses according to blinding of patients and proportion of patients with radiographic osteoarthritis >50% for both of these outcomes. None of the analyses showed differences in results between groups (Appendix Figures 5-12). All RCTs performed partial meniscectomy as part of the intervention when needed, and all used active comparators. Therefore, we did not perform subgroup analyses for these variables.

1  
2  
3  
4  
5 Sensitivity analyses showed that for both short-term pain and short-term function, results using the upper  
6 and lower limit of the MID estimate, and the approach using the standardized mean difference, in all  
7 cases yielded lower estimates of the numbers with important benefit from arthroscopy than did our  
8 primary analysis (Appendix 2).  
9  
10

11  
12  
13 Changes in QoL scores were similar between patients undergoing knee arthroscopy and patients receiving  
14 control. In the short-term, the difference in change from baseline scores was 6.0 points greater for knee  
15 arthroscopy (95% CI -1.5; 13.5, n= 1 study, 120 patients). In the long-term, the difference in change from  
16 baseline was 2.1 points (95% CI -1.0; 5.2, n= 2 studies, 269 patients, Appendix Figure 13). The MID for  
17 the index instrument (EQ5D) is 15 points.<sup>62</sup> The median average of improvement in QoL was 8.0 points  
18 in patients who received conservative management versus 14.0 points in patients who underwent knee  
19 arthroscopy in the short term; and 10.3 points in patients who received conservative management, versus  
20 12.4 points in patients who underwent knee arthroscopy.  
21  
22  
23  
24  
25  
26  
27

28 The risk of undergoing knee replacement up to 1 year after the intervention was 1.89 times higher in  
29 patients undergoing knee arthroscopy (95% CI 0.51; 7, n= 2 studies, 497 patients, Appendix Figure 14).  
30  
31  
32  
33  
34  
35  
36  
37  
38  
39  
40  
41  
42  
43  
44  
45  
46  
47  
48  
49  
50  
51  
52  
53  
54  
55  
56  
57  
58  
59  
60



Table 2: Summary of findings for the effects of knee arthroscopy versus control in patients with degenerative knee disease

| Outcome<br>Timeframe                                                                                  | Study results and<br>measurements                                                                                                                                                                                                                     | Absolute effect estimates                                                                                                                                                                                                                                                                                                                                           |                               | Certainty in effect estimates<br>(Quality of evidence)                                                     | Summary                                                                                                                                                 |
|-------------------------------------------------------------------------------------------------------|-------------------------------------------------------------------------------------------------------------------------------------------------------------------------------------------------------------------------------------------------------|---------------------------------------------------------------------------------------------------------------------------------------------------------------------------------------------------------------------------------------------------------------------------------------------------------------------------------------------------------------------|-------------------------------|------------------------------------------------------------------------------------------------------------|---------------------------------------------------------------------------------------------------------------------------------------------------------|
|                                                                                                       |                                                                                                                                                                                                                                                       | Conservative<br>management                                                                                                                                                                                                                                                                                                                                          | Arthroscopy                   |                                                                                                            |                                                                                                                                                         |
| <b>Short term</b>                                                                                     |                                                                                                                                                                                                                                                       |                                                                                                                                                                                                                                                                                                                                                                     |                               |                                                                                                            |                                                                                                                                                         |
| Pain (difference in<br>change from<br>baseline)<br>3 months                                           | Measured by: Different<br>instruments converted to<br>scale of index instrument<br>(KOOS pain sub scale)<br>Scale: 0-100 High better,<br>Minimally important<br>difference 12)<br>Data from 1231 patients in<br>10 studies<br>Follow up 3 months      | <b>15.0<br/>points (Mean)</b>                                                                                                                                                                                                                                                                                                                                       | <b>20.0<br/>points (Mean)</b> | <b>High</b>                                                                                                | On average, knee<br>arthroscopy results in very<br>small extra reduction in<br>pain scores when<br>compared to control                                  |
| Pain (difference in<br>patients who<br>achieve a change<br>higher than the<br>MID)<br>3 months        | Data from 1102 patients in 9<br>studies<br>Follow up 3 months                                                                                                                                                                                         | <b>669<br/>per 1000</b>                                                                                                                                                                                                                                                                                                                                             | <b>793<br/>per 1000</b>       | <b>High</b>                                                                                                | Knee arthroscopy<br>increases the number of<br>patients with an important<br>reduction in short-term<br>pain by approximately 12<br>in 100              |
| Function<br>(difference in<br>change from<br>baseline)<br>3 months                                    | Measured by: Different<br>instruments converted to<br>scale of index instrument<br>(KOOS ADL sub scale,<br>Scale: 0-100, High better<br>Minimally important<br>difference 8)<br>Based on data from 964<br>patients in 7 studies<br>Follow up 3 months | <b>9.0<br/>points (Mean)</b>                                                                                                                                                                                                                                                                                                                                        | <b>14.0<br/>points (Mean)</b> | <b>Moderate</b><br>Due to serious risk of bias, borderline<br>inconsistency, and borderline<br>imprecision | Knee arthroscopy may<br>increase function change<br>slightly more than control                                                                          |
| Function<br>(difference in<br>patients who<br>achieve a change<br>higher than the<br>MID)<br>3 months | Based on data from 835<br>patients in 6 studies<br>Follow up 3 months                                                                                                                                                                                 | <b>519<br/>per 1000</b>                                                                                                                                                                                                                                                                                                                                             | <b>653<br/>per 1000</b>       | <b>Moderate</b><br>Due to serious risk of bias                                                             | Knee arthroscopy<br>probably increases the<br>number of patients with an<br>important improvement in<br>short-term function<br>approximately 13 in 100. |
| Quality of life<br>(difference in<br>change from<br>baseline)<br>3 months                             | Measured by: EQ5D VAS-<br>Scale: 0-100 High better<br>Minimally important<br>difference 15<br>Based on data from 120<br>patients in 1 studies<br>Follow up 3 months                                                                                   | <b>8.0<br/>points (Mean)</b>                                                                                                                                                                                                                                                                                                                                        | <b>14.0<br/>points (Mean)</b> | <b>Low</b><br>Due to serious risk of bias, Due to<br>serious imprecision                                   | Knee arthroscopy may<br>have, on average, little or<br>no difference on QoL<br>change, compared to<br>control.                                          |
| Pain and function<br>up to 3 months                                                                   | Based on data from 316<br>patients in 3 studies<br>Follow up up to 3 months                                                                                                                                                                           | Three studies evaluated the effects of<br>knee arthroscopy in pain and function<br>using measures that combined these<br>two outcomes together or that could not<br>be pooled. One study reported a<br>difference in change from baseline in<br>the Oxford knee score that favoured<br>arthroscopy by 4.9 points (95% CI<br>3.61; 6.20, 114 patients) over steroids |                               | <b>Moderate</b><br>Due to serious risk of bias                                                             | Knee arthroscopy<br>probably has little or no<br>difference in pain and<br>function when compared<br>to control                                         |

|                                                                   |                                                                                                                                                                                                                                      |                                                                                                                                                                                                                                                                                                                                                                                  |                                                                           |                                                                                                                |
|-------------------------------------------------------------------|--------------------------------------------------------------------------------------------------------------------------------------------------------------------------------------------------------------------------------------|----------------------------------------------------------------------------------------------------------------------------------------------------------------------------------------------------------------------------------------------------------------------------------------------------------------------------------------------------------------------------------|---------------------------------------------------------------------------|----------------------------------------------------------------------------------------------------------------|
|                                                                   |                                                                                                                                                                                                                                      | injections. A second study reported no differences in the median in an overall self- assessment based on a 7-point ordinal scale (82 patients) when comparing knee arthroscopy to exercise therapy. The third study reported that patients who received intra-articular hyaluronic acid injections reported less pain than patients who received knee arthroscopy (120 patients) |                                                                           |                                                                                                                |
| <b>Long term</b>                                                  |                                                                                                                                                                                                                                      |                                                                                                                                                                                                                                                                                                                                                                                  |                                                                           |                                                                                                                |
| Pain (difference in change from baseline)<br>1-2 years            | Measured by: Different instruments converted to scale of index instrument (KOOS pain sub scale- Minimally Important Difference 12)<br>Scale: 0-100 High better<br>Based on data from 1097 patients in 8 studies<br>Follow up 2 years | <b>19.0 points (Mean)</b><br><b>22.0 points (Mean)</b><br><b>Difference: Mean Difference 3.13 more</b><br>(CI 95% 0.17 fewer - 6.43 more)                                                                                                                                                                                                                                        | <b>High</b>                                                               | On average, knee arthroscopy results in no difference, or a very small reduction, in pain                      |
| Function (difference in change from baseline)<br>1-2 years        | Measured by: Different instruments converted to scale of index instrument (KOOS ADL sub scale- Minimally Important Difference 8)<br>Scale: 0-100 High better<br>Based on data from 843 patients in 6 studies<br>Follow up 2 years    | <b>10.0 points (Mean)</b><br><b>13.0 points (Mean)</b><br><b>Difference: Mean Difference 3.16 more</b><br>(CI 95% 0.48 less - 6.8 more)                                                                                                                                                                                                                                          | <b>Moderate</b><br>Due to serious risk of bias and borderline imprecision | On average, knee arthroscopy probably does results in no improvement, or a very small improvement, in function |
| Quality of life (difference in change from baseline)<br>1-2 years | Measured by: EQ5D VAS, 15D (converted to EQ5D scale- MID 15)<br>Scale: 0-100 High better<br>Based on data from 269 patients in 2 studies<br>Follow up 1 year                                                                         | <b>10.3 points (Mean)</b><br><b>12.4 points (Mean)</b><br><b>Difference: Mean Difference 2.12 more</b><br>(CI 95% 0.96 fewer - 5.21 more)                                                                                                                                                                                                                                        | <b>High</b>                                                               | On average, knee arthroscopy does not result in an important improvement in quality of life                    |
| Knee replacement<br>1-2 years                                     | Relative risk: 1.89 (CI 95% 0.51 - 7.0)<br>Based on data from 497 patients in 2 studies<br>Follow up 1 year                                                                                                                          | <b>12 per 1000</b><br><b>23 per 1000</b><br><b>Difference: 11 more per 1000</b><br>(CI 95% 107 more - 6 fewer)                                                                                                                                                                                                                                                                   | <b>Moderate</b><br>Due to serious imprecision                             | On average, knee arthroscopy does not result in an increase in the risk of knee replacement                    |
| Pain and function<br>1-2 years                                    | Based on data from 114 patients in 1 studies<br>Follow up 1 year                                                                                                                                                                     | One study measured pain and function using a composite score. The study showed that patients who receive arthroscopy have a change in Oxford knee score 2.6 points higher than patients receiving steroids injections (95% CI 1.14; 4.06)                                                                                                                                        | <b>Moderate</b><br>Due to serious risk of bias                            | Knee arthroscopy probably has little or no difference on pain and function                                     |

### *Certainty of the evidence*

There was high certainty in the estimates of effects for the outcome pain and moderate certainty in the estimates of effect for the outcome function. Although risk of bias due to lack of blinding that could affect the patient-reported outcomes was a concern in most of the trials, and the proportion of losses to follow-up was higher than desirable (Appendix Figure 15), for pain, trials with a low risk of bias reported similar

1  
2  
3 results to those in which there were risk of bias concerns (Appendix Figures 5 and 7). For function, there  
4 was less evidence from trials at low risk of bias, so we rated down our certainty in evidence for risk of  
5 bias (Appendix Figures 9 and 11)). In addition, the estimates for this outcome were imprecise. There was  
6 no evidence of publication bias (Appendix Figure 16)  
7  
8  
9

10  
11 The certainty of the estimates of quality of life was low in the short term due to risk of bias and  
12 imprecision, but high in the long term. The certainty of the estimates for knee replacement was moderate  
13 due to imprecision. Table 2 presents the details of the assessments per outcome.  
14  
15  
16

## 17 **Complications**

### 18 *Study Characteristics*

19  
20 The studies included in the complications systematic review reported data from a median of 20,770  
21 patients. Average patient age ranged from 42<sup>53</sup> to 62.4<sup>57</sup> years, and the proportion of females from 39%<sup>13</sup>  
22 to 64.6%.<sup>50</sup> Table 3 presents detailed study characteristics.  
23  
24  
25  
26  
27  
28  
29  
30  
31  
32  
33  
34  
35  
36  
37  
38  
39  
40  
41  
42  
43  
44  
45  
46  
47  
48  
49  
50  
51  
52  
53  
54  
55  
56  
57  
58  
59  
60

Table 3: Characteristics of studies included in systematic review of complications

| Study                          | Design                          | Number of patients | Age (mean) | % females |
|--------------------------------|---------------------------------|--------------------|------------|-----------|
| Basques, 2015 <sup>48</sup>    | Retrospective cohort (registry) | 17774              | 53         | 46.9      |
| Bohensky, 2014 <sup>49</sup>   | Retrospective cohort (registry) | 139031             | NR         | 42.5      |
| Cancienne, 2016 <sup>50</sup>  | Prospective cohort              | 173216             | NR         | 64.6      |
| Hame, 2012 <sup>51</sup>       | Retrospective cohort (registry) | 314578             | NR         | 62        |
| Hetsroni, 2011 <sup>52</sup>   | Retrospective cohort (registry) | 418323             | 45.5       | 46.8      |
| Hoppener, 2006 <sup>53</sup>   | Retrospective cohort (registry) | 335                | 42         | 43.3      |
| Jameson, 2011 <sup>54</sup>    | Retrospective cohort (registry) | 261446             | 46         | 40.7      |
| Katz, 2013 <sup>39</sup>       | RCT                             | 174                | 59         | 55.9      |
| Kise, 2016 <sup>13</sup>       | RCT                             | 70                 | 48.9       | 39        |
| Krych, 2015 <sup>55</sup>      | Retrospective cohort (registry) | 12595              | NR         | NR        |
| Maletis, 2012 <sup>56</sup>    | Retrospective cohort (registry) | 20770              | 44         | 42.8      |
| Sihvonen, 2013 <sup>60</sup>   | RCT                             | 70                 | 52         | 58        |
| Wai, 2002 <sup>57</sup>        | Retrospective cohort (registry) | 14391              | 62.4       | 49.9      |
| Yacub, 2009 <sup>58</sup>      | Retrospective cohort (registry) | 12426              | NR         | 57.3      |
| Yeranosian, 2013 <sup>59</sup> | Retrospective cohort (registry) | 432038             | NR         | NR        |

### *Complications of knee arthroscopy*

Table 4 provides a GRADE Summary of Findings for the complications of knee arthroscopy. Patients who underwent knee arthroscopy have an extremely small risk of death that is (<1 in 1000 95% CI 0; 1, n= 7 studies, 454,086 patients, Appendix Figure 17); a risk of VTE of 5 in 1000 (95% CI 2; 10, n= 11 studies, 1 119 920 patients, Appendix Figure 18); a risk of infection of 2 in 1000 (95% CI 1; 4, n= 5 studies, 603 838 patients, Appendix Figure 19); and an extremely small risk of nerve damage (<1 in 1000 95% CI 0; 1, n=1 study, 12 426 patients).

Table 4: Summary of findings for the complications of knee arthroscopy versus control in patients with degenerative knee disease

| Outcome<br>Timeframe               | Study results and<br>measurements                                       | Absolute effect estimates  |               | Certainty in effect estimates<br>(Quality of evidence)                  | Summary                                                      |
|------------------------------------|-------------------------------------------------------------------------|----------------------------|---------------|-------------------------------------------------------------------------|--------------------------------------------------------------|
|                                    |                                                                         | Conservative<br>management | Arthroscopy   |                                                                         |                                                              |
| Mortality<br>3 months              | Based on data from 454086 patients in 7 studies<br>Follow up 3 months   | 0<br>per 1000              | 0<br>per 1000 | <b>Low</b><br>Due to serious risk of bias and serious inconsistency     | Arthroscopy may have an extremely small risk of mortality    |
| Venous thromboembolism<br>3 months | Based on data from 1119920 patients in 11 studies<br>Follow up 3 months | 0<br>per 1000              | 5<br>per 1000 | <b>Low</b><br>Due to serious risk of bias, Due to serious inconsistency | Arthroscopy may have a small risk for venous thromboembolism |
| Infection<br>3 months              | Based on data from 603838 patients in 5 studies<br>Follow up 3 months   | 0<br>per 1000              | 2<br>per 1000 | <b>Low</b><br>Due to serious risk of bias, Due to serious inconsistency | Arthroscopy may have a very small risk for infection         |
| Nerve damage<br>3 months           | Based on data from 12426 patients in 1 studies<br>Follow up 3 months    | 0<br>per 1000              | 0<br>per 1000 | <b>Low</b><br>Due to serious risk of bias, Due to serious indirectness  | Arthroscopy may have an extremely small risk of nerve damage |

### *Certainty of the evidence*

The estimates of complications of knee arthroscopy had low certainty. All studies suffered from risk of bias concerns, mainly due to the retrospective nature of the data collection (using data that had not been collected for the purposes of the study) (Appendix Figure 20). The studies informing mortality, VTE and infection showed inconsistent results from both a clinical and statistical perspective, which resulted in rating down the certainty for the pooled estimate. Finally, the only study informing nerve damage included patients with arthroscopy of the shoulder as well,<sup>58</sup> and therefore warranted rating down this estimate for indirectness. There was no evidence of publication bias (Appendix Figure 21). Table 4 presents details regarding the assessments of the certainty of the complications of knee arthroscopy per outcome.

## DISCUSSION

This systematic review provides high quality evidence that patients with degenerative knee disease who undergo arthroscopy experience, on average, very small benefits in pain, function, and quality of life over

1  
2  
3 periods of up to three months when compared to patients who receive a conservative management  
4 strategy (Table 2). Results up to two years failed to show benefits in pain or function, and excluded any  
5 but very small benefits (Table 2). The median of the average pain change in patients receiving  
6 conservative management was 15 points in the short-term and 19 points in the long term (MID 12 points).  
7 Patients receiving arthroscopy had an average change 5.4 points higher in the short-term, and 3.1 points  
8 higher in the long term. These differences were not patient important. Thus, whether patients receive  
9 arthroscopy or not, the clinical trial experience suggests, on average, a small benefit in pain reduction  
10 over both the short and long term.  
11  
12

13  
14  
15  
16  
17  
18 The results for function proved similar, with very small average differences in the short term, and no  
19 convincing evidence of benefit in the long term (Table 2). Patients who received a conservative  
20 management strategy had a median average change of 9 points in the short term and 10 points in the long  
21 term, corresponding (MID 8 points). Risk of bias limitations leave this evidence less secure (moderate  
22 quality) than for pain.  
23  
24  
25

26  
27  
28 Study results provide high quality evidence that the benefits of arthroscopic surgery on quality of life over  
29 the long term are minimal, if they exist at all (Table 2). Low quality evidence raises the possibility of a  
30 higher risk of knee replacement with arthroscopic surgery.  
31  
32

33  
34 We found a low risk of serious adverse effects in patients undergoing knee arthroscopy. The risk of  
35 mortality and nerve damage may be close to 0, while the risk of VTE and infection may be 5 and 2 in  
36 1000 patients, respectively. We have low certainty in this evidence, however, because the studies included  
37 were likely to be biased and showed results that were inconsistent.  
38  
39  
40

41  
42 Our systematic review has particular strengths. First, it provides the most comprehensive and trustworthy  
43 body of evidence up to date, including 10 studies not included in the most recent prior review.<sup>15</sup> While the  
44 conclusions of our systematic review may not be qualitatively different from the conclusions of previous  
45 reviews addressing the same question, we believe that all the additions in terms of studies included and  
46 methods for summarizing, presenting, and appraising the evidence strengthen the conclusions derived  
47 from this body of evidence considerably. Second, this systematic review was developed in parallel with a  
48 BMJ Rapid Recommendation according to predefined standards, methods and processes.<sup>12</sup> Extensive  
49 input from content experts and patients in the guideline panel throughout the process secured appropriate  
50 selection of outcomes and analyses as well as appropriate interpretation of the results from the systematic  
51 review. The Rapid Recommendations published together with our linked systematic review should  
52  
53  
54  
55  
56  
57  
58  
59  
60

1  
2  
3 provide clinicians and their patients with optimal guidance in practice and will also allow other guideline  
4 organizations to re-use or adapt content to their contexts, if needed. Third, by converting all the  
5 instruments to the scale of an index instrument we do not only overcome the potential limitations of using  
6 the standardized mean difference (namely, the analysis depending on a similar standard deviation across  
7 studies, and the resulting measure of effect being difficult to interpret), but also provide an estimate of the  
8 proportion of patients who would achieve a minimally important change per arm, and the difference  
9 between these proportions. This allows incorporating patients' values and preferences explicitly when  
10 interpreting the results. A rigorous linked systematic review of studies addressing the issue informed our  
11 estimates of the minimally important change<sup>16</sup> and our results were robust to accounting for the  
12 uncertainty in the MID, as well as to calculating the proportion who might benefit using an approach  
13 relying on the standardized mean difference. Fourth, we provide an explicit and transparent assessment  
14 of the certainty in the absolute estimates of effect, which considers limitations of the evidence with  
15 regards to risk of bias, inconsistency, imprecision, indirectness, and publication bias.<sup>63</sup>  
16  
17  
18  
19  
20  
21  
22  
23  
24  
25

26 Our review is limited by suboptimal reporting in many of the original studies, requiring imputing standard  
27 deviations and, in a number of studies, estimating correlations between baseline and follow-up. It is  
28 possible that there is a subgroup of patients – for instance, those with locking symptoms – who do achieve  
29 substantial benefit from arthroscopic knee surgery. The available studies do not, however, provide  
30 evidence of any such subgroup. The burden of proof now rests with those who claim that such a  
31 subpopulation exists, with compelling RCT evidence required to substantiate the claim.  
32  
33  
34  
35  
36

37 In summary, our results provide low quality evidence that knee arthroscopy is a safe procedure with a low  
38 risk of complications and moderate to high quality evidence that the procedure provides very small  
39 benefits in pain and function over conservative therapy in the short term. The evidence fails to support a  
40 persistence of these benefits over the long term. Patients and their health care providers must trade off the  
41 marginal short term benefits against the burden of the surgical procedure (pain, swelling, limited mobility,  
42 restriction of activities, over a period of 2 to 6 weeks).  
43  
44  
45  
46  
47

48 **FUNDING:** This research received no specific grant from any funding agency in the public, commercial,  
49 or not-for-profit sectors. RB is funded by an Australian National Health and Medical Research Council  
50 (NHMRC) Senior Principal Research Fellowship.  
51  
52  
53  
54

55 **CONTRIBUTORSHIP STATEMENT:** GHG and POV conceived the study idea. RBP performed the  
56 literature search. SS, BS, YC, NE and RBP performed screening, data abstraction and risk of bias  
57  
58  
59  
60

1  
2  
3 assessments. RBP performed the data analysis. RBP, RB and GHG interpreted the data analysis. RBP  
4 and GHG interpreted the data performed certainty of evidence assessments. RBP wrote the first draft of  
5 the manuscript. GHG, POV, RB, and RP critically revised the manuscript. All authors approved the final  
6 version of the manuscript. RBP had full access to all of the data in the study, and takes responsibility for  
7 the integrity of the data and the accuracy of the data analysis. RBP is guarantor.  
8  
9  
10

11  
12  
13 **ACKNOWLEDGMENTS:** We thank members of the Rapid Recommendations panel for critical  
14 feedback on outcome and subgroup selection, GRADE judgments, and manuscript feedback, including  
15 Reed Siemieniuk (panel chair and internist), Ian A. Harris (orthopaedic surgeon), Martin Englund  
16 (epidemiologist), Casey Quinlan (patient representative), (patient representative), Hazel M Wilson  
17 (patient representative), Anne Lydiatt (patient representative), Lyubov Lytvyn (patient liaison expert),  
18 Nina Rydland (physiotherapist), Stijn van de Welde (physiotherapist), Thomas Agoritsas (methodologist,  
19 internist) and Annette Kristiansen (methods editor and internist).  
20  
21  
22  
23  
24  
25

26 **COMPETING INTERESTS:** All authors have completed the ICMJE uniform disclosure form at  
27 [www.icmje.org/coi\\_disclosure.pdf](http://www.icmje.org/coi_disclosure.pdf) and declare: no support from any organization for the submitted work;  
28 no financial relationships with any organizations that might have an interest in the submitted work in the  
29 previous three years; no other financial relationships that could appear to have influenced the submitted  
30 work.  
31  
32  
33  
34  
35

36 **ETHICAL APPROVAL:** Not required.  
37  
38

39 **TRANSPARENCY DECLARATION:** RBP affirms that the manuscript is an honest, accurate, and  
40 transparent account of the study being reported; that no important aspects of the study have been omitted;  
41 and that any discrepancies from the study as planned have been explained.  
42  
43  
44

45 **DATA SHARING STATEMENT:** Extra data is available in the publication of the BMJ Rapid  
46 Recommendation in MAGICapp.  
47  
48  
49  
50  
51  
52  
53  
54  
55  
56  
57  
58  
59  
60



1  
2  
3  
4  
5  
6  
7  
8  
9  
10  
11  
12  
13  
14  
15  
16  
17  
18  
19  
20  
21  
22  
23  
24  
25  
26  
27  
28  
29  
30  
31  
32  
33  
34  
35  
36  
37  
38  
39  
40  
41  
42  
43  
44  
45  
46  
47  
48  
49  
50  
51  
52  
53  
54  
55  
56  
57  
58  
59  
60

For peer review only

## References

1. Mahir L, Belhaj K, Zahi S, et al. Impact of knee osteoarthritis on the quality of life. *Annals of physical and rehabilitation medicine* 2016;59s:e159. doi: 10.1016/j.rehab.2016.07.355 [published Online First: 2016/09/28]
2. Alkan BM, Fidan F, Tosun A, et al. Quality of life and self-reported disability in patients with knee osteoarthritis. *Modern rheumatology / the Japan Rheumatism Association* 2014;24(1):166-71. doi: 10.3109/14397595.2013.854046 [published Online First: 2013/11/23]
3. Lawrence RC, Felson DT, Helmick CG, et al. Estimates of the prevalence of arthritis and other rheumatic conditions in the United States. Part II. *Arthritis and rheumatism* 2008;58(1):26-35. doi: 10.1002/art.23176 [published Online First: 2008/01/01]
4. Cullen KA, Hall MJ, Golosinskiy A. Ambulatory surgery in the United States, 2006. *National health statistics reports* 2009(11):1-25. [published Online First: 2009/03/20]
5. Roos EM, Roos HP, Ryd L, et al. Substantial disability 3 months after arthroscopic partial meniscectomy: A prospective study of patient-relevant outcomes. *Arthroscopy : the journal of arthroscopic & related surgery : official publication of the Arthroscopy Association of North America and the International Arthroscopy Association* 2000;16(6):619-26. doi: 10.1053/jars.2000.4818 [published Online First: 2000/09/08]
6. Pihl K, Roos EM, Nissen N, et al. Over-optimistic patient expectations of recovery and leisure activities after arthroscopic meniscus surgery. *Acta orthopaedica* 2016;87(6):615-21. doi: 10.1080/17453674.2016.1228411 [published Online First: 2016/09/14]
7. Jevsevar DS, Brown GA, Jones DL, et al. The American Academy of Orthopaedic Surgeons evidence-based guideline on: treatment of osteoarthritis of the knee, 2nd edition. *The Journal of bone and joint surgery American volume* 2013;95(20):1885-6. [published Online First: 2013/11/30]
8. Brown GA. AAOS clinical practice guideline: treatment of osteoarthritis of the knee: evidence-based guideline, 2nd edition. *The Journal of the American Academy of Orthopaedic Surgeons* 2013;21(9):577-9. doi: 10.5435/jaaos-21-09-577 [published Online First: 2013/09/03]
9. Krych AJ, Carey JL, Marx RG, et al. Does arthroscopic knee surgery work? *Arthroscopy : the journal of arthroscopic & related surgery : official publication of the Arthroscopy Association of North America and the International Arthroscopy Association* 2014;30(5):544-5. doi: 10.1016/j.arthro.2014.02.012 [published Online First: 2014/03/20]
10. Zhang W, Moskowitz RW, Nuki G, et al. OARSI recommendations for the management of hip and knee osteoarthritis, part I: critical appraisal of existing treatment guidelines and systematic review of current research evidence. *Osteoarthritis and cartilage / OARS, Osteoarthritis Research Society* 2007;15(9):981-1000. doi: 10.1016/j.joca.2007.06.014 [published Online First: 2007/08/28]
11. Vandvik PO, Otto CM, Siemieniuk RA, et al. For those with severe, symptomatic aortic stenosis is transcatheter or open surgical aortic valve replacement in those at low to intermediate risk surgical risk? A clinical practice guideline. *BMJ (Co-submission)*
12. Siemieniuk RA, Agoritsas T, Macdonald H, et al. Introduction to BMJ Rapid Recommendations. *BMJ (Clinical research ed)* 2016;354:i5191. doi: 10.1136/bmj.i5191 [published Online First: 2016/09/30]
13. Kise NJ, Risberg MA, Stensrud S, et al. Exercise therapy versus arthroscopic partial meniscectomy for degenerative meniscal tear in middle aged patients: randomised controlled trial with two year follow-up. *BMJ (Clinical research ed)* 2016;354:i3740. doi: 10.1136/bmj.i3740 [published Online First: 2016/07/22]
14. Khan M, Evaniew N, Bedi A, et al. Arthroscopic surgery for degenerative tears of the meniscus: a systematic review and meta-analysis. *CMAJ : Canadian Medical Association journal = journal de l'Association medicale canadienne* 2014;186(14):1057-64. doi: 10.1503/cmaj.140433 [published Online First: 2014/08/27]
15. Thorlund JB, Juhl CB, Roos EM, et al. Arthroscopic surgery for degenerative knee: systematic review and meta-analysis of benefits and harms. *BMJ (Clinical research ed)* 2015;350:h2747. doi: 10.1136/bmj.h2747 [published Online First: 2015/06/17]
16. Devji T, Guyatt G, Lytvyn L, et al. Application of Minimal Important Differences in Degenerative Knee Disease Outcomes: A Systematic Review and Case Study to Inform BMJ Rapid Recommendations. *BMJ (Submitted for publication)* 2016
17. Thorlund K, Walter SD, Johnston BC, et al. Pooling health-related quality of life outcomes in meta-analysis-a tutorial and review of methods for enhancing interpretability. *Research synthesis methods* 2011;2(3):188-203. doi: 10.1002/jrsm.46 [published Online First: 2011/09/01]

18. Juhl C, Lund H, Roos EM, et al. A hierarchy of patient-reported outcomes for meta-analysis of knee osteoarthritis trials: empirical evidence from a survey of high impact journals. *Arthritis* 2012;2012:136245. doi: 10.1155/2012/136245 [published Online First: 2012/07/14]
19. Tikkinen KA, Agarwal A, Craigie S, et al. Systematic reviews of observational studies of risk of thrombosis and bleeding in urological surgery (ROTBUS): introduction and methodology. *Systematic reviews* 2014;3:150. doi: 10.1186/2046-4053-3-150 [published Online First: 2014/12/30]
20. Wan X, Wang W, Liu J, et al. Estimating the sample mean and standard deviation from the sample size, median, range and/or interquartile range. *BMC medical research methodology* 2014;14:135. doi: 10.1186/1471-2288-14-135 [published Online First: 2014/12/20]
21. Hartung J, Knapp G. On tests of the overall treatment effect in meta-analysis with normally distributed responses. *Statistics in medicine* 2001;20(12):1771-82. doi: 10.1002/sim.791 [published Online First: 2001/06/15]
22. Sidik K, Jonkman JN. A simple confidence interval for meta-analysis. *Statistics in medicine* 2002;21(21):3153-9. doi: 10.1002/sim.1262 [published Online First: 2002/10/11]
23. Stijnen T, Hamza TH, Ozdemir P. Random effects meta-analysis of event outcome in the framework of the generalized linear mixed model with applications in sparse data. *Statistics in medicine* 2010;29(29):3046-67. doi: 10.1002/sim.4040 [published Online First: 2010/09/10]
24. R: A language and environment for statistical computing [program]. Vienna, Austria: R Foundation for Statistical Computing, 2016.
25. Guyatt GH, Oxman AD, Vist GE, et al. GRADE: an emerging consensus on rating quality of evidence and strength of recommendations. *BMJ (Clinical research ed)* 2008;336(7650):924-6. doi: 10.1136/bmj.39489.470347.AD [published Online First: 2008/04/26]
26. Guyatt GH, Oxman AD, Kunz R, et al. GRADE guidelines: 7. Rating the quality of evidence--inconsistency. *Journal of clinical epidemiology* 2011;64(12):1294-302. doi: 10.1016/j.jclinepi.2011.03.017 [published Online First: 2011/08/02]
27. Guyatt GH, Oxman AD, Kunz R, et al. GRADE guidelines 6. Rating the quality of evidence--imprecision. *Journal of clinical epidemiology* 2011;64(12):1283-93. doi: 10.1016/j.jclinepi.2011.01.012 [published Online First: 2011/08/16]
28. Guyatt GH, Oxman AD, Kunz R, et al. GRADE guidelines: 8. Rating the quality of evidence--indirectness. *Journal of clinical epidemiology* 2011;64(12):1303-10. doi: 10.1016/j.jclinepi.2011.04.014 [published Online First: 2011/08/02]
29. Guyatt GH, Oxman AD, Montori V, et al. GRADE guidelines: 5. Rating the quality of evidence--publication bias. *Journal of clinical epidemiology* 2011;64(12):1277-82. doi: 10.1016/j.jclinepi.2011.01.011 [published Online First: 2011/08/02]
30. GH G, JW B. Modification of Cochrane Tool to assess risk of bias in randomized trials [Available from: <http://distillercer.com/resources/2016>].
31. Slim K, Nini E, Forestier D, et al. Methodological index for non-randomized studies (minors): development and validation of a new instrument. *ANZ journal of surgery* 2003;73(9):712-6. [published Online First: 2003/09/06]
32. Siemieniuk RA, Harris IA, Agoritsas T, et al. Arthroscopic surgery for degenerative knee disease: a clinical practice guideline. *Bmj* 2016
33. Guyatt G, Oxman AD, Akl EA, et al. GRADE guidelines: 1. Introduction-GRADE evidence profiles and summary of findings tables. *Journal of clinical epidemiology* 2011;64(4):383-94. doi: 10.1016/j.jclinepi.2010.04.026 [published Online First: 2011/01/05]
34. Vandvik PO, Brandt L, Alonso-Coello P, et al. Creating clinical practice guidelines we can trust, use, and share: a new era is imminent. *Chest* 2013;144(2):381-9. doi: 10.1378/chest.13-0746 [published Online First: 2013/08/07]
35. Chang RW, Falconer J, Stulberg SD, et al. A randomized, controlled trial of arthroscopic surgery versus closed-needle joint lavage for patients with osteoarthritis of the knee. *Arthritis and rheumatism* 1993;36(3):289-96. [published Online First: 1993/03/01]
36. Gauffin H, Tagesson S, Meunier A, et al. Knee arthroscopic surgery is beneficial to middle-aged patients with meniscal symptoms: a prospective, randomised, single-blinded study. *Osteoarthritis and cartilage / OARS, Osteoarthritis Research Society* 2014;22(11):1808-16. doi: 10.1016/j.joca.2014.07.017 [published Online First: 2014/08/03]

- 1  
2  
3  
4  
5  
6  
7  
8  
9  
10  
11  
12  
13  
14  
15  
16  
17  
18  
19  
20  
21  
22  
23  
24  
25  
26  
27  
28  
29  
30  
31  
32  
33  
34  
35  
36  
37  
38  
39  
40  
41  
42  
43  
44  
45  
46  
47  
48  
49  
50  
51  
52  
53  
54  
55  
56  
57  
58  
59  
60
37. Herrlin S, Hallander M, Wange P, et al. Arthroscopic or conservative treatment of degenerative medial meniscal tears: a prospective randomised trial. *Knee surgery, sports traumatology, arthroscopy : official journal of the ESSKA* 2007;15(4):393-401. doi: 10.1007/s00167-006-0243-2 [published Online First: 2007/01/12]
  38. Herrlin SV, Wange PO, Lapidus G, et al. Is arthroscopic surgery beneficial in treating non-traumatic, degenerative medial meniscal tears? A five year follow-up. *Knee surgery, sports traumatology, arthroscopy : official journal of the ESSKA* 2013;21(2):358-64. doi: 10.1007/s00167-012-1960-3 [published Online First: 2012/03/23]
  39. Katz JN, Brophy RH, Chaisson CE, et al. Surgery versus physical therapy for a meniscal tear and osteoarthritis. *The New England journal of medicine* 2013;368(18):1675-84. doi: 10.1056/NEJMoa1301408 [published Online First: 2013/03/20]
  40. Kirkley A, Birmingham TB, Litchfield RB, et al. A randomized trial of arthroscopic surgery for osteoarthritis of the knee. *The New England journal of medicine* 2008;359(11):1097-107. doi: 10.1056/NEJMoa0708333 [published Online First: 2008/09/12]
  41. Moseley JB, O'Malley K, Petersen NJ, et al. A controlled trial of arthroscopic surgery for osteoarthritis of the knee. *The New England journal of medicine* 2002;347(2):81-8. doi: 10.1056/NEJMoa013259 [published Online First: 2002/07/12]
  42. Osteras H, Osteras B, Torstensen TA. Medical exercise therapy, and not arthroscopic surgery, resulted in decreased depression and anxiety in patients with degenerative meniscus injury. *Journal of bodywork and movement therapies* 2012;16(4):456-63. doi: 10.1016/j.jbmt.2012.04.003 [published Online First: 2012/10/06]
  43. Saeed K, Khan SA, Ahmed I. Efficacy of intra articular hyaluronic acid versus arthroscopic debridement in terms of improvement in pain score in Kellgran -Lawrence Grading II & III osteoarthritis of knee joint. *Pakistan Journal of Medical and Health Sciences* 2015;9(3):1011-15.
  44. Sihvonen R, Paavola M, Malmivaara A, et al. Arthroscopic partial meniscectomy versus sham surgery for a degenerative meniscal tear. *N Engl J Med* 2013;369(26):2515-24. doi: 10.1056/NEJMoa1305189
  45. Stensrud S, Risberg MA, Roos EM. Effect of exercise therapy compared with arthroscopic surgery on knee muscle strength and functional performance in middle-aged patients with degenerative meniscus tears: a 3-mo follow-up of a randomized controlled trial. *American journal of physical medicine & rehabilitation / Association of Academic Physiatrists* 2015;94(6):460-73. doi: <http://dx.doi.org/10.1097/PHM.0000000000000209>
  46. Vermesan D, Prejbeanu R, Laitin S, et al. Arthroscopic debridement compared to intra-articular steroids in treating degenerative medial meniscal tears. *European review for medical and pharmacological sciences* 2013;17(23):3192-6. [published Online First: 2013/12/18]
  47. Yim JH, Seon JK, Song EK, et al. A comparative study of meniscectomy and nonoperative treatment for degenerative horizontal tears of the medial meniscus. *The American journal of sports medicine* 2013;41(7):1565-70. doi: 10.1177/0363546513488518 [published Online First: 2013/05/25]
  48. Basques BA, Gardner EC, Varthi AG, et al. Risk factors for short-term adverse events and readmission after arthroscopic meniscectomy: does age matter? *The American journal of sports medicine* 2015;43(1):169-75. doi: 10.1177/0363546514551923 [published Online First: 2014/10/09]
  49. Bohensky MA, Ademi Z, deSteiger R, et al. Quantifying the excess cost and resource utilisation for patients with complications associated with elective knee arthroscopy: a retrospective cohort study. *The Knee* 2014;21(2):491-6. doi: 10.1016/j.knee.2013.11.009 [published Online First: 2013/12/18]
  50. Cancienne JM, Gwathmey FW, Werner BC. Intraoperative Corticosteroid Injection at the Time of Knee Arthroscopy Is Associated With Increased Postoperative Infection Rates in a Large Medicare Population. *Arthroscopy : the journal of arthroscopic & related surgery : official publication of the Arthroscopy Association of North America and the International Arthroscopy Association* 2016;32(1):90-5. doi: 10.1016/j.arthro.2015.09.003 [published Online First: 2015/11/11]
  51. Hame SL, Nguyen V, Ellerman J, et al. Complications of arthroscopic meniscectomy in the older population. *The American journal of sports medicine* 2012;40(6):1402-5. doi: 10.1177/0363546512443043 [published Online First: 2012/04/13]
  52. Hetsroni I, Lyman S, Do H, et al. Symptomatic pulmonary embolism after outpatient arthroscopic procedures of the knee: the incidence and risk factors in 418,323 arthroscopies. *The Journal of bone and joint surgery British volume* 2011;93(1):47-51. doi: 10.1302/0301-620x.93b1.25498 [published Online First: 2011/01/05]

- 1  
2  
3 53. Hoppener MR, Ettema HB, Henny CP, et al. Low incidence of deep vein thrombosis after knee arthroscopy  
4 without thromboprophylaxis: a prospective cohort study of 335 patients. *Acta orthopaedica*  
5 2006;77(5):767-71. doi: 10.1080/17453670610012962 [published Online First: 2006/10/28]  
6  
7 54. Jameson SS, Dowen D, James P, et al. The burden of arthroscopy of the knee: a contemporary analysis of data  
8 from the English NHS. *The Journal of bone and joint surgery British volume* 2011;93(10):1327-33. doi:  
9 10.1302/0301-620x.93b10.27078 [published Online First: 2011/10/05]  
10  
11 55. Krych AJ, Sousa PL, Morgan JA, et al. Incidence and Risk Factor Analysis of Symptomatic Venous  
12 Thromboembolism After Knee Arthroscopy. *Arthroscopy : the journal of arthroscopic & related surgery : official publication of the Arthroscopy Association of North America and the International Arthroscopy Association* 2015;31(11):2112-8. doi: 10.1016/j.arthro.2015.04.091 [published Online First: 2015/06/25]  
13  
14 56. Maletis GB, Inacio MC, Reynolds S, et al. Incidence of symptomatic venous thromboembolism after elective  
15 knee arthroscopy. *The Journal of bone and joint surgery American volume* 2012;94(8):714-20. doi:  
16 10.2106/jbjs.j.01759 [published Online First: 2012/04/21]  
17  
18 57. Wai EK, Kreder HJ, Williams JI. Arthroscopic debridement of the knee for osteoarthritis in patients fifty years  
19 of age or older: utilization and outcomes in the Province of Ontario. *The Journal of bone and joint surgery American volume* 2002;84-a(1):17-22. [published Online First: 2002/01/17]  
20  
21 58. Yacub JN, Rice JB, Dillingham TR. Nerve injury in patients after hip and knee arthroplasties and knee  
22 arthroscopy. *Am J Phys Med Rehabil* 2009;88(8):635-41; quiz 42-4, 91. doi:  
23 10.1097/PHM.0b013e3181ae0c9d [published Online First: 2009/07/22]  
24  
25 59. Yeranorian MG, Petrigliano FA, Terrell RD, et al. Incidence of postoperative infections requiring reoperation  
26 after arthroscopic knee surgery. *Arthroscopy : the journal of arthroscopic & related surgery : official publication of the Arthroscopy Association of North America and the International Arthroscopy Association* 2013;29(8):1355-61. doi: 10.1016/j.arthro.2013.05.007 [published Online First: 2013/08/03]  
27  
28 60. Sihvonen R, Paavola M, Malmivaara A, et al. Arthroscopic partial meniscectomy versus sham surgery for a  
29 degenerative meniscal tear. *The New England journal of medicine* 2013;369(26):2515-24. doi:  
30 10.1056/NEJMoa1305189 [published Online First: 2013/12/27]  
31  
32 61. Mills KA, Naylor JM, Eyles JP, et al. Examining the Minimal Important Difference of Patient-reported Outcome  
33 Measures for Individuals with Knee Osteoarthritis: A Model Using the Knee Injury and Osteoarthritis  
34 Outcome Score. *The Journal of rheumatology* 2016;43(2):395-404. doi: 10.3899/jrheum.150398 [published  
35 Online First: 2016/01/17]  
36  
37 62. Walters SJ, Brazier JE. Comparison of the minimally important difference for two health state utility measures:  
38 EQ-5D and SF-6D. *Quality of Life Research* 2005;14(6):1523-32.  
39  
40 63. Balshem H, Helfand M, Schunemann HJ, et al. GRADE guidelines: 3. Rating the quality of evidence. *Journal of clinical epidemiology* 2011;64(4):401-6. doi: 10.1016/j.jclinepi.2010.07.015 [published Online First:  
41 2011/01/07]  
42  
43  
44  
45  
46  
47  
48  
49  
50  
51  
52  
53  
54  
55  
56  
57  
58  
59  
60

1  
2  
3 **FIGURES LEGENDS**  
4  
5

6 Figure 1: Study selection process  
7  
8  
9  
10  
11  
12  
13  
14  
15  
16  
17  
18  
19  
20  
21  
22  
23  
24  
25  
26  
27  
28  
29  
30  
31  
32  
33  
34  
35  
36  
37  
38  
39  
40  
41  
42  
43  
44  
45  
46  
47  
48  
49  
50  
51  
52  
53  
54  
55  
56  
57  
58  
59  
60

For peer review only

1  
2  
3  
4  
5  
6  
7  
8  
9  
10  
11  
12  
13  
14  
15  
16  
17  
18  
19  
20  
21  
22  
23  
24  
25  
26  
27  
28  
29  
30  
31  
32  
33  
34  
35  
36  
37  
38  
39  
40  
41  
42  
43  
44  
45  
46  
47  
48  
49  
50  
51  
52  
53  
54  
55  
56  
57  
58  
59  
60



Study selection process  
Figure 1  
346x306mm (72 x 72 DPI)

only

## Appendix 1: Search strategies

**Update of effects and complications of knee arthroscopy****MEDLINE (Pubmed)**

1. (((("Menisci, Tibial/surgery"[MeSH Major Topic]) OR ("Menisci, Tibial/injuries"[MeSH Major Topic]) OR ("Degenerative meniscal tear"[Title/Abstract]) OR ("Arthroscopic lavage"[Title/Abstract]) OR ("Arthroscopic debridement"[Title/Abstract]) OR ("arthroscopic meniscectomy"[Title/Abstract]) OR ((arthroscopy[Title/Abstract] AND knee[Title/Abstract])))
2. (("Randomized"[Title/Abstract]) OR ("Randomized controlled trial"[Publication Type]) OR ("randomized controlled trials as topic"[MeSH Major Topic]) OR ("Random allocation"[MeSH Major Topic]) OR ("Control group"[Title/Abstract]) OR ("Control groups"[MeSH Terms]) OR ("Cross-over studies"[Title/Abstract]) OR ("Cross-over study"[Title/Abstract]))
3. (((("Menisci, Tibial/surgery"[MeSH Major Topic]) OR ("Menisci, Tibial/injuries"[MeSH Major Topic]) OR ("Degenerative meniscal tear"[Title/Abstract]) OR ("Arthroscopic lavage"[Title/Abstract]) OR ("Arthroscopic debridement"[Title/Abstract]) OR ("arthroscopic meniscectomy"[Title/Abstract]) OR ((arthroscopy[Title/Abstract] AND knee[Title/Abstract])))
4. (("adverse events"[Title/Abstract]) OR ("side effects"[Title/Abstract]) OR ("adverse effects"[Title/Abstract]) OR (complication\*[Title/Abstract]) OR ("adverse effects"[MeSH Subheading])))
5. 1 AND 2
6. 3 AND 4
7. 5 OR 6

**EMBASE (Ovid)**

1. Arthroscopic meniscectomy.ti,ab,kw.
2. Arthroscopic debridement.ti,ab,kw.
3. Arthroscopic lavage.ti,ab,kw.
4. Degenerative meniscal tear.ti,ab,kw.
5. knee meniscus/ or meniscus tibial.mp.
6. exp knee arthroscopy/
7. 1 or 2 or 3 or 4 or 5 or 6
8. randomized controlled trial/
9. randomized.ti,ab,kw.
10. randomised.ti,ab,kw.
11. Random allocation.mp.



1  
2  
3  
4 12. randomised.mp.  
5

6 13. "randomized controlled trial (topic)"/  
7

8  
9 14. Control group.mp.  
10

11 15. control group/  
12

13 16. crossover procedure/  
14

15 17. 8 or 9 or 10 or 11 or 12 or 13 or 14 or 15 or 16  
16

17 18. adverse events.mp.  
18

19 19. side effects.mp.  
20

21 20. adverse effects.mp.  
22

23 21. complications.mp.  
24

25 22. 18 or 19 or 20 or 21  
26

27 23. 7 and 17  
28

29 24. 7 and 22  
30

31 25. 23 or 24  
32

33 26. limit 25 to yr="2014-2016"  
34  
35  
36  
37

### 38 **Cochrane Central Register of Controlled Trials**

39  
40 #1 MeSH descriptor: [Menisci, Tibial] explode all trees and with qualifier(s): [Injuries - IN, Surgery  
41 - SU]  
42

43 #2 MeSH descriptor: [Arthroscopy] explode all trees

44 #3 MeSH descriptor: [Knee] explode all trees

45 #4 #2 and #3

46 #5 Degenerative meniscal tear:ti,ab,kw (Word variations have been searched)

47 #6 Arthroscopic lavage:ti,ab,kw (Word variations have been searched)

48 #7 Arthroscopic debridement:ti,ab,kw (Word variations have been searched)

49 #8 arthroscopic meniscectomy:ti,ab,kw (Word variations have been searched)

50 #9 #1 or #4 or #5 or #6 or #7 or #8 Publication Year from 2014 to 2016, in Trials  
51  
52

### 53 **New search of outcome nerve damage**

### 54 **Medline Pubmed** 55 56 57 58 59 60

1  
2  
3 ("Peripheral Nerve Injuries"[Mesh]) AND ("Arthroplasty, Replacement, Knee/adverse effects"[Mesh] OR  
4 "knee arthroscopy" OR ("arthroscop\*" AND "knee"))  
5  
6

7  
8 **Embase (Ovid)**  
9

- 10 1. exp nerve injury/
- 11 2. exp knee arthroscopy/
- 12 3. 1 AND 2  
13  
14  
15  
16  
17  
18  
19  
20  
21  
22  
23  
24  
25  
26  
27  
28  
29  
30  
31  
32  
33  
34  
35  
36  
37  
38  
39  
40  
41  
42  
43  
44  
45  
46  
47  
48  
49  
50  
51  
52  
53  
54  
55  
56  
57  
58  
59  
60

For peer review only

Appendix 2: Results of sensitivity analyses to assess the robustness of the difference in the proportion of patients who reach a change higher than the MID

| Outcome                    | MID (range)                                   | Risk difference (95% CI) | Risk difference when using lowest value of the range (95% CI) | Risk difference when using highest value of the range (95% CI) | Risk difference based on the standardized mean difference* (95% CI) |
|----------------------------|-----------------------------------------------|--------------------------|---------------------------------------------------------------|----------------------------------------------------------------|---------------------------------------------------------------------|
| Pain in the short term     | KOOS pain <sup>58</sup><br>12 (4; 20)         | 12.4%<br>(4.4; 20.4)     | 10.5%<br>(4.3; 16.7)                                          | 11.3%<br>(2.9; 19.7)                                           | 9%<br>(1.7; 15.7)                                                   |
|                            | WOMAC pain <sup>61</sup><br>12 (2; 30)        |                          |                                                               |                                                                |                                                                     |
| Function in the short term | KOOS ADL <sup>58</sup><br>8 (3; 9)            | 13.4%<br>(4.4; 22.3)     | 11.3%<br>(3; 19.5)                                            | 11%<br>(2; 19.9)                                               | 7.3%<br>(-0.06; 15.1)                                               |
|                            | WOMAC function <sup>61 62</sup><br>13 (3; 34) |                          |                                                               |                                                                |                                                                     |

\*This method relies on the standardized mean difference. It does not use any specific threshold to calculate the risk difference.

Appendix Figure 1: Meta-analysis of pain in the short-term (difference in change from baseline)

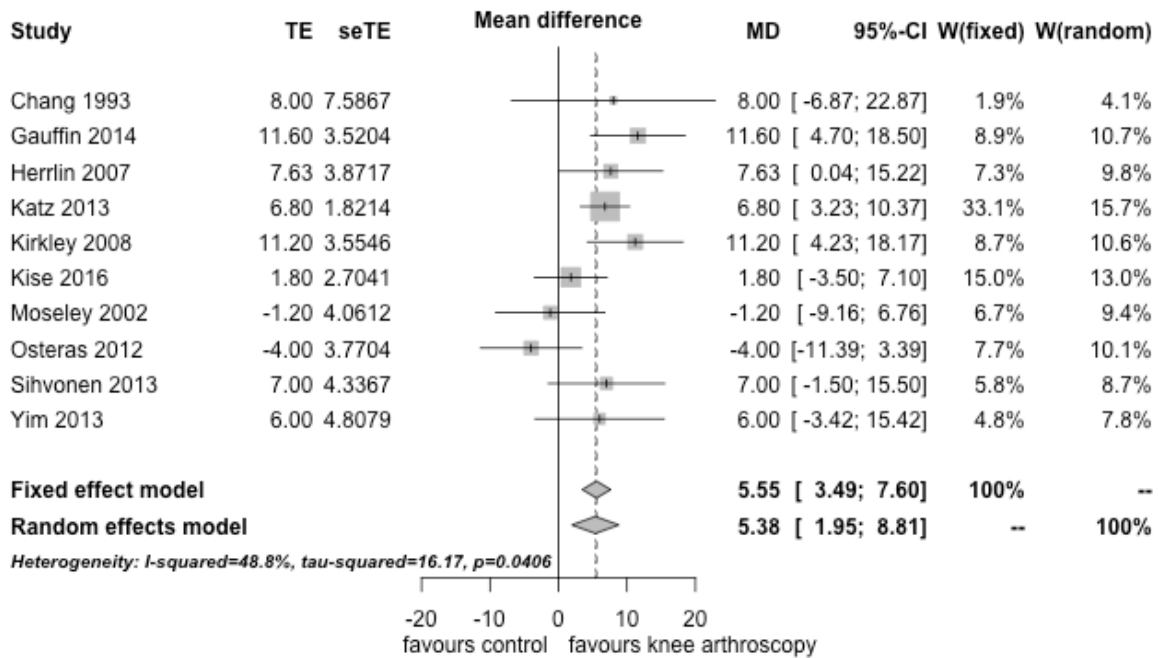

Appendix Figure 2: Meta-analysis of pain in the long-term (difference in change from baseline)

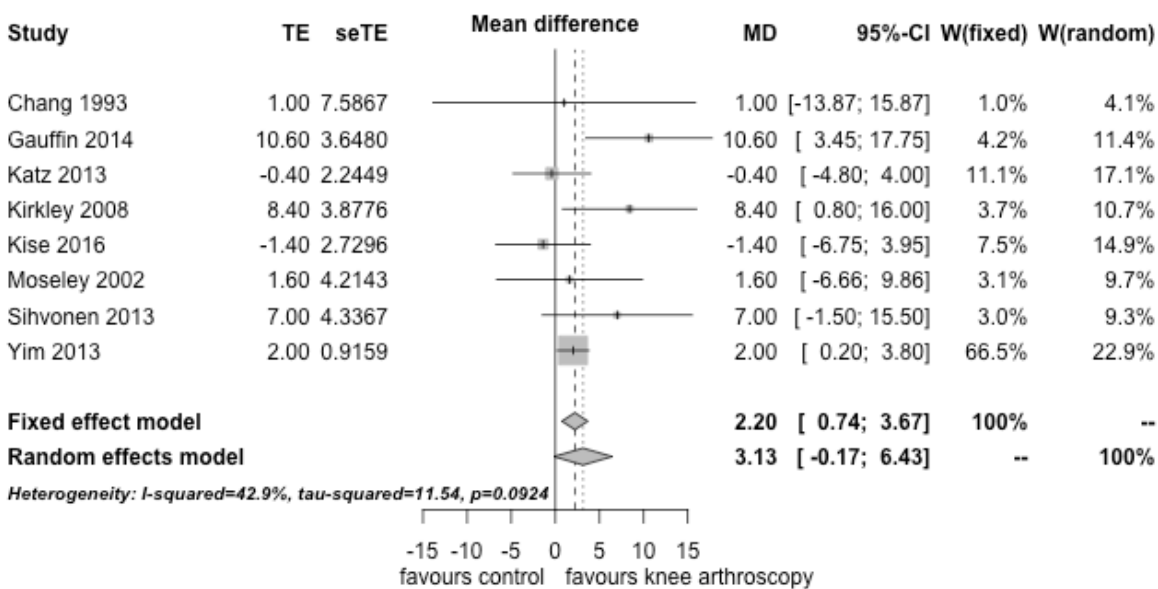

Appendix Figure 3: Meta-analysis of function in the short-term (difference in change from baseline)

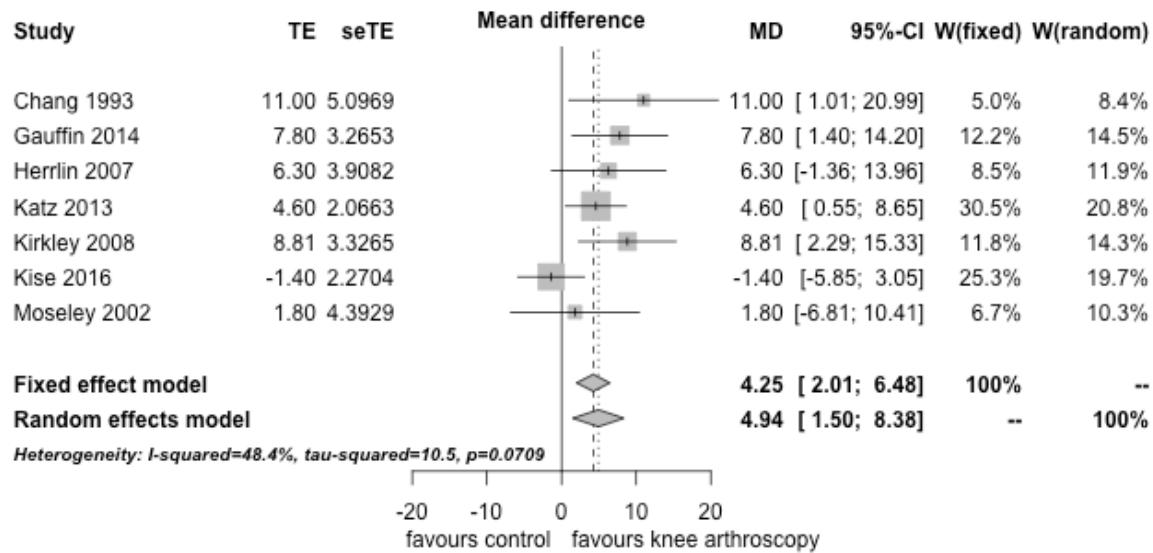

Appendix Figure 4: Meta-analysis of function in the long-term (difference in change from baseline)

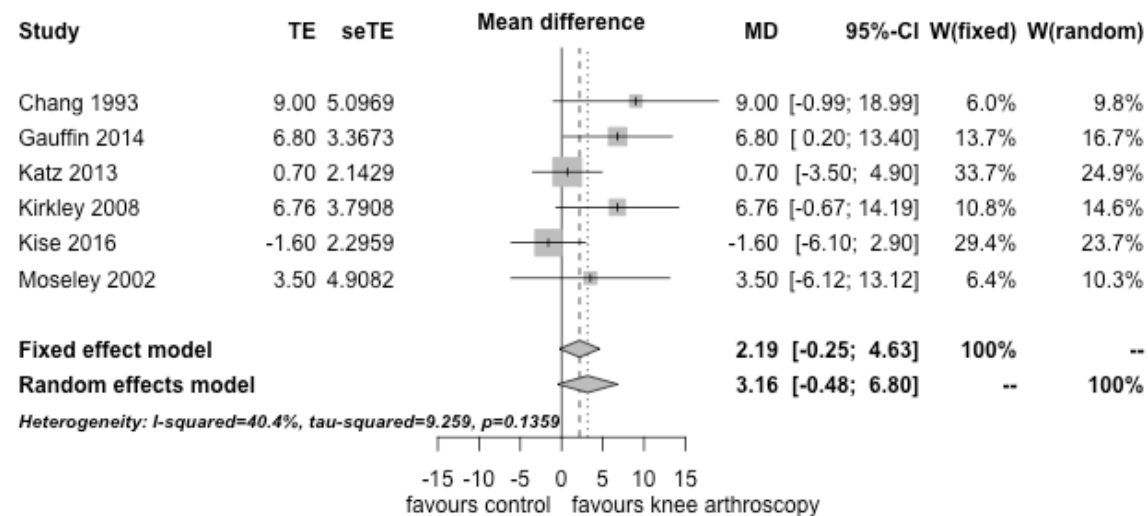

Appendix Figure 5: Subgroup analysis of pain in the short term (difference on change from baseline) according to blinding of the studies. P value of test for subgroup effect= 0.48

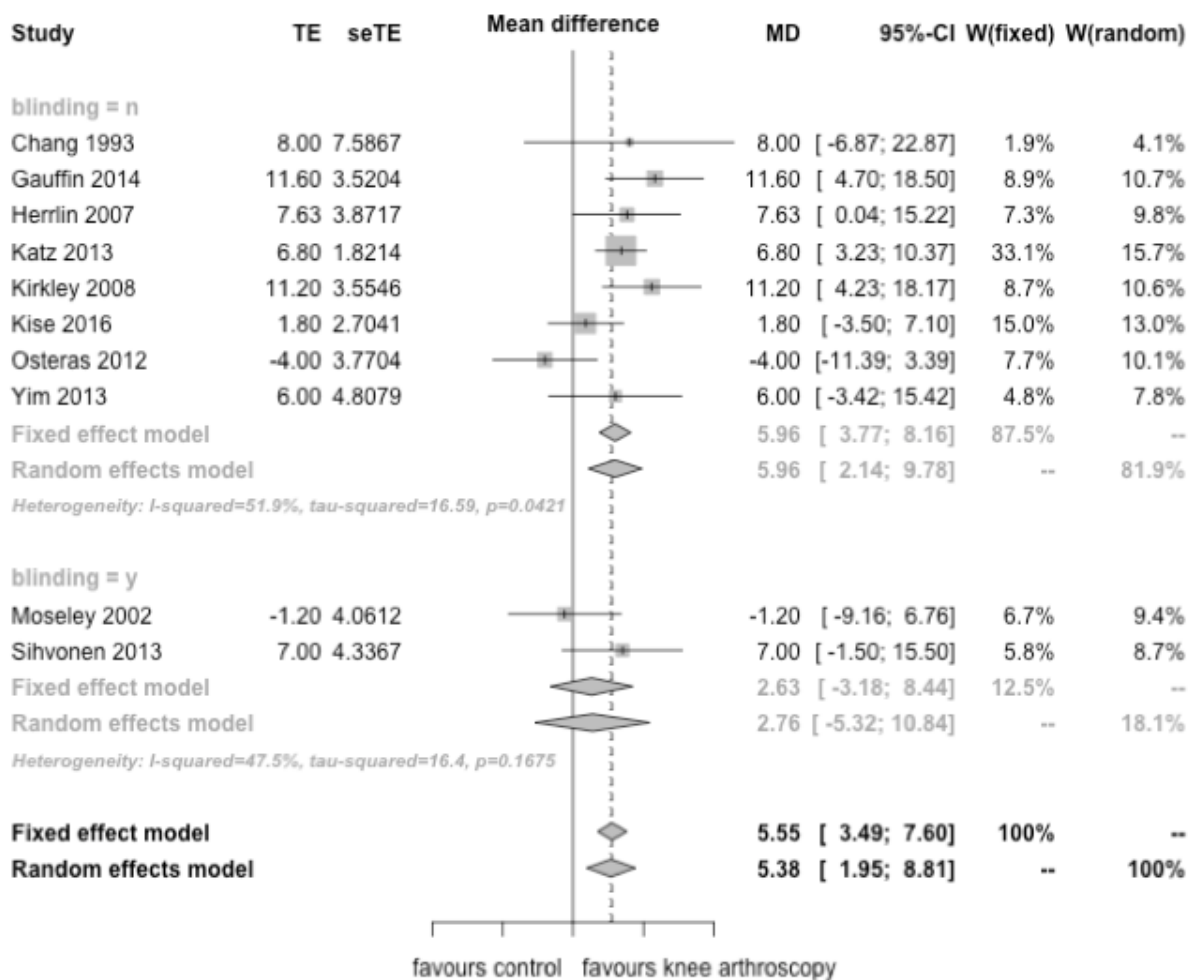

only

Appendix Figure 6: Subgroup analysis of pain in the short term (difference on change from baseline) according to percentage of patients with radiographic knee osteoarthritis (>50% patients). P value of test for subgroup effect= 0.88

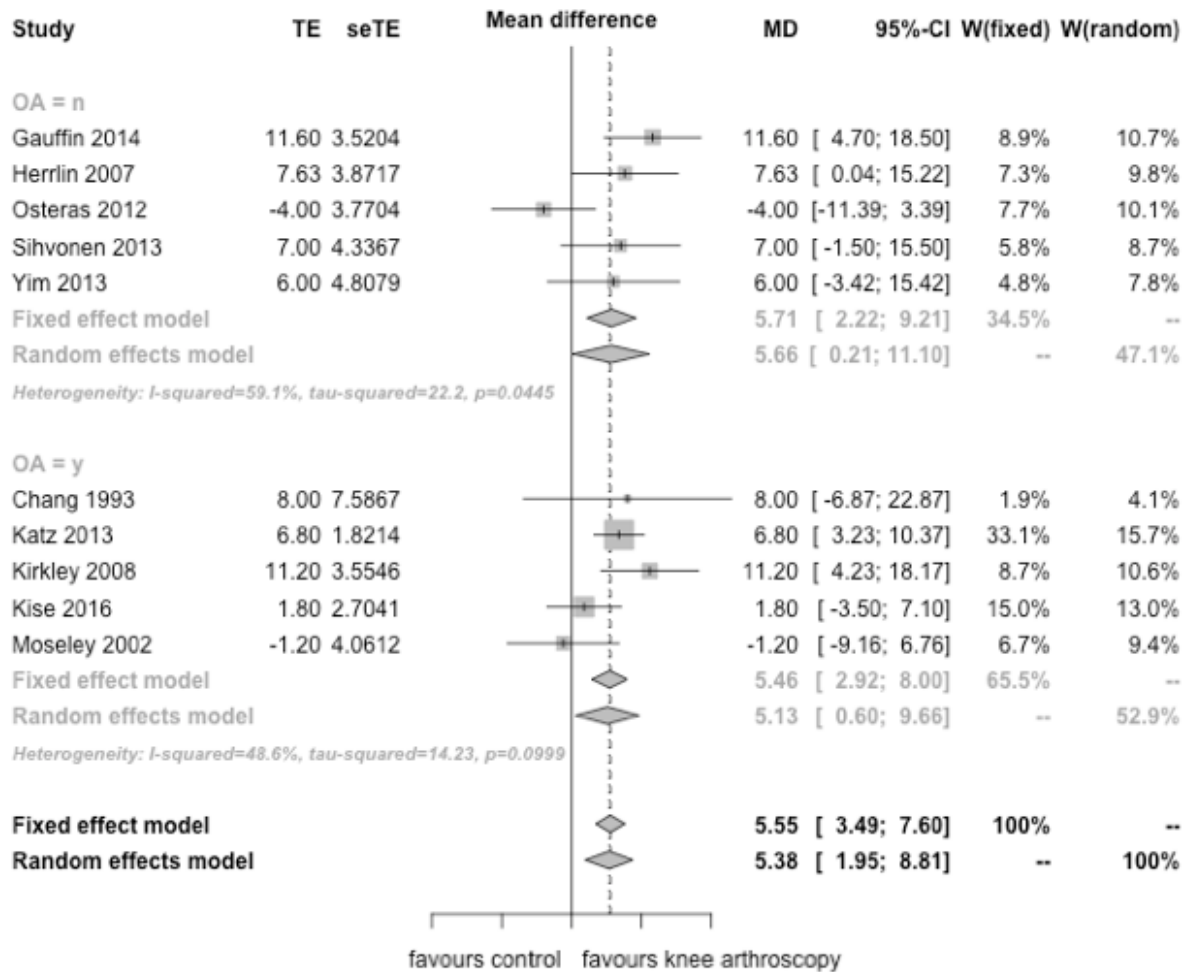

Appendix Figure 7: Subgroup analysis of pain in the long term (difference on change from baseline) according to blinding of the studies. P value of test for subgroup effect= 0.75

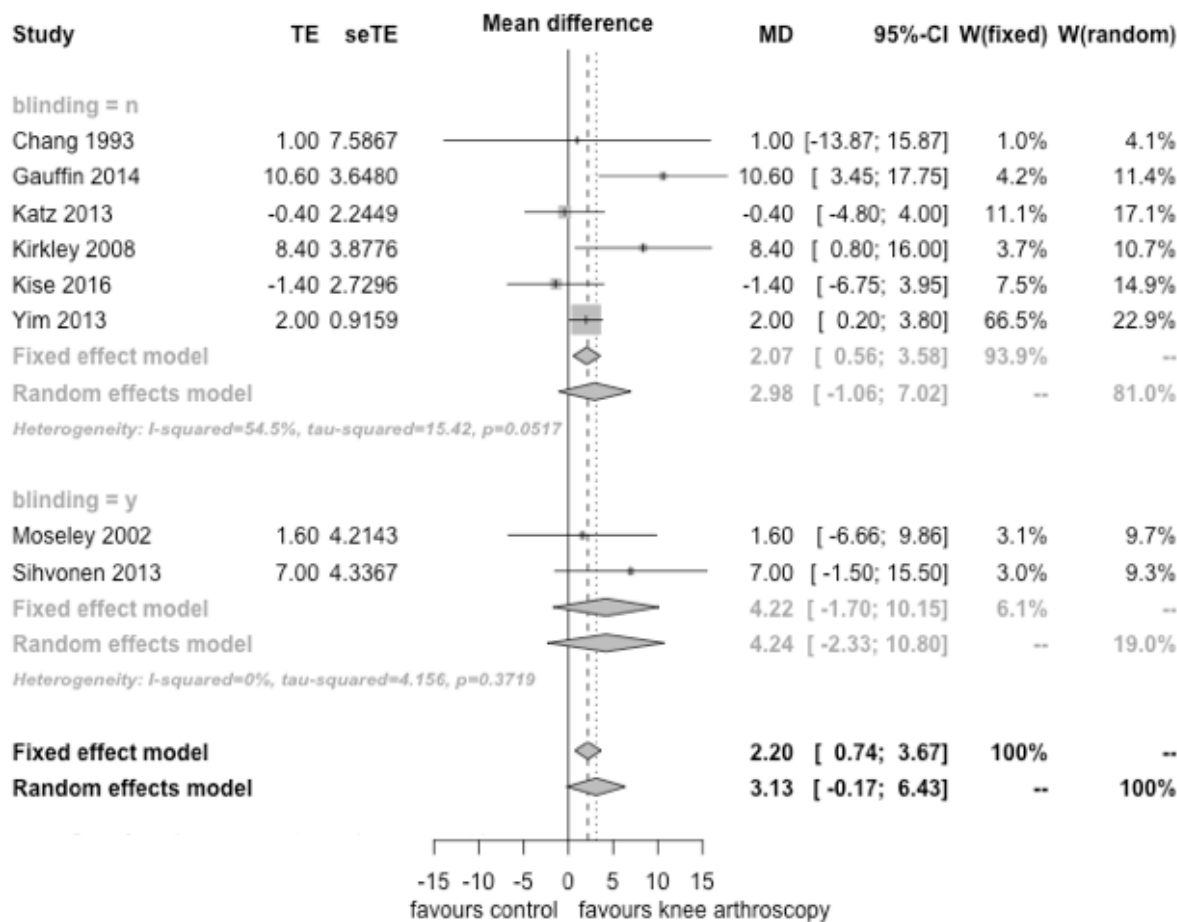



Appendix Figure 8: Subgroup analysis of pain in the long term (difference on change from baseline) according to percentage of patients with radiographic knee osteoarthritis (>50% patients). P value of test for subgroup effect= 0.22

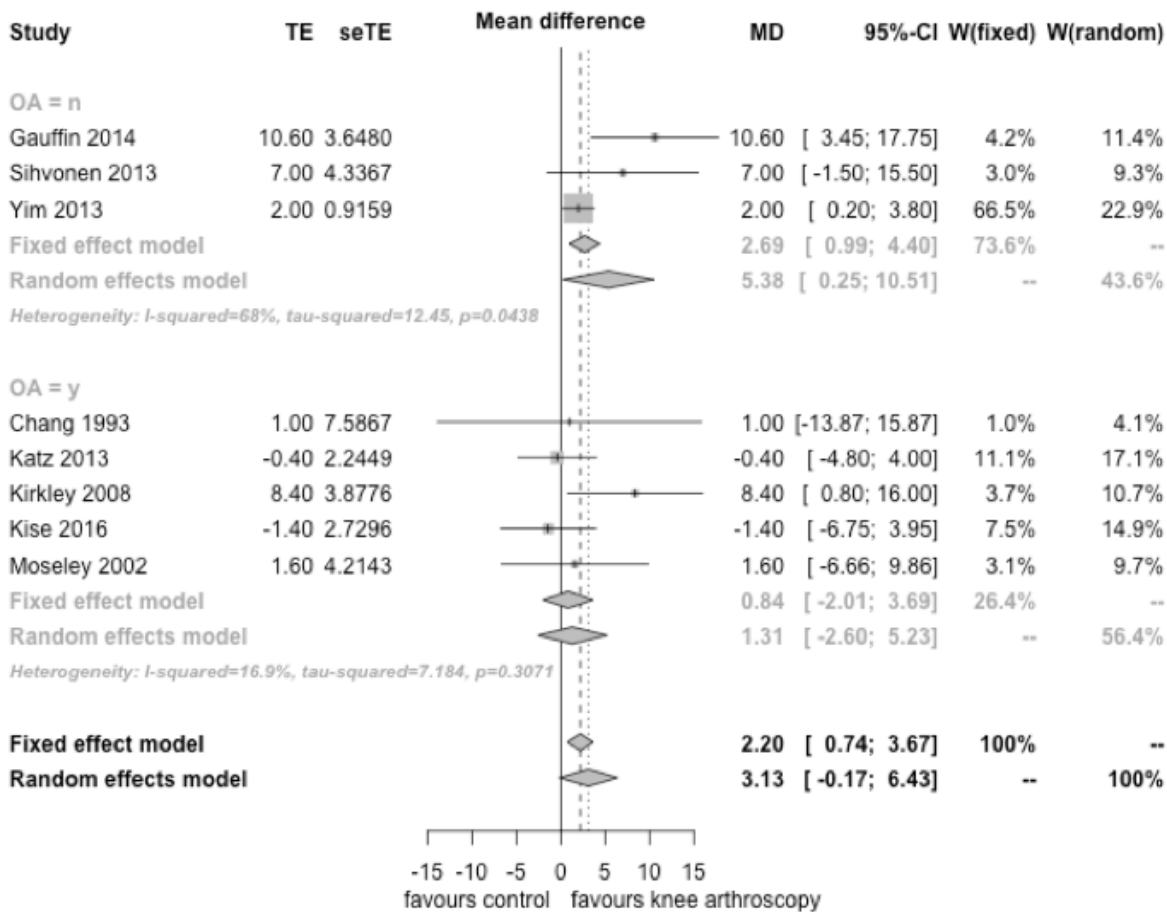

only

Appendix Figure 9: Subgroup analysis of function in the short term (difference on change from baseline) according to blinding of the studies. P value of test for subgroup effect= 0.46

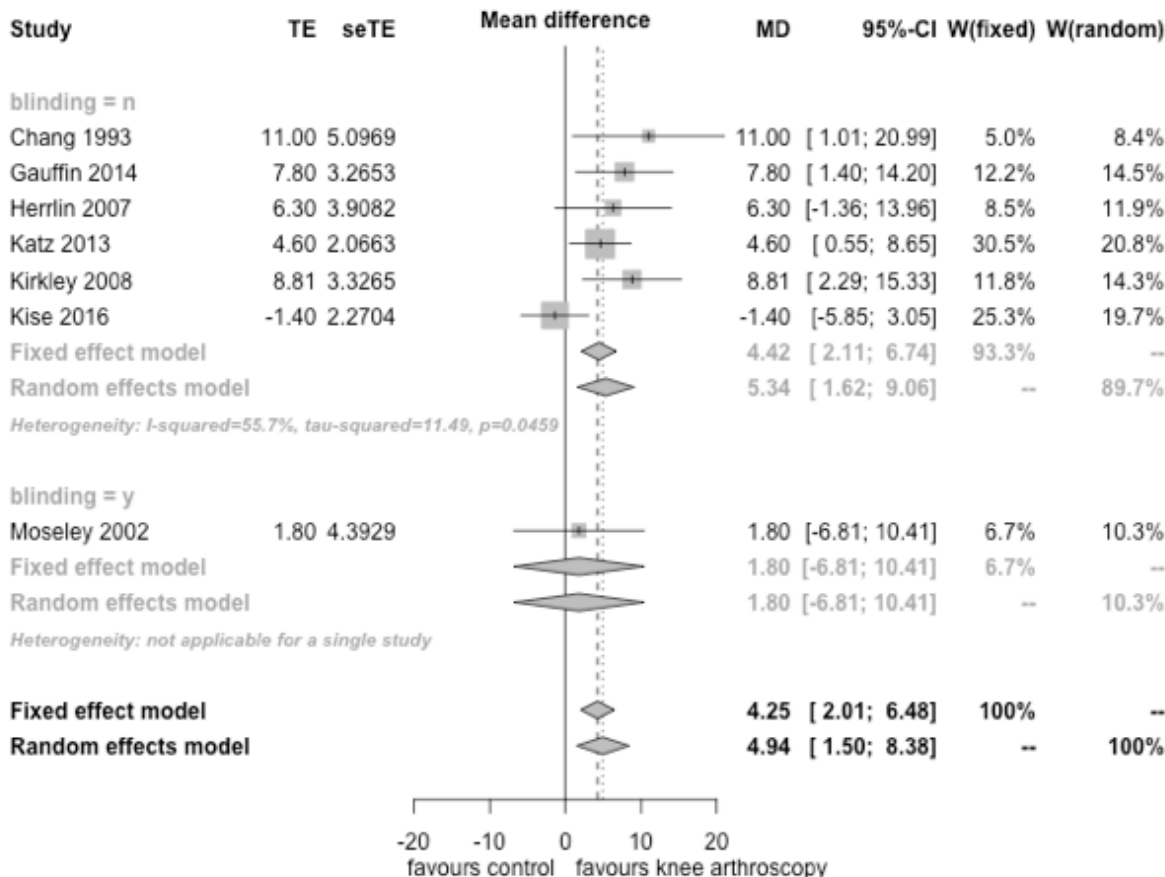

w only

Appendix Figure 10: Subgroup analysis of function in the short term (difference on change from baseline) according to percentage of patients with radiographic knee osteoarthritis (>50% patients). P value of test for subgroup effect= 0.40

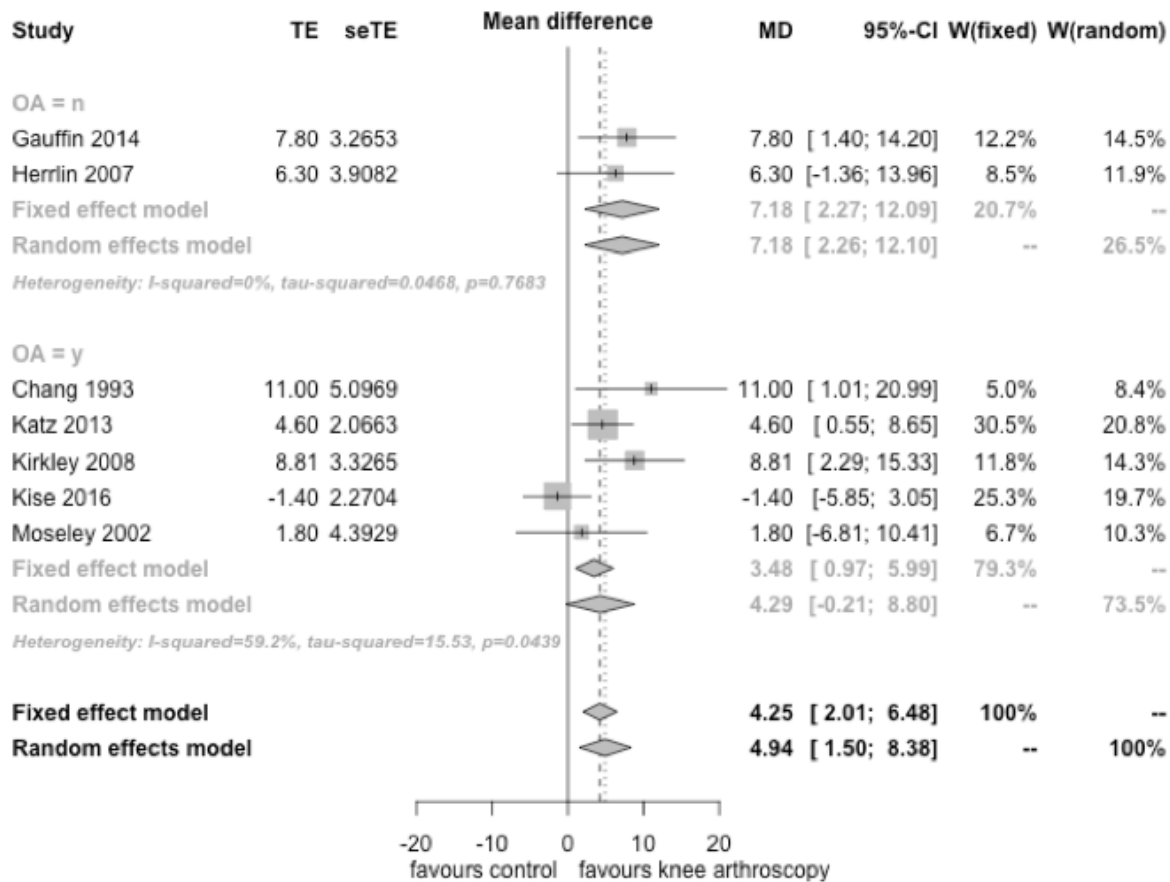

For peer review only

Appendix Figure 11: Subgroup analysis of function in the long term (difference on change from baseline) according to blinding of the studies. P value of test for subgroup effect= 0.97

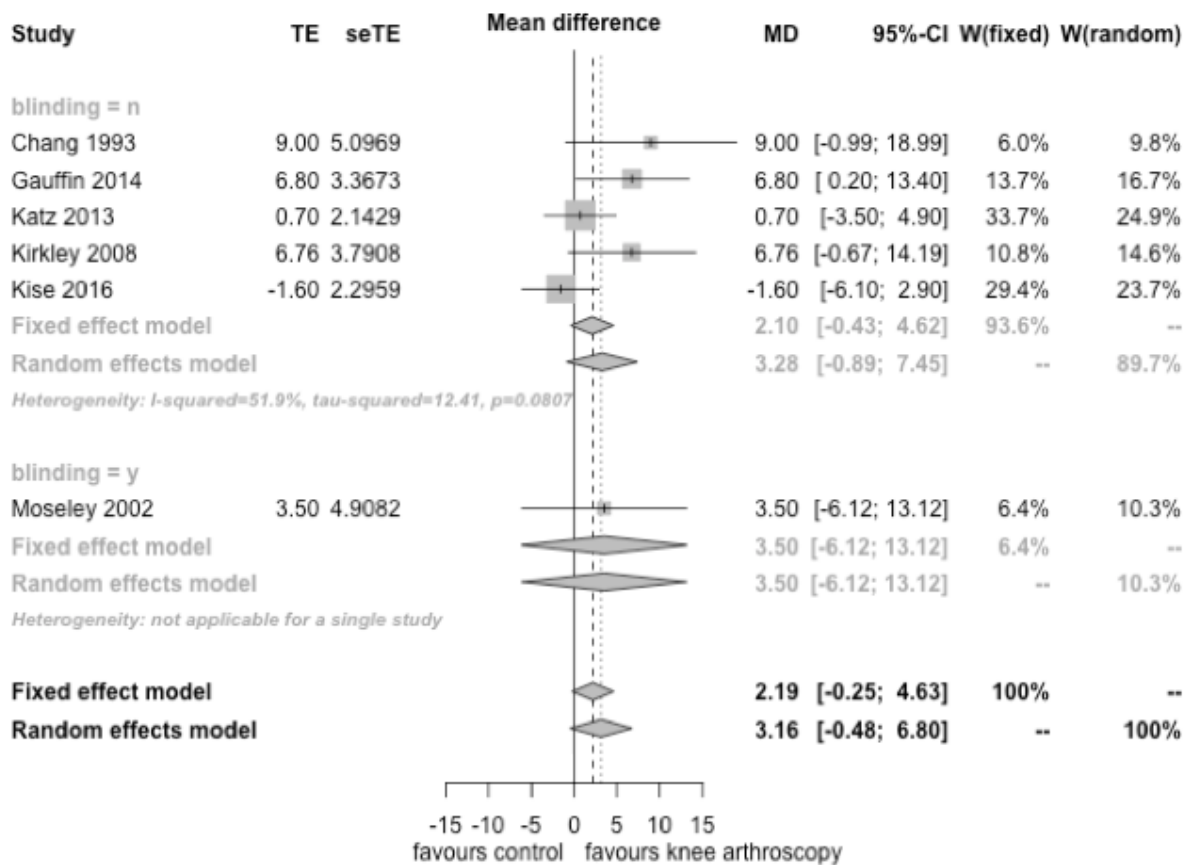

View Only

Appendix Figure 12: Subgroup analysis of function in the long term (difference on change from baseline) according to percentage of patients with radiographic knee osteoarthritis (>50% patients). P value of test for subgroup effect= 0.27

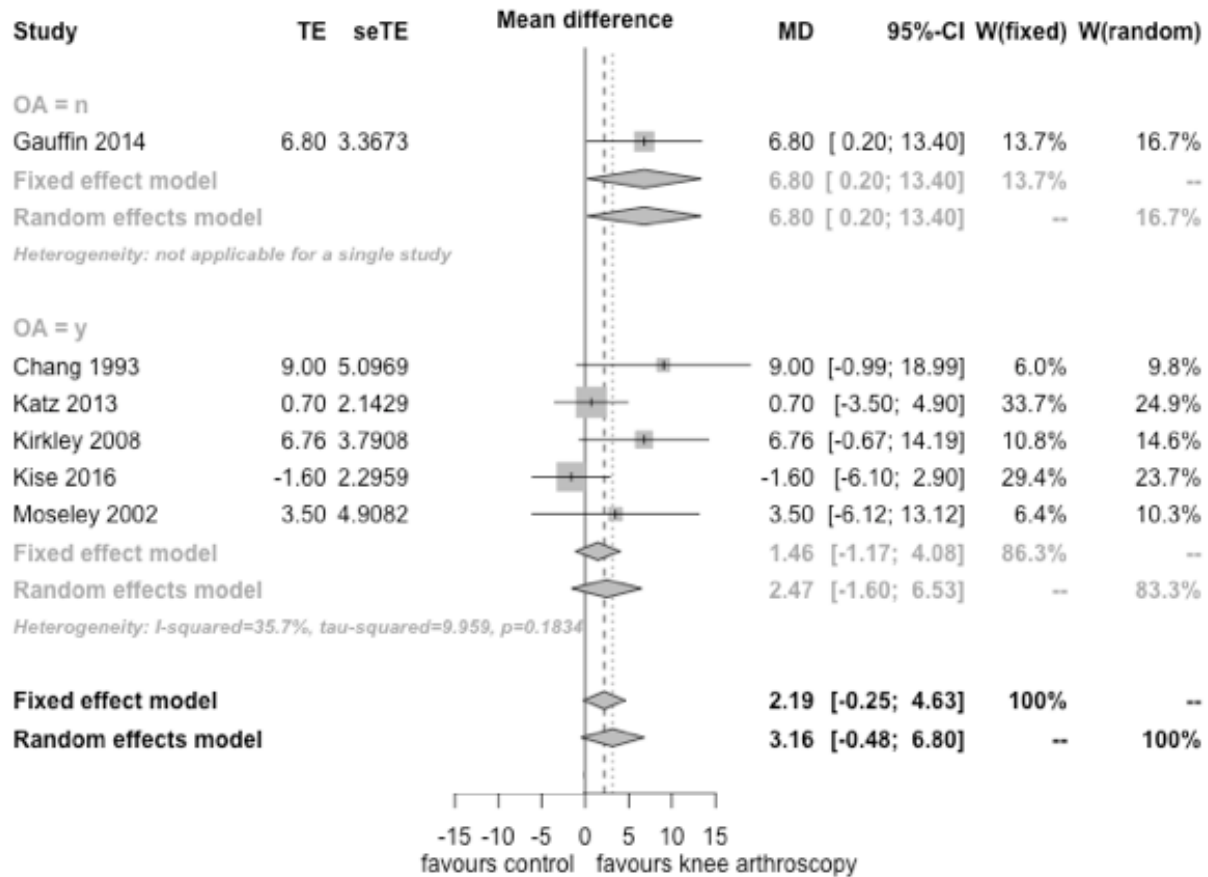

Appendix Figure 13: Meta-analysis of Quality of life in the long-term (difference in change from baseline)

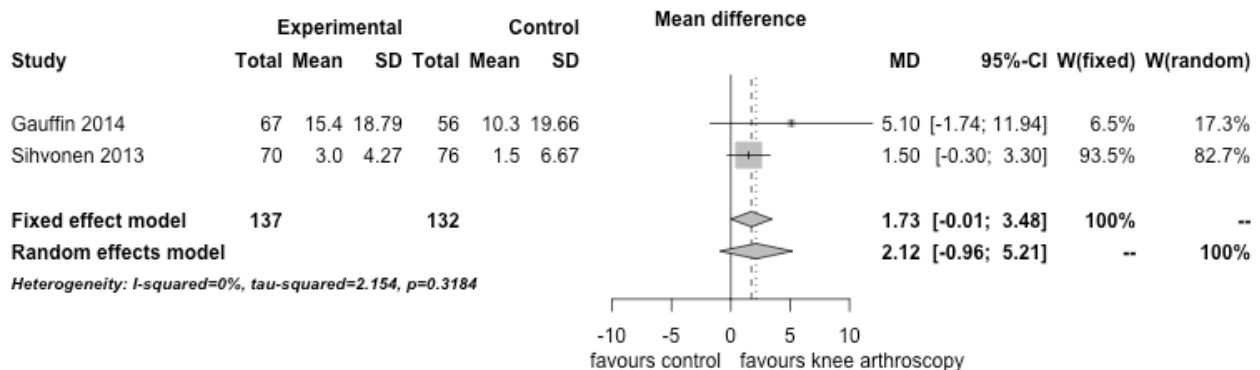

Appendix Figure 14: Meta-analysis of Knee Replacement

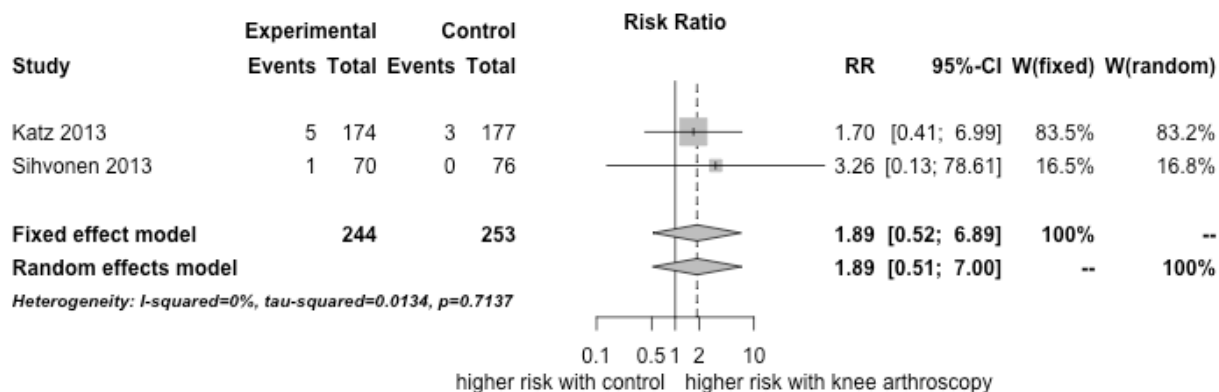

peer review only

Appendix Figure 15: Risk of bias of studies included in the systematic review of effects of knee arthroscopy

|                    | Random sequence generation (selection bias) | Allocation concealment (selection bias) | Blinding of participants (performance and detection bias) | Incomplete outcome data (attrition bias) | Selective reporting (reporting bias) | Other bias |
|--------------------|---------------------------------------------|-----------------------------------------|-----------------------------------------------------------|------------------------------------------|--------------------------------------|------------|
| Chang 1993         | +                                           | -                                       | -                                                         | +                                        | +                                    | +          |
| Gauffin 2014       | +                                           | +                                       | -                                                         | -                                        | +                                    | +          |
| Herrlin 2007, 2013 | +                                           | -                                       | -                                                         | -                                        | +                                    | -          |
| Katz 2013          | +                                           | +                                       | -                                                         | +                                        | +                                    | +          |
| Kirkley 2008       | +                                           | +                                       | -                                                         | -                                        | +                                    | +          |
| Kise 2016          | +                                           | +                                       | -                                                         | +                                        | +                                    | +          |
| Moseley 2002       | +                                           | +                                       | +                                                         | +                                        | +                                    | +          |
| Osteras 2012       | +                                           | +                                       | -                                                         | +                                        | +                                    | +          |
| Saeed 2015         | +                                           | -                                       | -                                                         | +                                        | -                                    | +          |
| Sihvonen 2013      | +                                           | +                                       | +                                                         | +                                        | +                                    | +          |
| Stensrud 2015      | +                                           | +                                       | -                                                         | -                                        | -                                    | +          |
| Vermesan 2013      | +                                           | -                                       | -                                                         | +                                        | -                                    | +          |
| Yim 2013           | +                                           | +                                       | -                                                         | +                                        | +                                    | +          |

Appendix Figure 16: Funnel plots for publication bias assessments of effects of knee arthroscopy

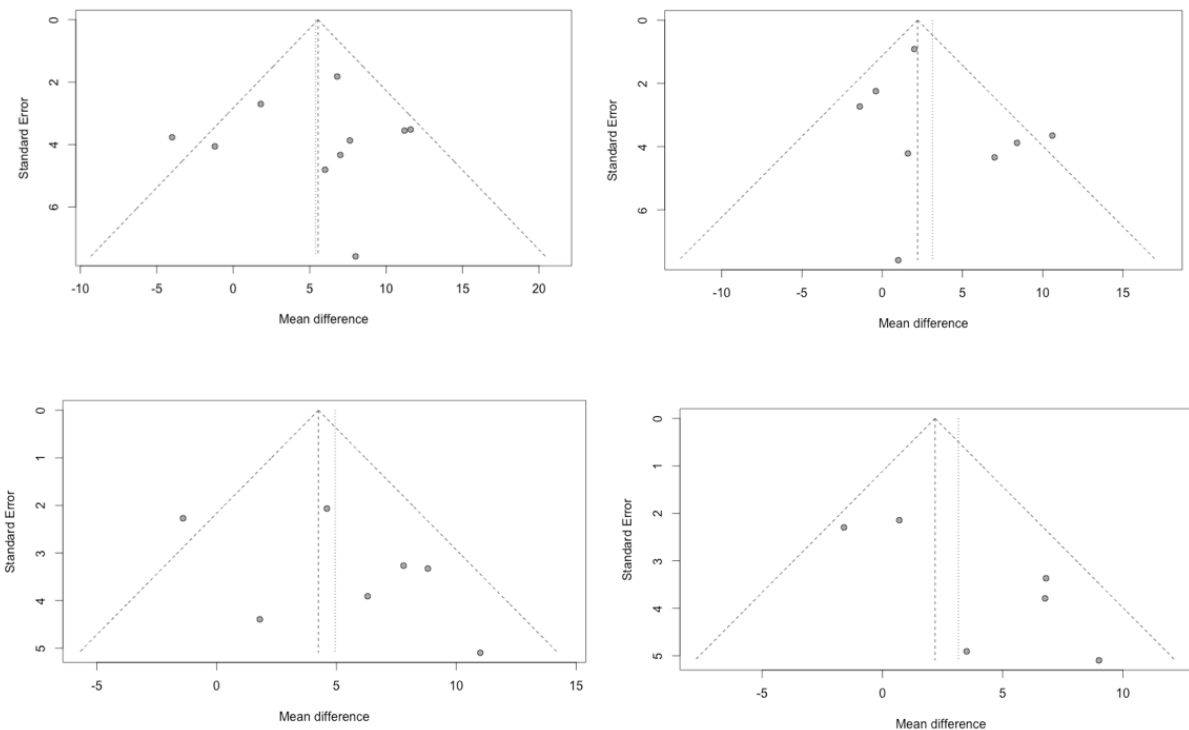

Top left: Short-term pain; Top right: Long-term pain; Bottom left: Short-term function; Bottom right: Long-term function

Appendix Figure 17: Meta-analysis of Mortality

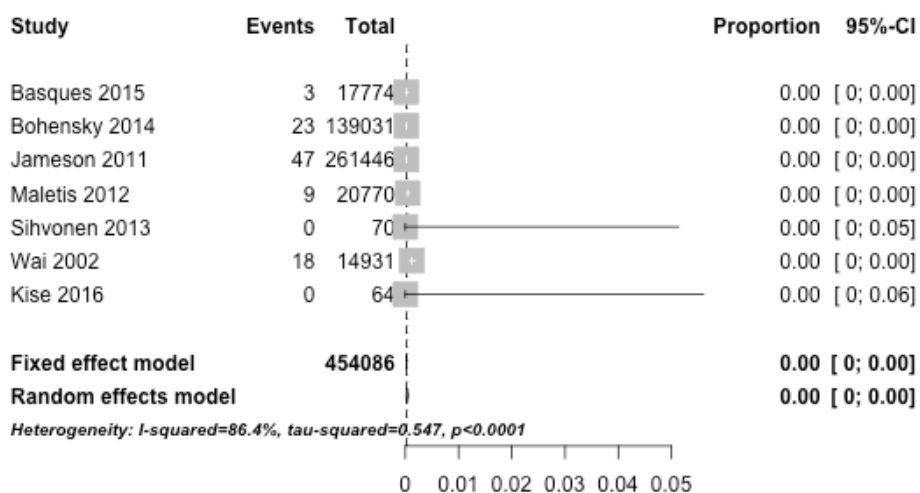



Appendix Figure 18: Meta-analysis of VTE

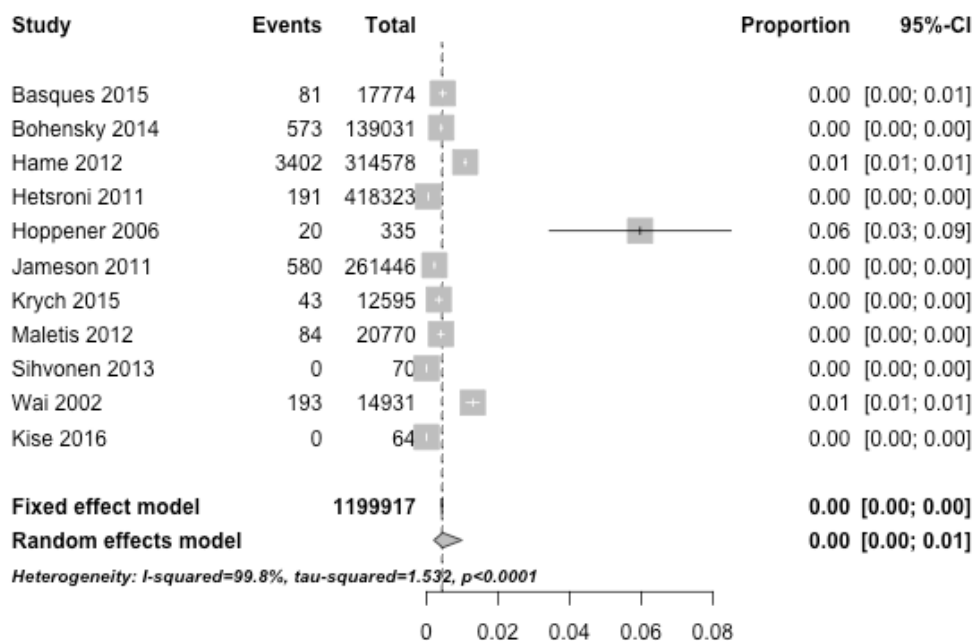

Appendix Figure 19: Meta-analysis of infection

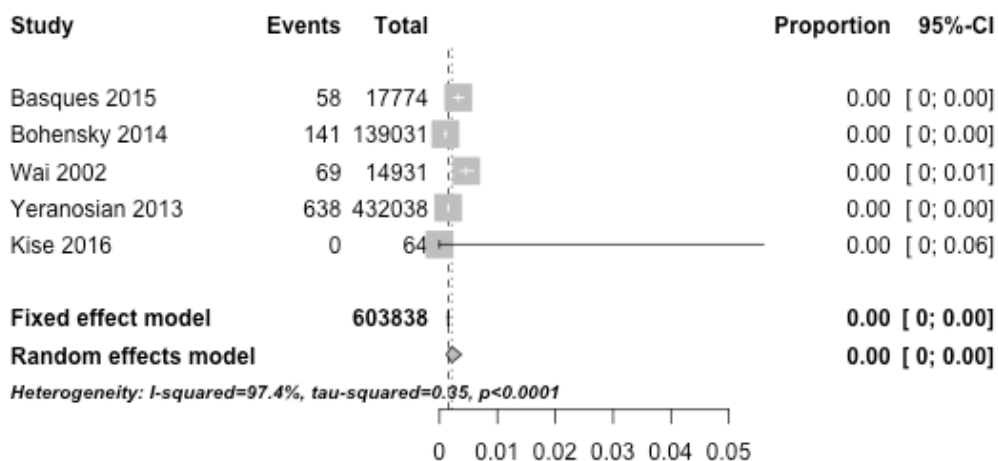

Appendix Figure 20: Risk of bias of the studies included in the systematic review of complications of knee arthroscopy

|                 | Inclusion of consecutive patients | Prospective collection of data | Unbiased assessment of outcomes | Appropriate length of follow-up | Incomplete outcome data (attrition bias) | Prospective calculation of sample size |
|-----------------|-----------------------------------|--------------------------------|---------------------------------|---------------------------------|------------------------------------------|----------------------------------------|
| Basques 2015    | +                                 | -                              | +                               | +                               | +                                        | +                                      |
| Bohensky 2014   | +                                 | -                              | +                               | +                               | +                                        | +                                      |
| Cancienne 2016  | +                                 | -                              | +                               | +                               | +                                        | +                                      |
| Hame 2012       | +                                 | -                              | +                               | +                               | +                                        | +                                      |
| Hetsroni 2011   | +                                 | -                              | +                               | +                               | +                                        | +                                      |
| Hoppener 2006   | +                                 | +                              | +                               | +                               | +                                        | -                                      |
| Jameson 2011    | +                                 | -                              | +                               | +                               | +                                        | +                                      |
| Katz 2013       | -                                 | -                              | +                               | +                               | +                                        | -                                      |
| Kise 2016       | -                                 | +                              | +                               | +                               | +                                        | -                                      |
| Krych 2015      | -                                 | -                              | +                               | +                               | -                                        | +                                      |
| Maletis 2012    | +                                 | -                              | +                               | +                               | +                                        | +                                      |
| Sihvonen 2013   | -                                 | +                              | +                               | +                               | +                                        | -                                      |
| Wai 2002        | +                                 | -                              | +                               | +                               | +                                        | +                                      |
| Yacub 2009      | +                                 | -                              | +                               | +                               | +                                        | +                                      |
| Yeranosian 2013 | -                                 | +                              | +                               | +                               | +                                        | -                                      |

Appendix Figure 21: Funnel plots for publication bias assessment of complications of knee arthroscopy

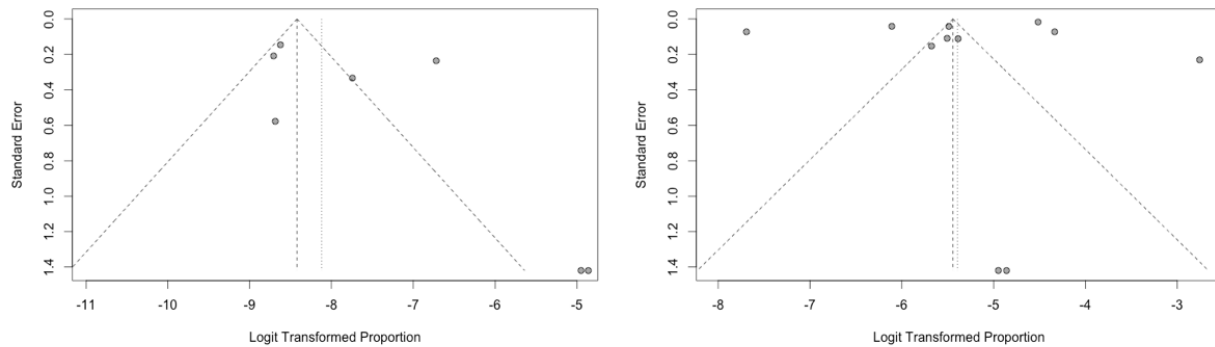

Left: Mortality; Right: VTE. Outliers represent the findings of two randomized clinical trials with small sample sizes and 0 events observed.

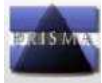

# PRISMA 2009 Checklist

1  
2  
3  
4  
5  
6  
7  
8  
9  
10  
11  
12  
13  
14  
15  
16  
17  
18  
19  
20  
21  
22  
23  
24  
25  
26  
27  
28  
29  
30  
31  
32  
33  
34  
35  
36  
37  
38  
39  
40  
41  
42  
43  
44  
45  
46  
47  
48  
49

| Section/topic                      | #  | Checklist item                                                                                                                                                                                                                                                                                              | Reported on page # |
|------------------------------------|----|-------------------------------------------------------------------------------------------------------------------------------------------------------------------------------------------------------------------------------------------------------------------------------------------------------------|--------------------|
| <b>TITLE</b>                       |    |                                                                                                                                                                                                                                                                                                             |                    |
| Title                              | 1  | Identify the report as a systematic review, meta-analysis, or both.                                                                                                                                                                                                                                         | 1                  |
| <b>ABSTRACT</b>                    |    |                                                                                                                                                                                                                                                                                                             |                    |
| Structured summary                 | 2  | Provide a structured summary including, as applicable: background; objectives; data sources; study eligibility criteria, participants, and interventions; study appraisal and synthesis methods; results; limitations; conclusions and implications of key findings; systematic review registration number. | 2                  |
| <b>INTRODUCTION</b>                |    |                                                                                                                                                                                                                                                                                                             |                    |
| Rationale                          | 3  | Describe the rationale for the review in the context of what is already known.                                                                                                                                                                                                                              | 4-5                |
| Objectives                         | 4  | Provide an explicit statement of questions being addressed with reference to participants, interventions, comparisons, outcomes, and study design (PICOS).                                                                                                                                                  | 5                  |
| <b>METHODS</b>                     |    |                                                                                                                                                                                                                                                                                                             |                    |
| Protocol and registration          | 5  | Indicate if a review protocol exists, if and where it can be accessed (e.g., Web address), and, if available, provide registration information including registration number.                                                                                                                               | 3,5                |
| Eligibility criteria               | 6  | Specify study characteristics (e.g., PICOS, length of follow-up) and report characteristics (e.g., years considered, language, publication status) used as criteria for eligibility, giving rationale.                                                                                                      | 5,6                |
| Information sources                | 7  | Describe all information sources (e.g., databases with dates of coverage, contact with study authors to identify additional studies) in the search and date last searched.                                                                                                                                  | 6                  |
| Search                             | 8  | Present full electronic search strategy for at least one database, including any limits used, such that it could be repeated.                                                                                                                                                                               | 26-28              |
| Study selection                    | 9  | State the process for selecting studies (i.e., screening, eligibility, included in systematic review, and, if applicable, included in the meta-analysis).                                                                                                                                                   | 6                  |
| Data collection process            | 10 | Describe method of data extraction from reports (e.g., piloted forms, independently, in duplicate) and any processes for obtaining and confirming data from investigators.                                                                                                                                  | 6-7                |
| Data items                         | 11 | List and define all variables for which data were sought (e.g., PICOS, funding sources) and any assumptions and simplifications made.                                                                                                                                                                       | 6-7                |
| Risk of bias in individual studies | 12 | Describe methods used for assessing risk of bias of individual studies (including specification of whether this was done at the study or outcome level), and how this information is to be used in any data synthesis.                                                                                      | 8                  |
| Summary measures                   | 13 | State the principal summary measures (e.g., risk ratio, difference in means).                                                                                                                                                                                                                               | 7                  |
| Synthesis of results               | 14 | Describe the methods of handling data and combining results of studies, if done, including measures of consistency (e.g., $I^2$ for each meta-analysis).                                                                                                                                                    | 7-8                |



# PRISMA 2009 Checklist

Page 1 of 2

| Section/topic                                                                                                                              | #  | Checklist item                                                                                                                                                                                           | Reported on page #                |
|--------------------------------------------------------------------------------------------------------------------------------------------|----|----------------------------------------------------------------------------------------------------------------------------------------------------------------------------------------------------------|-----------------------------------|
| Risk of bias across studies                                                                                                                | 15 | Specify any assessment of risk of bias that may affect the cumulative evidence (e.g., publication bias, selective reporting within studies).                                                             | 8                                 |
| Additional analyses                                                                                                                        | 16 | Describe methods of additional analyses (e.g., sensitivity or subgroup analyses, meta-regression), if done, indicating which were pre-specified.                                                         | 8                                 |
| <b>RESULTS</b>                                                                                                                             |    |                                                                                                                                                                                                          |                                   |
| Study selection                                                                                                                            | 17 | Give numbers of studies screened, assessed for eligibility, and included in the review, with reasons for exclusions at each stage, ideally with a flow diagram.                                          | 9,25                              |
| Study characteristics                                                                                                                      | 18 | For each study, present characteristics for which data were extracted (e.g., study size, PICOS, follow-up period) and provide the citations.                                                             | 9-10, 15-16                       |
| Risk of bias within studies                                                                                                                | 19 | Present data on risk of bias of each study and, if available, any outcome level assessment (see item 12).                                                                                                | 15, 17, 41, 44                    |
| Results of individual studies                                                                                                              | 20 | For all outcomes considered (benefits or harms), present, for each study: (a) simple summary data for each intervention group (b) effect estimates and confidence intervals, ideally with a forest plot. | 30-31, 39-40, 42-43               |
| Synthesis of results                                                                                                                       | 21 | Present results of each meta-analysis done, including confidence intervals and measures of consistency.                                                                                                  | 11-13, 16-17, 30-31, 39-40, 44-43 |
| Risk of bias across studies                                                                                                                | 22 | Present results of any assessment of risk of bias across studies (see Item 15).                                                                                                                          | 15, 17                            |
| Additional analysis                                                                                                                        | 23 | Give results of additional analyses, if done (e.g., sensitivity or subgroup analyses, meta-regression [see Item 16]).                                                                                    | 11-12, 29, 32-39                  |
| <b>DISCUSSION</b>                                                                                                                          |    |                                                                                                                                                                                                          |                                   |
| Summary of evidence                                                                                                                        | 24 | Summarize the main findings including the strength of evidence for each main outcome; consider their relevance to key groups (e.g., healthcare providers, users, and policy makers).                     | 17, 18                            |
| Limitations                                                                                                                                | 25 | Discuss limitations at study and outcome level (e.g., risk of bias), and at review-level (e.g., incomplete retrieval of identified research, reporting bias).                                            | 19                                |
| Conclusions                                                                                                                                | 26 | Provide a general interpretation of the results in the context of other evidence, and implications for future research.                                                                                  | 19                                |
| <b>FUNDING</b>                                                                                                                             |    |                                                                                                                                                                                                          |                                   |
| For peer review only - <a href="http://bmjopen.bmj.com/site/about/guidelines.xhtml">http://bmjopen.bmj.com/site/about/guidelines.xhtml</a> |    |                                                                                                                                                                                                          |                                   |

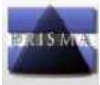

# PRISMA 2009 Checklist

1  
2  
3  
4  
5  
6  
7  
8  
9  
10  
11  
12  
13  
14  
15  
16  
17  
18  
19  
20  
21  
22  
23  
24  
25  
26  
27  
28  
29  
30  
31  
32  
33  
34  
35  
36  
37  
38  
39  
40  
41  
42  
43  
44  
45  
46  
47  
48  
49

|         |    |                                                                                                                                            |    |
|---------|----|--------------------------------------------------------------------------------------------------------------------------------------------|----|
| Funding | 27 | Describe sources of funding for the systematic review and other support (e.g., supply of data); role of funders for the systematic review. | 19 |
|---------|----|--------------------------------------------------------------------------------------------------------------------------------------------|----|

From: Moher D, Liberati A, Tetzlaff J, Altman DG, The PRISMA Group (2009). Preferred Reporting Items for Systematic Reviews and Meta-Analyses: The PRISMA Statement. PLoS Med 6(7): e1000097. doi:10.1371/journal.pmed1000097

For more information, visit: [www.prisma-statement.org](http://www.prisma-statement.org).

Page 2 of 2

For peer review only
