# Supplementary material for: Knee arthroscopy versus conservative management in patients with degenerative knee disease: a systematic review
Source: PubMed Central journal article supplement — BMJ Open. 2017 May 11;7(5):e016114. doi: 10.1136/bmjopen-2017-016114 (PMC5541494; doi:10.1136/bmjopen-2017-016114), 2017-05-11
Supplement: bmjopen-2017-016114supp001.pdf [file bmjopen-2017-016114supp001.pdf]

## Appendix 1: Search strategies

### **Update of effects and complications of knee arthroscopy**

#### **MEDLINE (Pubmed)**

1. (((("Menisci, Tibial/surgery"[MeSH Major Topic]) OR ("Menisci, Tibial/injuries"[MeSH Major Topic]) OR ("Degenerative meniscal tear"[Title/Abstract]) OR ("Arthroscopic lavage"[Title/Abstract]) OR ("Arthroscopic debridement"[Title/Abstract]) OR ("arthroscopic meniscectomy"[Title/Abstract]) OR ((arthroscopy[Title/Abstract]) AND knee[Title/Abstract]))
2. (("Randomized"[Title/Abstract]) OR ("Randomized controlled trial"[Publication Type]) OR ("randomized controlled trials as topic"[MeSH Major Topic]) OR ("Random allocation"[MeSH Major Topic]) OR ("Control group"[Title/Abstract]) OR ("Control groups"[MeSH Terms]) OR ("Cross-over studies"[Title/Abstract]) OR ("Cross-over study"[Title/Abstract]))
3. (((("Menisci, Tibial/surgery"[MeSH Major Topic]) OR ("Menisci, Tibial/injuries"[MeSH Major Topic]) OR ("Degenerative meniscal tear"[Title/Abstract]) OR ("Arthroscopic lavage"[Title/Abstract]) OR ("Arthroscopic debridement"[Title/Abstract]) OR ("arthroscopic meniscectomy"[Title/Abstract]) OR ((arthroscopy[Title/Abstract]) AND knee[Title/Abstract]))
4. (("adverse events"[Title/Abstract]) OR ("side effects"[Title/Abstract]) OR ("adverse effects"[Title/Abstract]) OR (complication\*[Title/Abstract]) OR ("adverse effects"[MeSH Subheading])))
5. 1 AND 2
6. 3 AND 4
7. 5 OR 6

#### **EMBASE (Ovid)**

1. Arthroscopic meniscectomy.ti,ab,kw.
2. Arthroscopic debridement.ti,ab,kw.
3. Arthroscopic lavage.ti,ab,kw.
4. Degenerative meniscal tear.ti,ab,kw.
5. knee meniscus/ or meniscus tibial.mp.
6. exp knee arthroscopy/
7. 1 or 2 or 3 or 4 or 5 or 6
8. randomized controlled trial/
9. randomized.ti,ab,kw.
10. randomised.ti,ab,kw.
11. Random allocation.mp.

12. randomised.mp.
13. "randomized controlled trial (topic)"/
14. Control group.mp.
15. control group/
16. crossover procedure/
17. 8 or 9 or 10 or 11 or 12 or 13 or 14 or 15 or 16
18. adverse events.mp.
19. side effects.mp.
20. adverse effects.mp.
21. complications.mp.
22. 18 or 19 or 20 or 21
23. 7 and 17
24. 7 and 22
25. 23 or 24
26. limit 25 to yr="2014-2016"

### **Cochrane Central Register of Controlled Trials**

- #1 MeSH descriptor: [Menisci, Tibial] explode all trees and with qualifier(s): [Injuries - IN, Surgery - SU]
- #2 MeSH descriptor: [Arthroscopy] explode all trees
- #3 MeSH descriptor: [Knee] explode all trees
- #4 #2 and #3
- #5 Degenerative meniscal tear:ti,ab,kw (Word variations have been searched)
- #6 Arthroscopic lavage:ti,ab,kw (Word variations have been searched)
- #7 Arthroscopic debridement:ti,ab,kw (Word variations have been searched)
- #8 arthroscopic meniscectomy:ti,ab,kw (Word variations have been searched)
- #9 #1 or #4 or #5 or #6 or #7 or #8 Publication Year from 2014 to 2016, in Trials

### **New search of outcome nerve damage**

### **Medline Pubmed**

("Peripheral Nerve Injuries"[Mesh]) AND ("Arthroplasty, Replacement, Knee/adverse effects"[Mesh] OR "knee arthroscopy" OR ("arthroscop\*" AND "knee"))

**Embase (Ovid)**

1. exp nerve injury/
2. exp knee arthroscopy/
3. 1 AND 2

Appendix 2: Results of sensitivity analyses to assess the robustness of the difference in the proportion of patients who reach a change higher than the MID

| <b>Outcome</b>             | <b>MID (range)</b>                            | <b>Risk difference (95% CI)</b> | <b>Risk difference when using lowest value of the range (95% CI)</b> | <b>Risk difference when using highest value of the range (95% CI)</b> | <b>Risk difference based on the standardized mean difference* (95% CI)</b> |
|----------------------------|-----------------------------------------------|---------------------------------|----------------------------------------------------------------------|-----------------------------------------------------------------------|----------------------------------------------------------------------------|
| Pain in the short term     | KOOS pain <sup>58</sup><br>12 (4; 20)         | 12.4%<br>(4.4; 20.4)            | 10.5%<br>(4.3; 16.7))                                                | 11.3%<br>(2.9; 19.7)                                                  | 9%<br>(1.7; 15.7)                                                          |
|                            | WOMAC pain <sup>61</sup><br>12 (2; 30)        |                                 |                                                                      |                                                                       |                                                                            |
| Function in the short term | KOOS ADL <sup>58</sup><br>8 (3; 9)            | 13.4%<br>(4.4; 22.3)            | 11.3%<br>(3; 19.5)                                                   | 11%<br>(2; 19.9)                                                      | 7.3%<br>(-0.06; 15.1)                                                      |
|                            | WOMAC function <sup>61 62</sup><br>13 (3; 34) |                                 |                                                                      |                                                                       |                                                                            |

\*This method relies on the standardized mean difference. It does not use any specific threshold to calculate the risk difference.

Appendix Figure 1: Meta-analysis of pain in the short-term (difference in change from baseline)

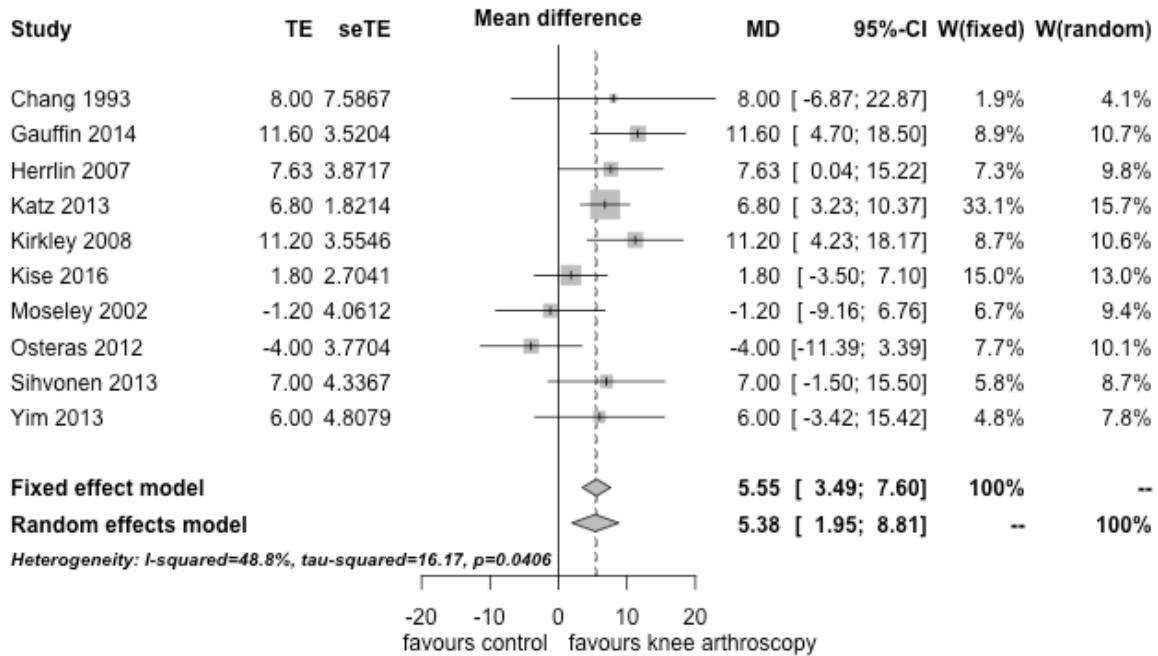

Appendix Figure 2: Meta-analysis of pain in the long-term (difference in change from baseline)

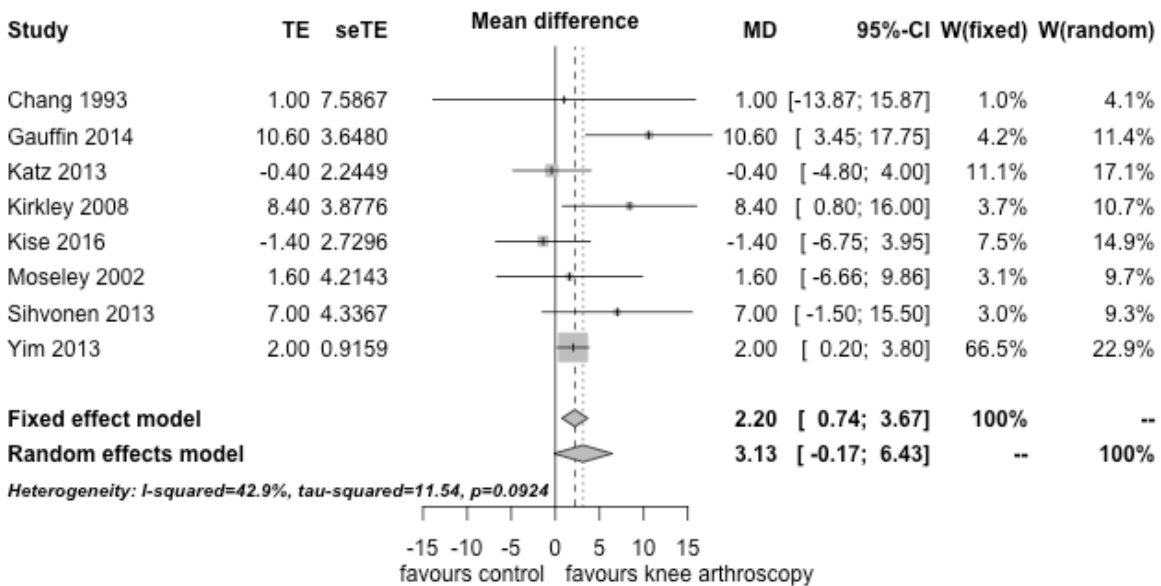

Appendix Figure 3: Meta-analysis of function in the short-term (difference in change from baseline)

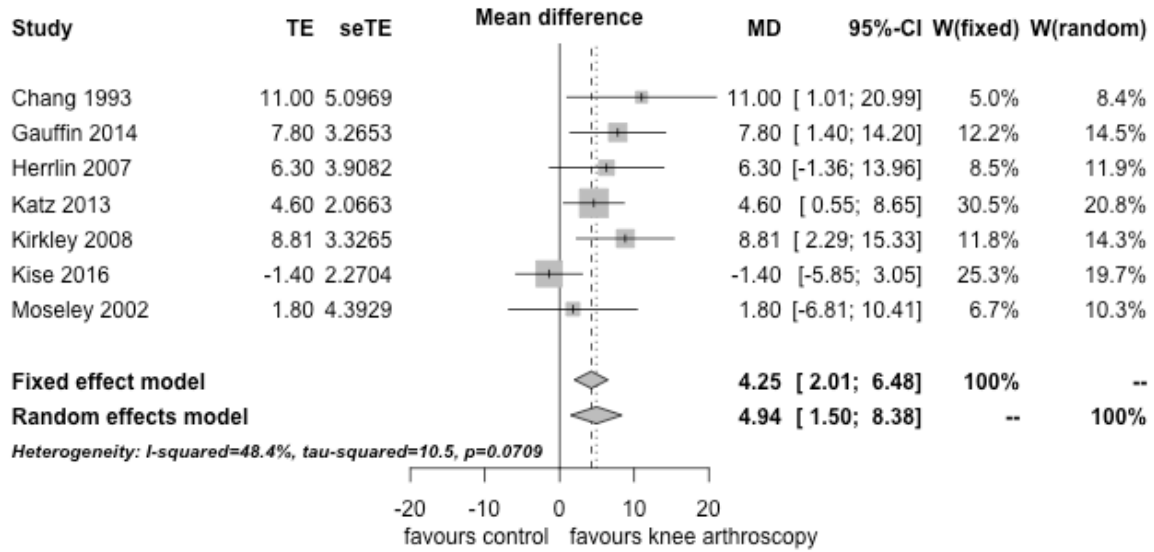

Appendix Figure 4: Meta-analysis of function in the long-term (difference in change from baseline)

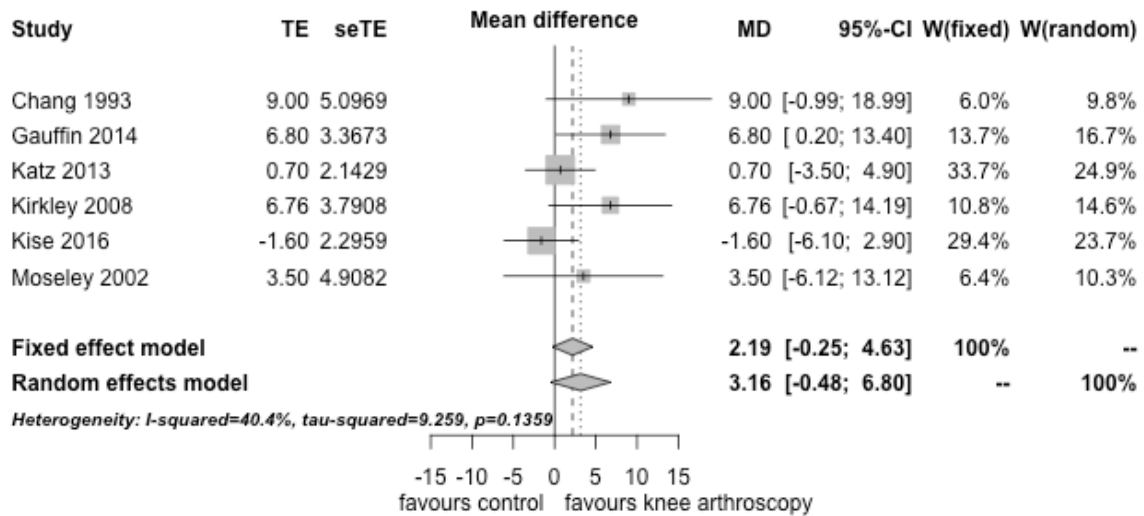

Appendix Figure 5: Subgroup analysis of pain in the short term (difference on change from baseline) according to blinding of the studies. P value of test for subgroup effect= 0.48

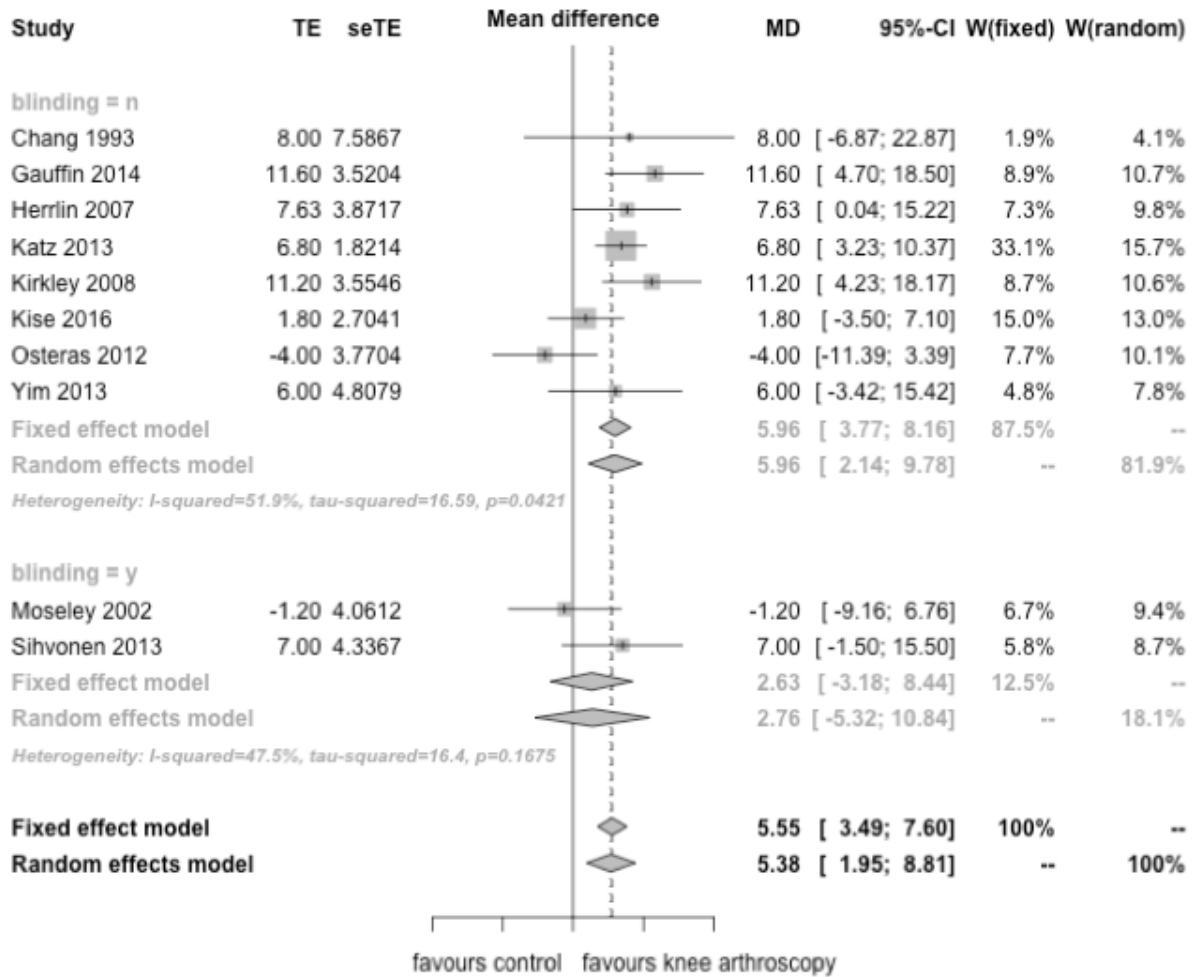

Appendix Figure 6: Subgroup analysis of pain in the short term (difference on change from baseline) according to percentage of patients with radiographic knee osteoarthritis (>50% patients). P value of test for subgroup effect= 0.88

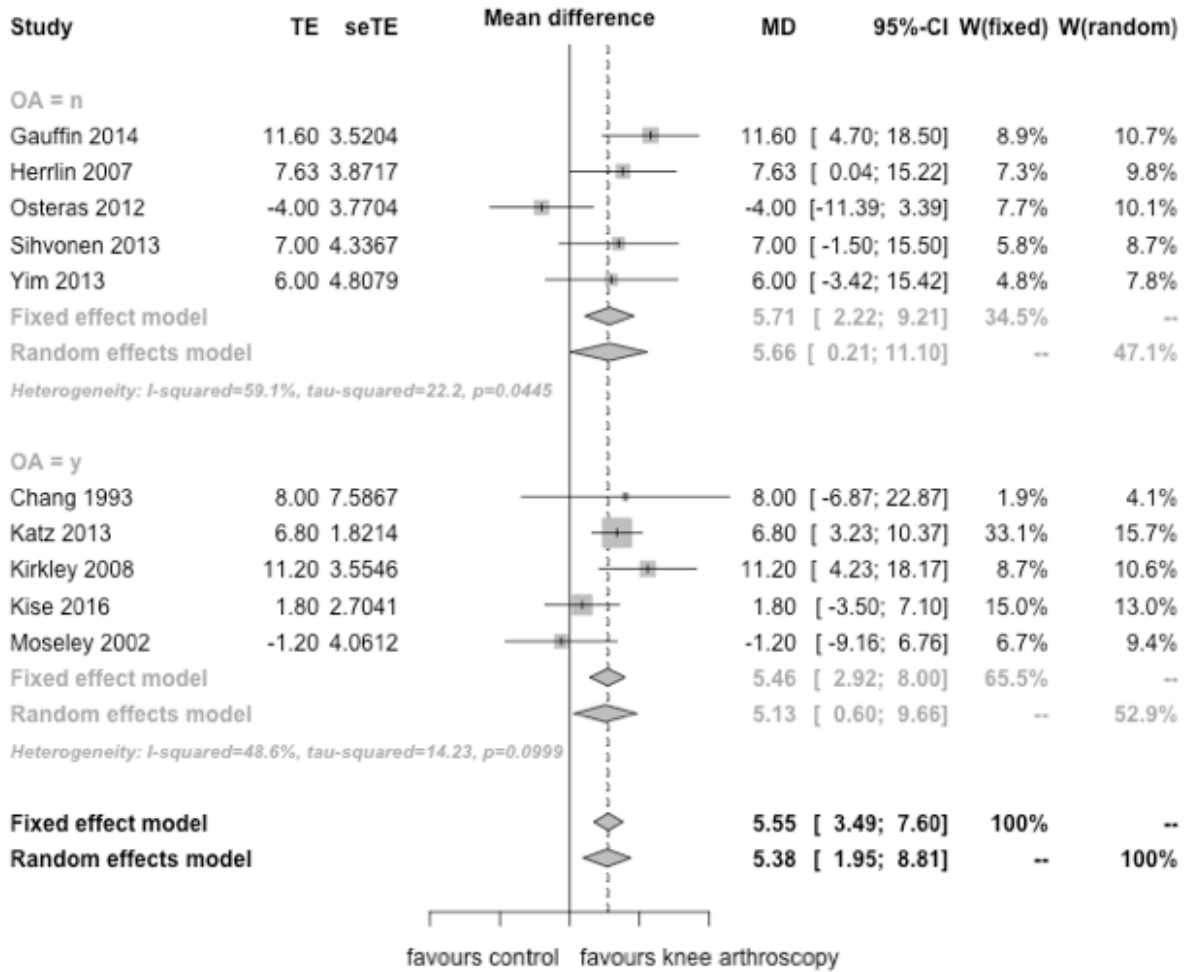



Appendix Figure 7: Subgroup analysis of pain in the long term (difference on change from baseline) according to blinding of the studies. P value of test for subgroup effect= 0.75

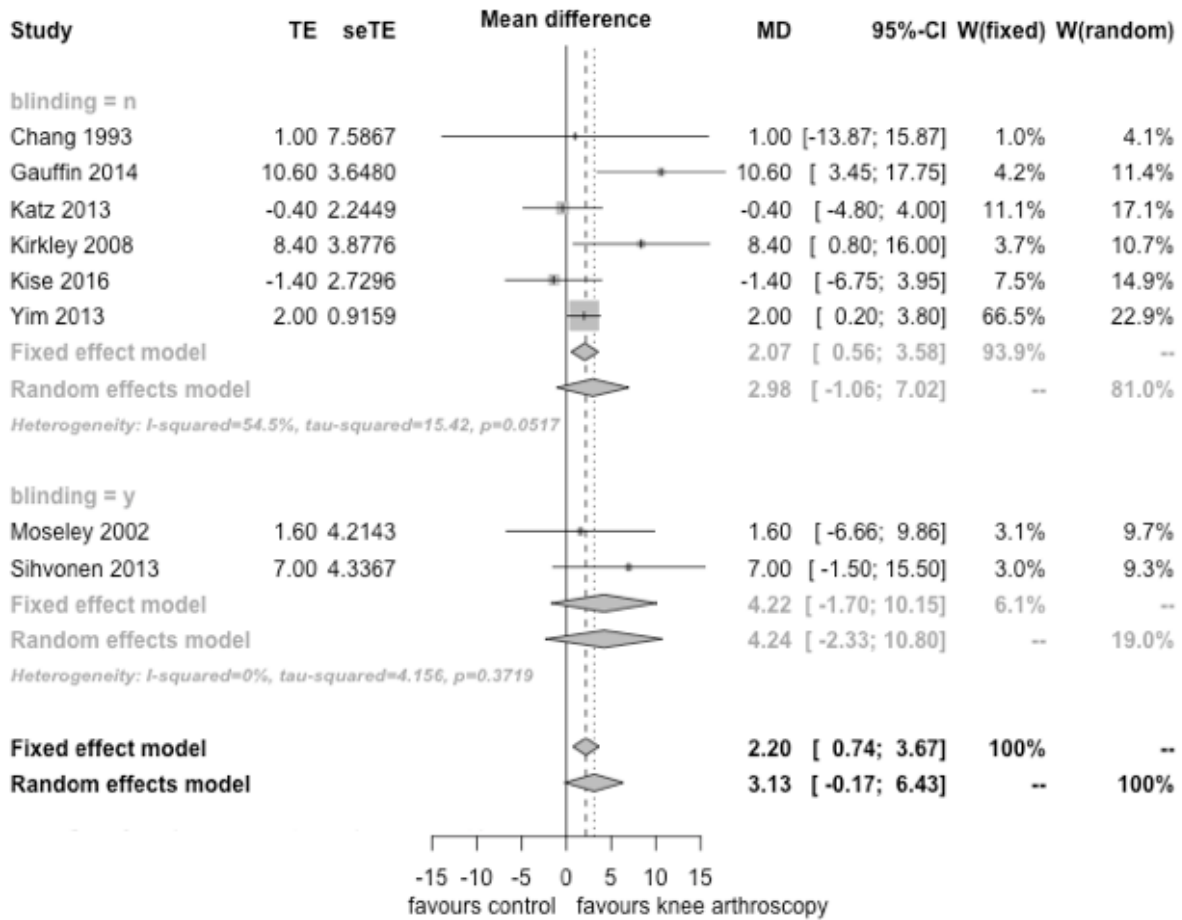

Appendix Figure 8: Subgroup analysis of pain in the long term (difference on change from baseline) according to percentage of patients with radiographic knee osteoarthritis (>50% patients). P value of test for subgroup effect= 0.22

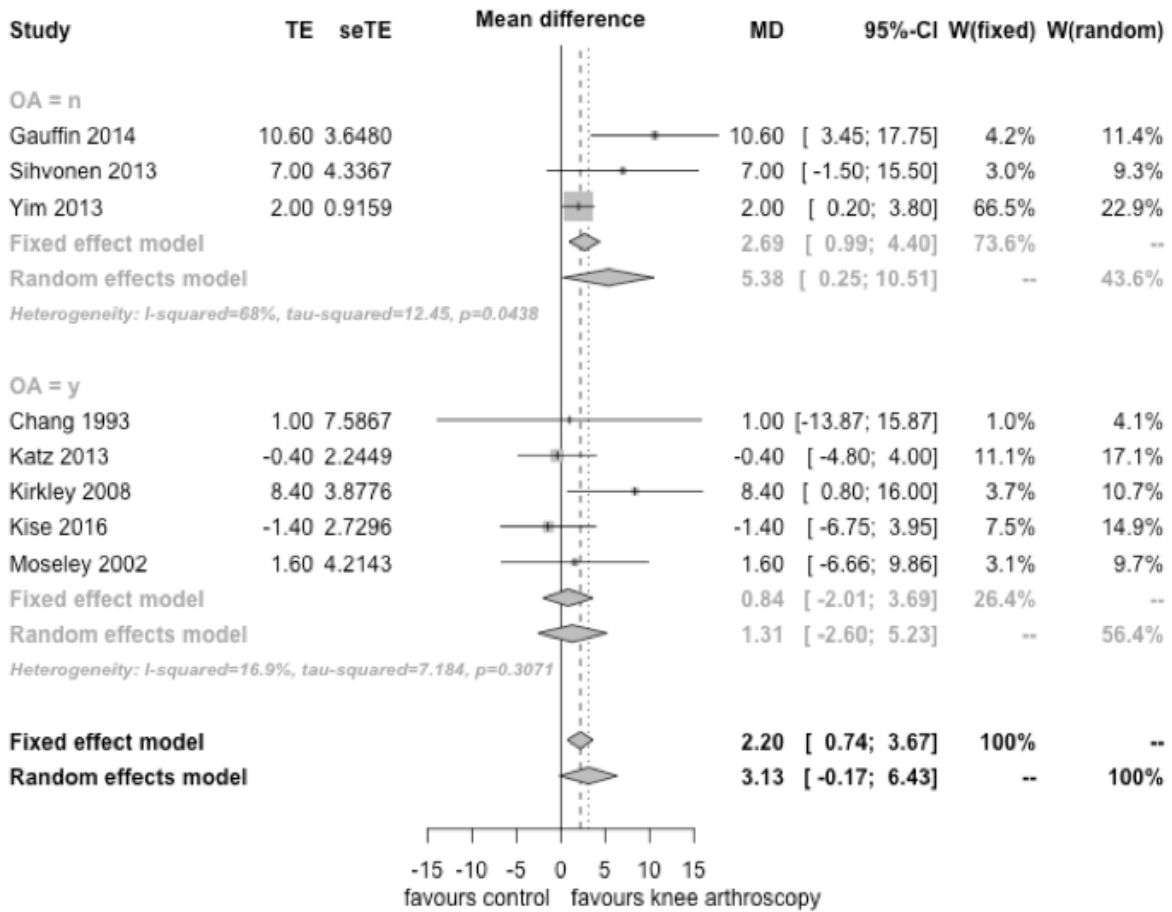

Appendix Figure 9: Subgroup analysis of function in the short term (difference on change from baseline) according to blinding of the studies. P value of test for subgroup effect= 0.46

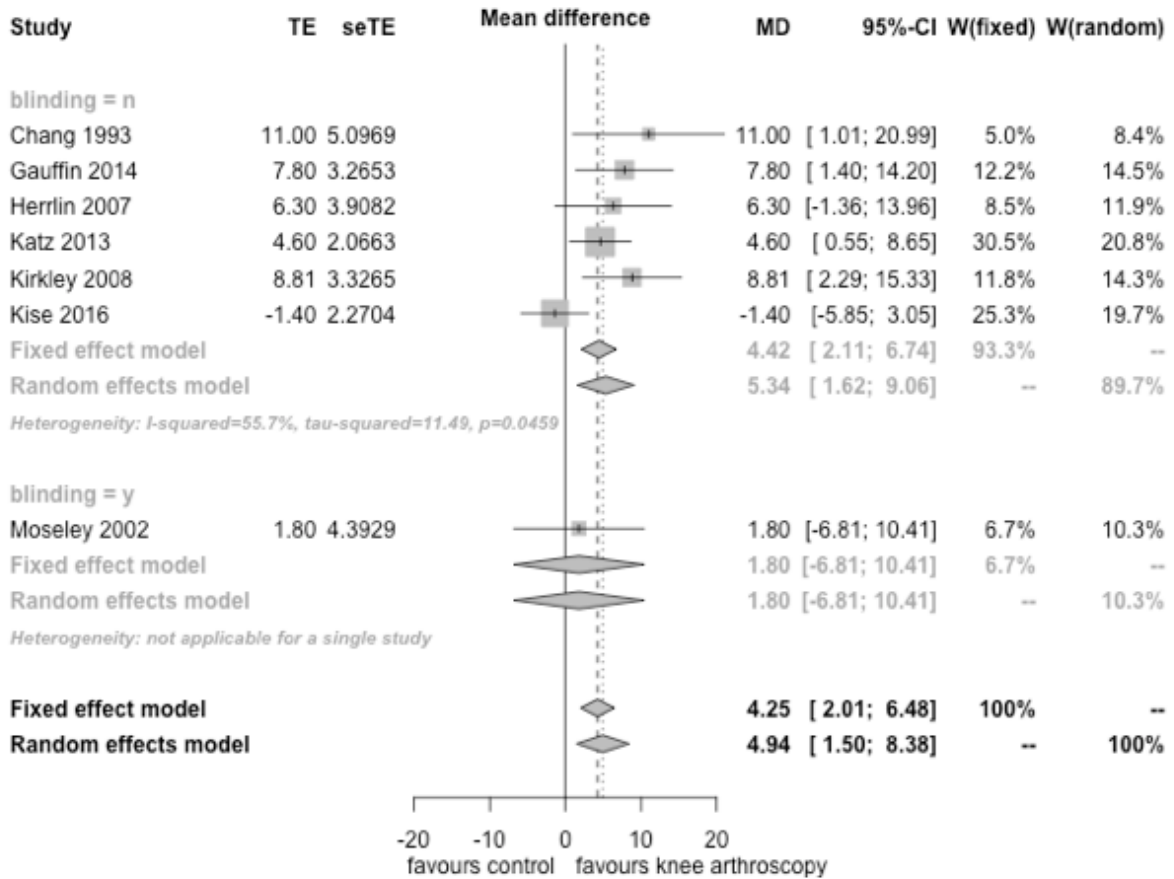

Appendix Figure 10: Subgroup analysis of function in the short term (difference on change from baseline) according to percentage of patients with radiographic knee osteoarthritis (>50% patients). P value of test for subgroup effect= 0.40

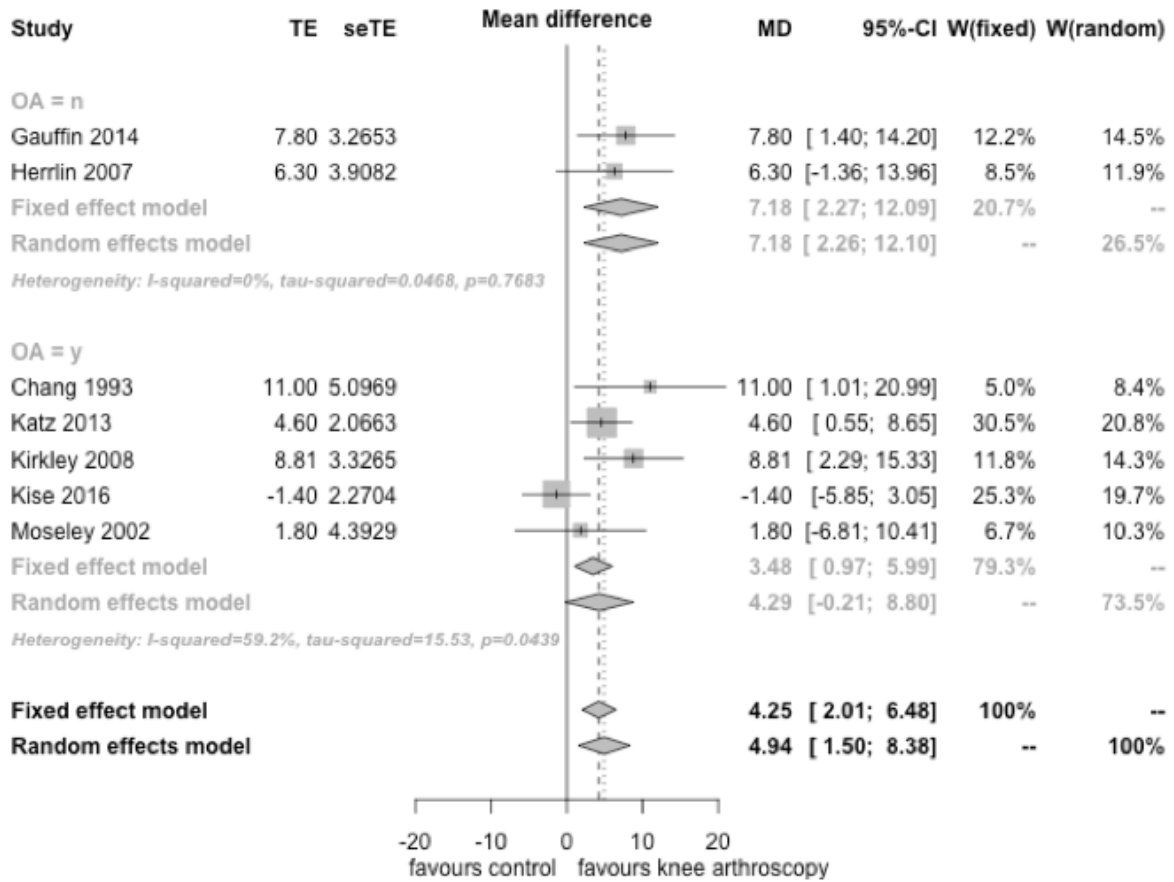

Appendix Figure 11: Subgroup analysis of function in the long term (difference on change from baseline) according to blinding of the studies. P value of test for subgroup effect= 0.97

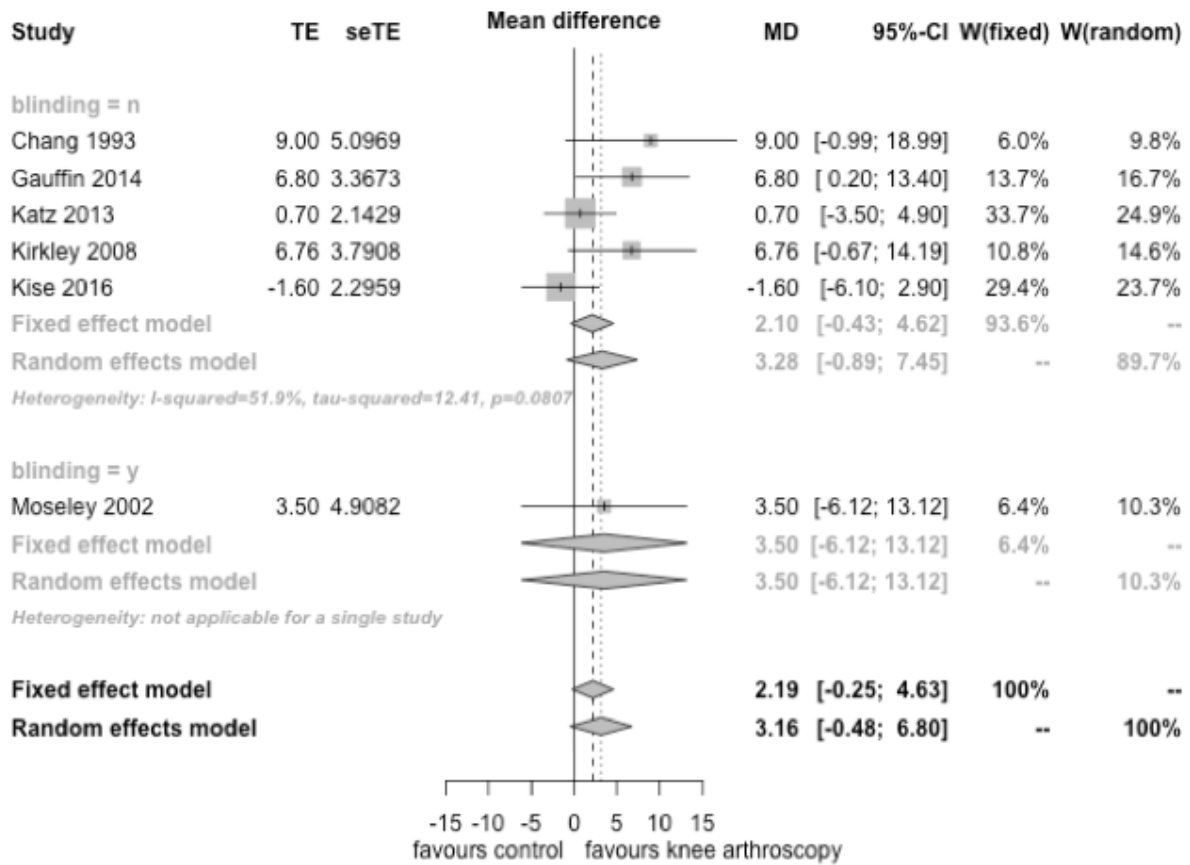

Appendix Figure 12: Subgroup analysis of function in the long term (difference on change from baseline) according to percentage of patients with radiographic knee osteoarthritis (>50% patients). P value of test for subgroup effect= 0.27

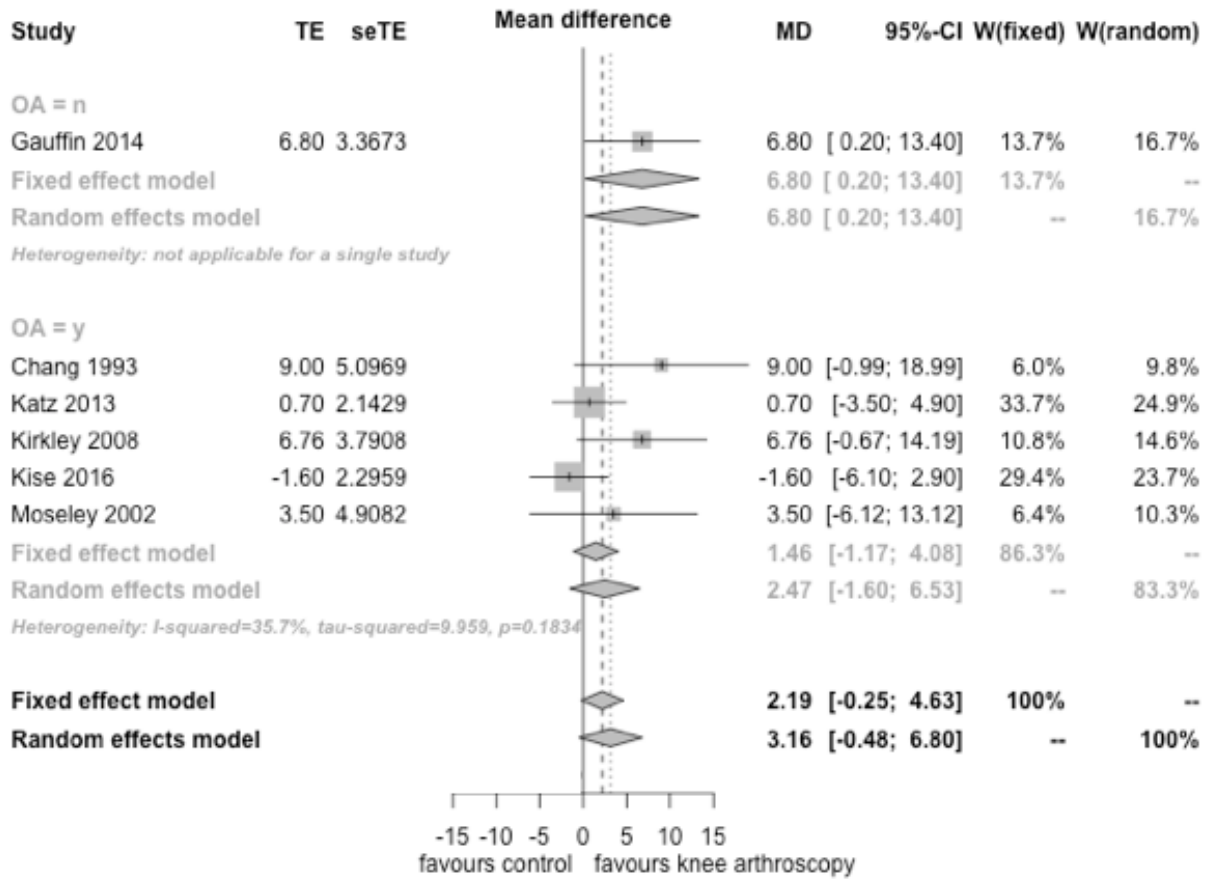

Appendix Figure 13: Meta-analysis of Quality of life in the long-term (difference in change from baseline)

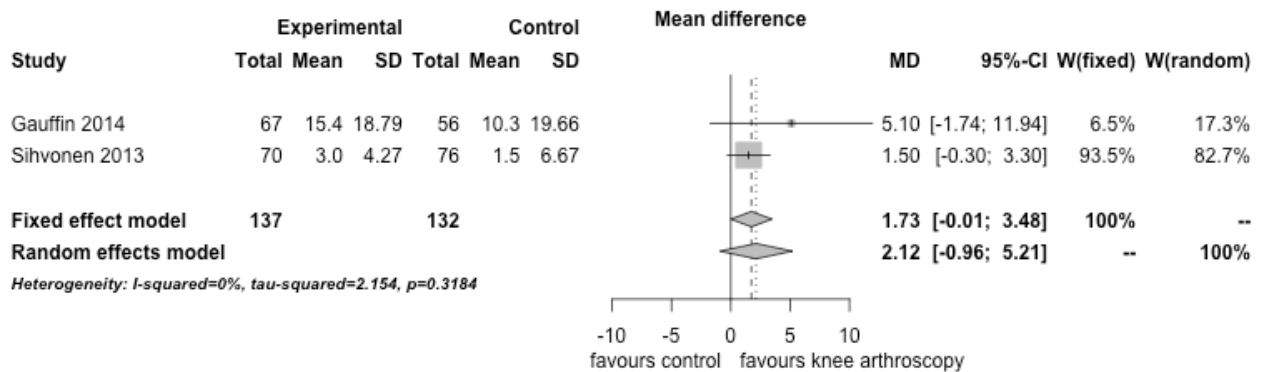

Appendix Figure 14: Meta-analysis of Knee Replacement

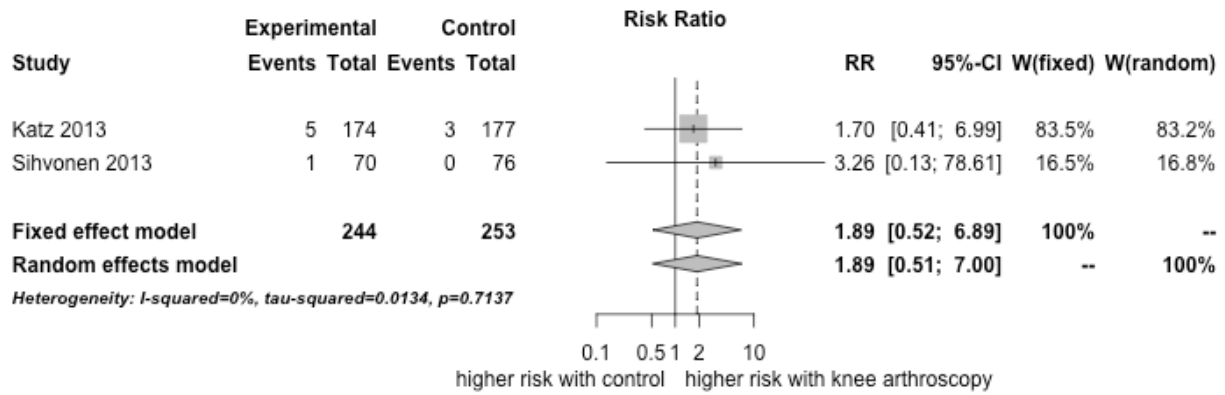

Appendix Figure 15: Risk of bias of studies included in the systematic review of effects of knee arthroscopy

|                    | Random sequence generation (selection bias) | Allocation concealment (selection bias) | Blinding of participants (performance and detection bias) | Incomplete outcome data (attrition bias) | Selective reporting (reporting bias) | Other bias |
|--------------------|---------------------------------------------|-----------------------------------------|-----------------------------------------------------------|------------------------------------------|--------------------------------------|------------|
| Chang 1993         | +                                           | -                                       | -                                                         | +                                        | +                                    | +          |
| Gauffin 2014       | +                                           | +                                       | -                                                         | -                                        | +                                    | +          |
| Herrlin 2007, 2013 | +                                           | -                                       | -                                                         | -                                        | +                                    | -          |
| Katz 2013          | +                                           | +                                       | -                                                         | +                                        | +                                    | +          |
| Kirkley 2008       | +                                           | +                                       | -                                                         | -                                        | +                                    | +          |
| Kise 2016          | +                                           | +                                       | -                                                         | +                                        | +                                    | +          |
| Moseley 2002       | +                                           | +                                       | +                                                         | +                                        | +                                    | +          |
| Osteras 2012       | +                                           | +                                       | -                                                         | +                                        | +                                    | +          |
| Saeed 2015         | +                                           | -                                       | -                                                         | +                                        | -                                    | +          |
| Sihvonen 2013      | +                                           | +                                       | +                                                         | +                                        | +                                    | +          |
| Stensrud 2015      | +                                           | +                                       | -                                                         | -                                        | -                                    | +          |
| Vermesan 2013      | +                                           | -                                       | -                                                         | +                                        | -                                    | +          |
| Yim 2013           | +                                           | +                                       | -                                                         | +                                        | +                                    | +          |



Appendix Figure 16: Funnel plots for publication bias assessments of effects of knee arthroscopy

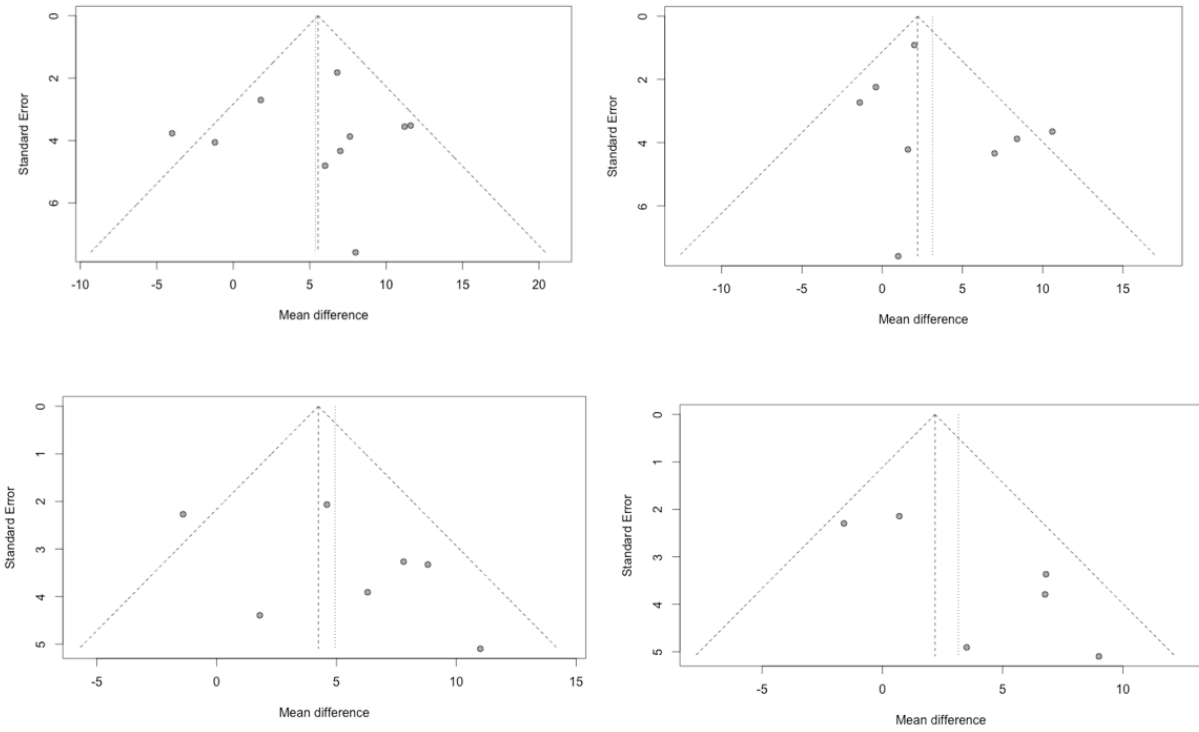

Top left: Short-term pain; Top right: Long-term pain; Bottom left: Short-term function; Bottom right: Long-term function

Appendix Figure 17: Meta-analysis of Mortality

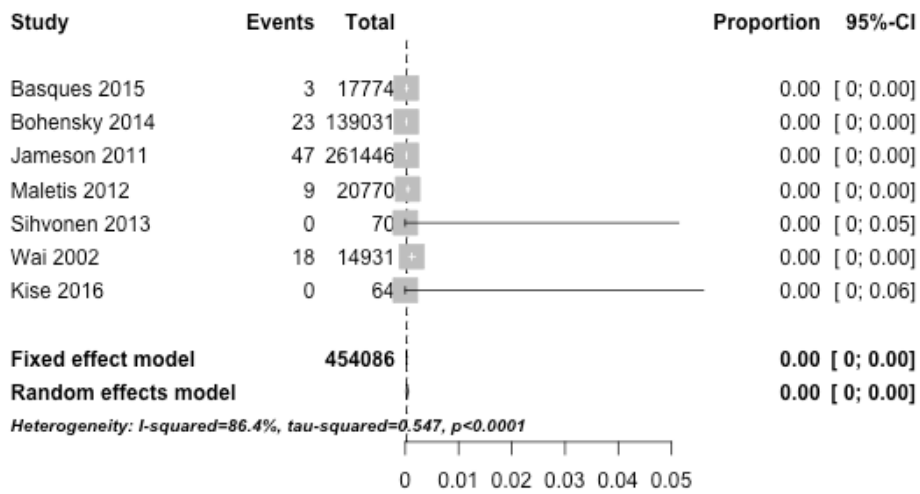

Appendix Figure 18: Meta-analysis of VTE

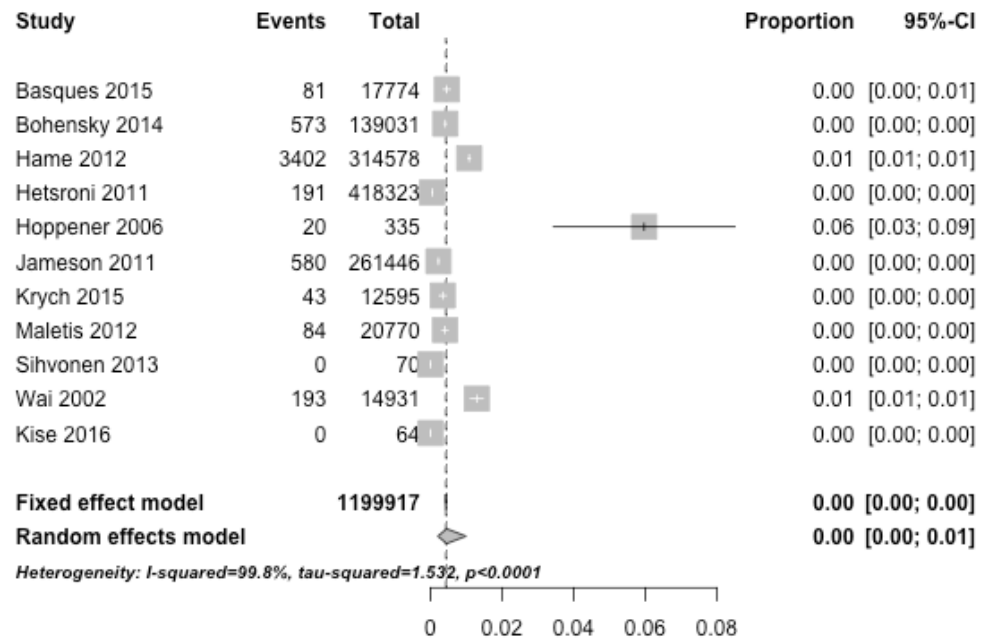

Appendix Figure 19: Meta-analysis of infection

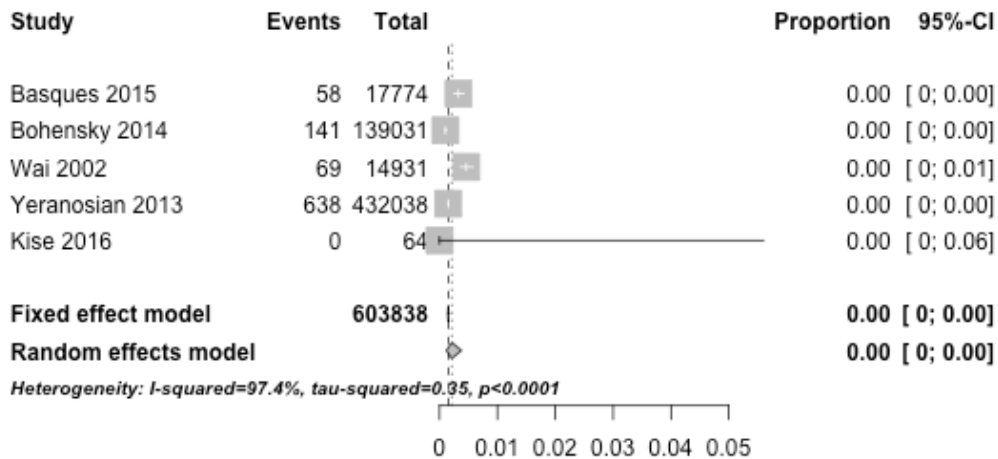

Appendix Figure 20: Risk of bias of the studies included in the systematic review of complications of knee arthroscopy

|                 | Inclusion of consecutive patients | Prospective collection of data | Unbiased assessment of outcomes | Appropriate length of follow-up | Incomplete outcome data (attrition bias) | Prospective calculation of sample size |
|-----------------|-----------------------------------|--------------------------------|---------------------------------|---------------------------------|------------------------------------------|----------------------------------------|
| Basques 2015    | +                                 | -                              | +                               | +                               | +                                        | +                                      |
| Bohensky 2014   | +                                 | -                              | +                               | +                               | +                                        | +                                      |
| Cancienne 2016  | +                                 | -                              | +                               | +                               | +                                        | +                                      |
| Hame 2012       | +                                 | -                              | +                               | +                               | +                                        | +                                      |
| Hetsroni 2011   | +                                 | -                              | +                               | +                               | +                                        | +                                      |
| Hoppener 2006   | +                                 | +                              | +                               | +                               | +                                        | -                                      |
| Jameson 2011    | +                                 | -                              | +                               | +                               | +                                        | +                                      |
| Katz 2013       | -                                 | -                              | +                               | +                               | +                                        | -                                      |
| Kise 2016       | -                                 | +                              | +                               | +                               | +                                        | -                                      |
| Krych 2015      | -                                 | -                              | +                               | +                               | -                                        | +                                      |
| Maletis 2012    | +                                 | -                              | +                               | +                               | +                                        | +                                      |
| Sihvonen 2013   | -                                 | +                              | +                               | +                               | +                                        | -                                      |
| Wai 2002        | +                                 | -                              | +                               | +                               | +                                        | +                                      |
| Yacub 2009      | +                                 | -                              | +                               | +                               | +                                        | +                                      |
| Yeranosian 2013 | -                                 | +                              | +                               | +                               | +                                        | -                                      |

Appendix Figure 21: Funnel plots for publication bias assessment of complications of knee arthroscopy

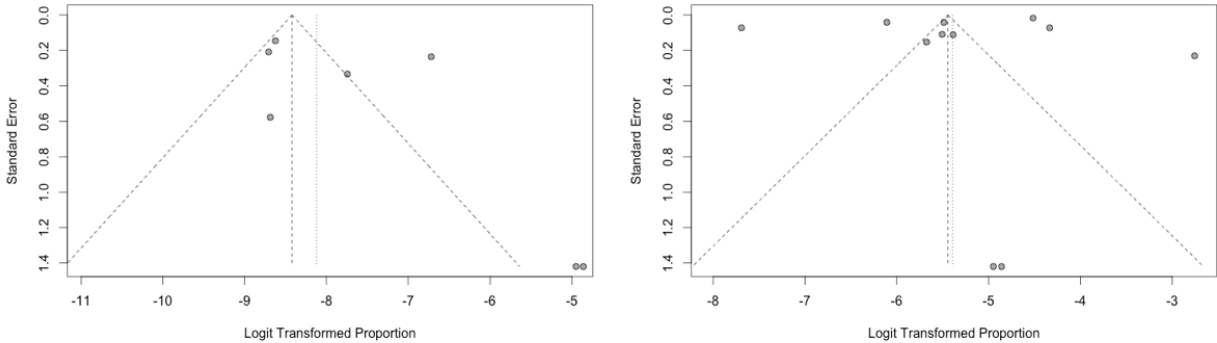

Left: Mortality; Right: VTE. Outliers represent the findings of two randomized clinical trials with small sample sizes and 0 events observed.
